# Supplementary material for: Selective Synthesis of Benzimidazoles from o-Phenylenediamine and Aldehydes Promoted by Supported Gold Nanoparticles
Source: PubMed Central journal article supplement (PMC7760220; doi:10.3390/nano10122405), 2020-12-01

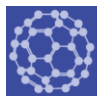

# Selective Synthesis of Benzimidazoles from *o*-Phenylenediamine and Aldehydes Promoted by Supported Gold Nanoparticles

Marina A. Tzani <sup>1</sup>, Catherine Gabriel <sup>2</sup> and Ioannis N. Lykakis <sup>1,\*</sup>

<sup>1</sup> Department of Chemistry, Aristotle University of Thessaloniki, University Campus, 54124 Thessaloniki, Greece; marina\_tzani@hotmail.com

<sup>2</sup> HERACLES Research Center, KEDEK, Laboratory of Environmental Engineering (EnvE-Lab), Department of Chemical Engineering, AUTH, 54124 Thessaloniki, Greece; katerinagabriel79@gmail.com

\* Correspondence: lykakis@chem.auth.gr; Tel./Fax: +30-2310-997871

## Table of Contents.

| Pages   | Supplementary Materials                                                                                                   |
|---------|---------------------------------------------------------------------------------------------------------------------------|
| S1      | Table of Contents                                                                                                         |
| S2      | Scheme S1. Synthesis of benzimidazoles using metal oxides as heterogeneous catalysts                                      |
| S3      | Scheme S2. Synthesis of benzimidazoles under photocatalytic reactions.                                                    |
| S4      | Table S1. Homogeneous catalyst screening for the reaction between <b>1</b> and <b>2</b> .                                 |
| S5      | Table S2. Heterogeneous surfaces screening for the reaction between <b>1</b> and <b>2</b> .                               |
| S6      | Table S3. Solvent screening for the reaction between <b>1</b> and <b>2</b> catalyzed by Au/Al <sub>2</sub> O <sub>3</sub> |
| S7-S17  | <sup>1</sup> H and <sup>13</sup> C NMR data of 2-substituted-1 <i>H</i> -1,3- benzodiazoles                               |
| S18     | References                                                                                                                |
| S19-S54 | Copies of <sup>1</sup> H and <sup>13</sup> C NMR spectra of 2-substituted-1 <i>H</i> -1,3- benzodiazoles                  |

## Metal oxides as heterogeneous catalysts

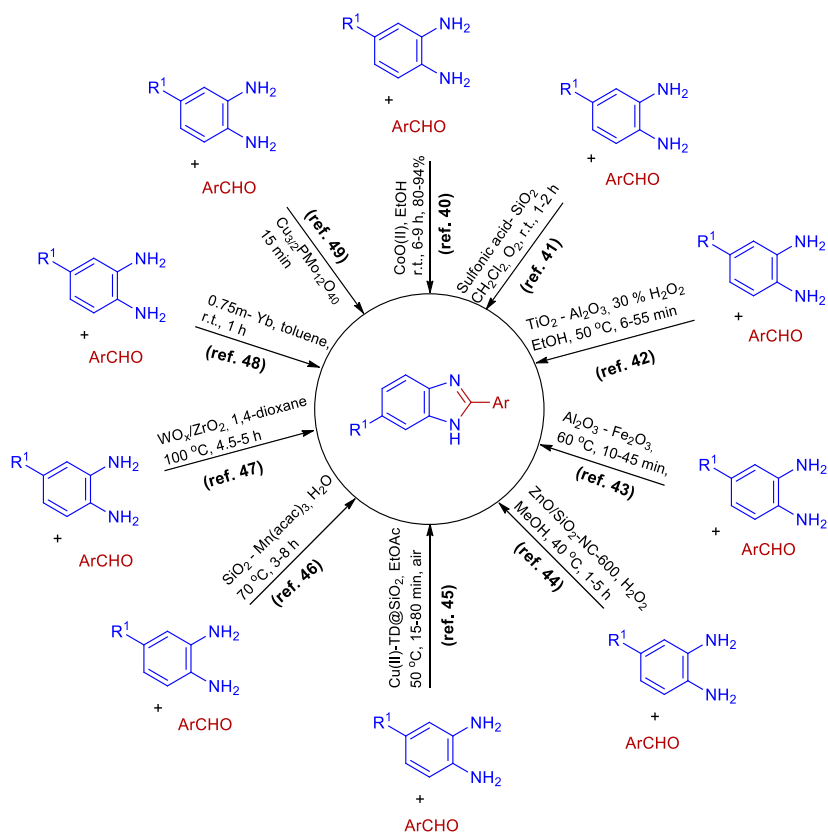

Scheme S1. Synthesis of benzimidazole derivatives using metal oxides as heterogeneous catalysts.

## Visible-Light promoted synthesis

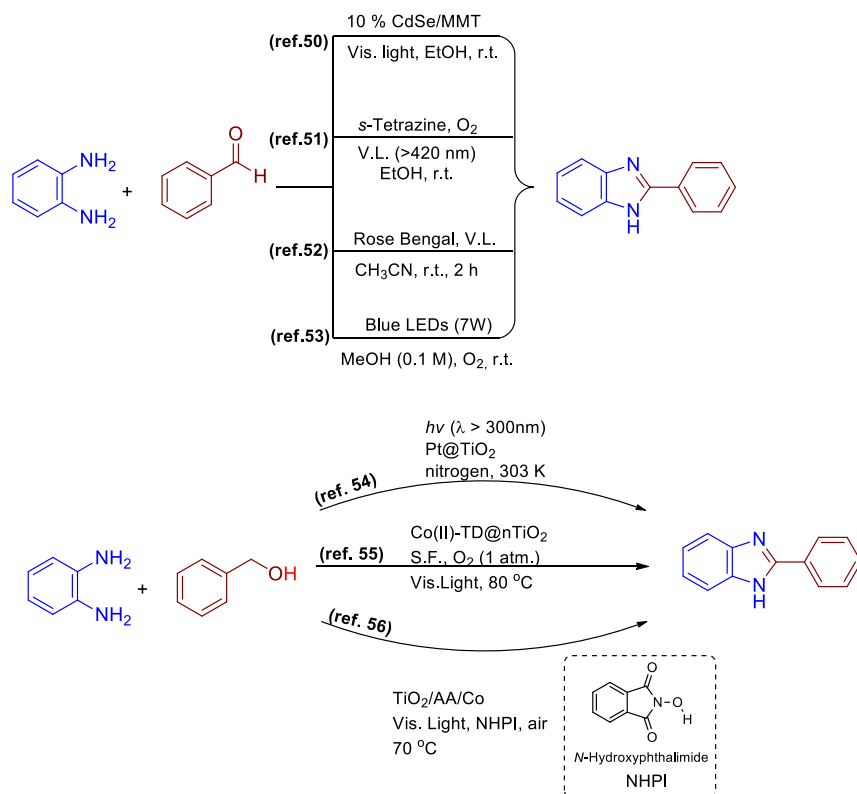

Scheme S2. Synthesis of benzimidazole derivatives under photocatalytic reactions.

**Table S1.** Homogeneous catalyst screening for the reaction between **1** and **2**.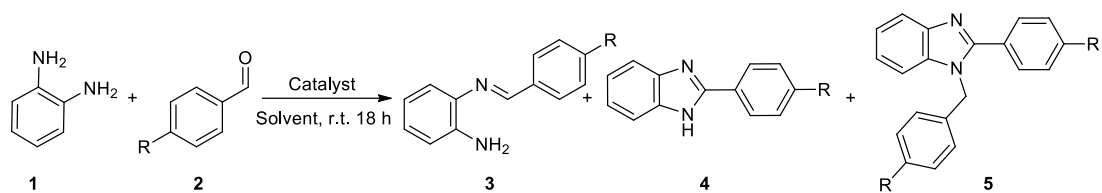

| Entry | Catalyst <sup>a</sup>                                 | Solvent            | Conversion (%) <sup>b</sup> | <b>3</b> (%) <sup>c</sup> | <b>4</b> (%) <sup>c</sup> | <b>5</b> (%) <sup>c</sup> |
|-------|-------------------------------------------------------|--------------------|-----------------------------|---------------------------|---------------------------|---------------------------|
| 1     | HAuCl <sub>4</sub>                                    | CH <sub>3</sub> CN | 100                         | -                         | 32                        | 68                        |
| 2     | HAuCl <sub>4</sub>                                    | CH <sub>3</sub> OH | 68                          | -                         | 14                        | 54                        |
| 3     | HAuCl <sub>4</sub>                                    | EtOH               | 100                         | -                         | 66                        | 34                        |
| 4     | HAuCl <sub>4</sub>                                    | 1,2-DCE            | 85                          | 51                        | 29                        | 5                         |
| 5     | HAuCl <sub>4</sub>                                    | EtOAc              | 71                          | -                         | 57                        | 14                        |
| 6     | HAuCl <sub>4</sub>                                    | Toluene            | 95                          | 32                        | 45                        | 18                        |
| 7     | AuCl                                                  | CH <sub>3</sub> CN | 82                          | -                         | 58                        | 24                        |
| 8     | AgNO <sub>3</sub>                                     | MeOH               | 100                         | -                         | 63                        | 37                        |
| 9     | Cu(ClO <sub>4</sub> ) <sub>2</sub> •6H <sub>2</sub> O | CH <sub>3</sub> CN | 100                         | -                         | 40                        | 60                        |

<sup>a</sup> Reaction conditions: *o*-phenylenediamine **1** (0.1 mmol), 4-methylbenzaldehyde **2** (0.1 mmol), catalyst (20 % mol), solvent (1 ml), at room temperature for 18 h. <sup>b</sup> Based on the consumption of **2** determined from the crude <sup>1</sup>H NMR mixture of the reaction. <sup>c</sup> Yields of **3**, **4**, **5** were determined by <sup>1</sup>H NMR from the crude reaction mixture.

**Table 2.** Heterogeneous  $M_xO_y$  screening for the reaction between **1** and **2**.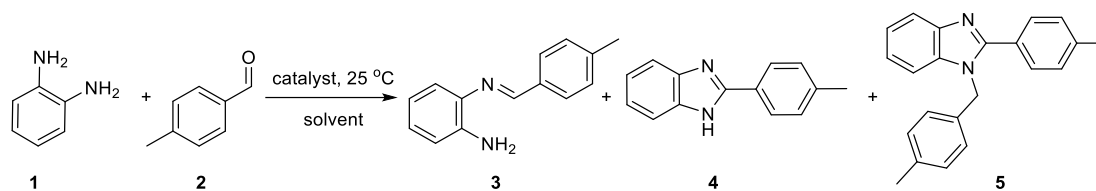

| Entry          | Catalyst                       | Solvent            | Time (h) | <b>2</b> (%) <sup>a</sup> | <b>3</b> (%) <sup>a</sup> | <b>4</b> (%) <sup>a</sup> | <b>5</b> (%) <sup>a</sup> |
|----------------|--------------------------------|--------------------|----------|---------------------------|---------------------------|---------------------------|---------------------------|
| 1              | SiO <sub>2</sub>               | CH <sub>3</sub> CN | 2        | 0                         | 49                        | 33                        | 13                        |
| 2              | Al <sub>2</sub> O <sub>3</sub> | CH <sub>3</sub> CN | 2        | 0                         | 44                        | 38                        | 18                        |
| 3              | Al <sub>2</sub> O <sub>3</sub> | CH <sub>3</sub> CN | 48       | 0                         | 18                        | 46                        | 36                        |
| 4              | Al <sub>2</sub> O <sub>3</sub> | MeOH               | 48       | 0                         | -                         | 40                        | 60                        |
| 5              | TiO <sub>2</sub> (Degussa)     | MeOH               | 2        | 0                         | -                         | 41                        | 59                        |
| 6              | TiO <sub>2</sub> (Degussa)     | CH <sub>3</sub> CN | 2        | 0                         | -                         | 46                        | 54                        |
| 7              | TiO <sub>2</sub> (Hombikat)    | CH <sub>3</sub> CN | 2        | 0                         | -                         | 61                        | 39                        |
| 8 <sup>b</sup> | hv/TiO <sub>2</sub> (Hombikat) | MeOH               | 1        | 0                         | -                         | 65                        | 35                        |

<sup>a</sup> Reaction conditions: 0.1 mmol of **1**, 0.1 mmol of **2**, catalyst (20 mg), 1mL of solvent, at 25 °C. Yields of **2**, **3**, **4** and **5** were determined by <sup>1</sup>H NMR from the crude reaction mixture. <sup>b</sup> Reaction conditions: **1** (0.1 mmol), **2** (0.2 mmol), TiO<sub>2</sub> (20 mg), solvent (1 ml) at Xenon Lamp for 1 h.

**Table S3.** Solvent screening for the reaction between **1** and **2** catalyzed by Au/Al<sub>2</sub>O<sub>3</sub>.

| Entry | Solvent <sup>a</sup> | Temperature (°C) | 2 (%) <sup>b</sup> | 3 (%) <sup>b</sup> | 4 (%) <sup>b</sup> | 5 (%) <sup>b</sup> |
|-------|----------------------|------------------|--------------------|--------------------|--------------------|--------------------|
| 1     | MeOH                 | r.t.             | -                  | -                  | 100                | -                  |
| 2     | MeOH (repeat of 1)   | r.t.             | -                  | 5                  | 90                 | 5                  |
| 3     | EtOAc                | r.t.             | 10                 | 33                 | 30                 | 27                 |
| 4     | CH <sub>3</sub> CN   | r.t.             | -                  | 16                 | 50                 | 34                 |
| 5     | Toluene              | r.t.             | -                  | 100                | -                  | -                  |
| 6     | Toluene              | 130              | -                  | -                  | 87                 | 13                 |

<sup>a</sup> Reaction conditions: *o*-phenylenediamine **1** (0.1 mmol), 4-methylbenzaldehyde **2** (0.1 mmol), catalyst (20 mg, 1 mol % Au loading), solvent (1 ml) for 18 h. <sup>b</sup> Yields of **2**, **3**, **4**, **5** were determined by <sup>1</sup>H NMR from the crude reaction mixture.

## $^1\text{H}$ and $^{13}\text{C}$ NMR data of 2-substituted-1*H*-1,3-benzodiazoles

**2-(4-Methylphenyl)-1*H*-1,3-benzodiazole (4)**<sup>[1],[2]</sup>: 62 mg, 99% yield, brown solid, m.p. 214-216 °C;  $^1\text{H}$  NMR (500 MHz,  $\text{CD}_3\text{OD}$ )  $\delta$  7.96 (d,  $J$  = 8.0 Hz, 2H), 7.70 (dd,  $J_1$  = 6.0 Hz,  $J_2$  = 3.0 Hz, 2H), 7.45 (dd,  $J_1$  = 6.0 Hz,  $J_2$  = 3.0 Hz, 2H), 7.41 (d,  $J$  = 8.0 Hz, 2H), 2.40 (s, 3H);  $^{13}\text{C}$  NMR (125 MHz,  $\text{CD}_3\text{OD}$ )  $\delta$  151.4, 145.2, 134.7, 131.4, 128.5, 126.6, 122.8, 115.0, 21.6; HRMS (ESI)  $[\text{M} + \text{H}]^+$  calcd for  $\text{C}_{14}\text{H}_{13}\text{N}_2$ : 209.1073, found: 209.1075.

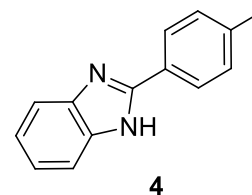

**2-Phenyl-1*H*-1,3-benzodiazole (6)**<sup>[1],[3]</sup>: 57 mg, 98% yield, brown solid, m.p. 242-244 °C;  $^1\text{H}$  NMR (500 MHz,  $\text{CD}_3\text{OD}$ )  $\delta$  8.11 (dd,  $J_1$  = 7.6 Hz,  $J_2$  = 1.5 Hz, 2H), 7.73 (dd,  $J_1$  = 6.5 Hz,  $J_2$  = 3.5 Hz, 2H), 7.65 (m, 3H), 7.47 (dd,  $J_1$  = 8.0 Hz,  $J_2$  = 3.0 Hz, 2H);  $^{13}\text{C}$  NMR (125 MHz,  $\text{CD}_3\text{OD}$ )  $\delta$  151.5, 135.3, 133.8, 130.8, 128.6, 126.5, 126.2, 115.2.; HRMS (ESI)  $[\text{M} + \text{H}]^+$  calcd for  $\text{C}_{13}\text{H}_{11}\text{N}_2$ : 195.0916, found: 195.0913.

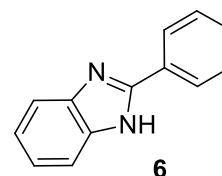

**2-(2,6-Dimethylphenyl)-1*H*-1,3-benzodiazole (7)**<sup>[5]</sup>: 43 mg, 65% yield, light yellow solid, m.p. 225-227 °C;  $^1\text{H}$  NMR (500 MHz,  $\text{CD}_3\text{OD}$ )  $\delta$  7.60 (m, 2H), 7.28 (m, 3H), 7.17 (d,  $J$  = 7.5 Hz, 2H), 2.14 (s, 6H);  $^{13}\text{C}$  NMR (125 MHz,  $\text{CD}_3\text{OD}$ )  $\delta$  153.2, 139.1, 132.3, 130.7, 128.5, 124.3, 123.6, 114.0, 20.0; HRMS (ESI)  $[\text{M} + \text{H}]^+$  calcd for  $\text{C}_{15}\text{H}_{15}\text{N}_2$ : 223.1230, found: 223.1239.

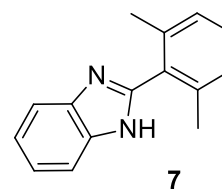

**2-(2,4,6-Trimethylphenyl)-1*H*-1,3-benzodiazole (8)**<sup>[6],[7]</sup>: 36 mg, 51% yield, yellow solid, m.p. 258-260 °C;  $^1\text{H}$  NMR (500 MHz,  $\text{CDCl}_3$ )  $\delta$  7.32 (dd,  $J$  = 5.0, 3.0 Hz, 2H), 7.18 (dd,  $J$  = 5.5, 3.0 Hz, 2H), 6.79 (s, 2H), 2.31 (s, 3H), 1.89 (s, 6H);  $^{13}\text{C}$  NMR (125 MHz,  $\text{CDCl}_3$ )  $\delta$  151.7, 139.5, 137.9, 137.6, 128.3, 128.0, 122.6, 114.9, 21.3, 19.8; HRMS (ESI)  $[\text{M} + \text{H}]^+$  calcd for  $\text{C}_{16}\text{H}_{17}\text{N}_2$ : 237.1386, found: 237.1397.

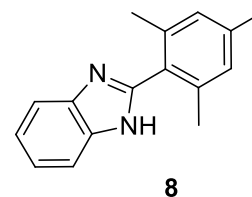

**2-(2-Methoxyphenyl)-1*H*-1,3-benzodiazole (9)**<sup>[8]</sup>: 66 mg, 98% yield, brown solid, m.p. 176-178 °C; <sup>1</sup>H NMR (500 MHz, CDCl<sub>3</sub>) δ 8.59 (d, *J* = 8.0 Hz, 1H), 7.66 (br s, 2H), 7.42 (dd shown as t, *J* = 7.0 Hz, 1H), 7.26 (dd, *J*<sub>1</sub> = 6.0 Hz, *J*<sub>2</sub> = 3.5 Hz, 2H), 7.14 (dd shown as t, *J* = 7.5 Hz, 1H), 7.06 (d, *J* = 8.0 Hz, 1H), 4.07 (s, 3H); <sup>13</sup>C NMR (125 MHz, CDCl<sub>3</sub>) δ 156.9, 150.0, 131.4, 130.3, 122.7, 121.9, 118.0, 111.6, 56.1; HRMS (ESI) [*M* + *H*]<sup>+</sup> calcd for C<sub>14</sub>H<sub>13</sub>N<sub>2</sub>O : 225.1022, found : 225.1030.

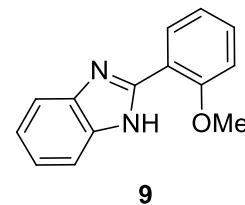

**2-(3-Methoxyphenyl)-1*H*-1,3-benzodiazole (10)**<sup>[9]</sup>: 67 mg, 99% yield, brown solid, m.p. 169-171 °C; <sup>1</sup>H NMR (500 MHz, CDCl<sub>3</sub>) δ 9.18 (br s, 1H), 7.88 (s, 1H), 7.84 (d, *J* = 7.5 Hz, 1H), 7.70 (dd, *J*<sub>1</sub> = 6.5 Hz, *J*<sub>2</sub> = 3.5 Hz, 2H), 7.26 (dd, *J*<sub>1</sub> = 6.0 Hz, *J*<sub>2</sub> = 4.0 Hz, 2H), 7.11 (dd shown as t, *J* = 8.0 Hz, 1H), 6.83 (dd, *J*<sub>1</sub> = 8.5 Hz, *J*<sub>2</sub> = 2.0 Hz, 1H); <sup>13</sup>C NMR (125 MHz, CDCl<sub>3</sub>) δ 160.2, 149.9, 134.2, 130.4, 126.0, 125.1, 120.1, 119.0, 114.5, 112.5, 55.7; HRMS (ESI) [*M* + *H*]<sup>+</sup> calcd for C<sub>14</sub>H<sub>13</sub>N<sub>2</sub>O : 225.1022, found : 225.1034.

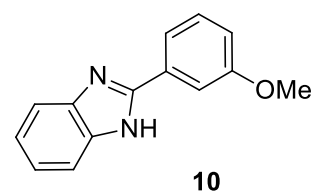

**2-(4-Methoxyphenyl)-1*H*-1,3-benzodiazole (11)**<sup>[1],[3]</sup>: 67 mg, 99% yield, brown solid, m.p. 223-225 °C; <sup>1</sup>H NMR (500 MHz, CD<sub>3</sub>OD) δ 8.06 (d, *J* = 8.0 Hz, 2H), 7.72 (dd, *J*<sub>1</sub> = 6.5 Hz, *J*<sub>2</sub> = 3.5 Hz, 2H), 7.49 (dd, *J*<sub>1</sub> = 6.0 Hz, *J*<sub>2</sub> = 3.0 Hz, 2H), 7.17 (d, *J* = 9.0 Hz, 2H), 3.89 (s, 3H); <sup>13</sup>C NMR (125 MHz, CD<sub>3</sub>OD) δ 165.1, 151.0, 133.9, 130.6, 126.8, 116.7, 116.3, 114.7, 56.3; HRMS (ESI) [*M* + *H*]<sup>+</sup> calcd for C<sub>14</sub>H<sub>13</sub>N<sub>2</sub>O : 225.1022, found : 225.1024.

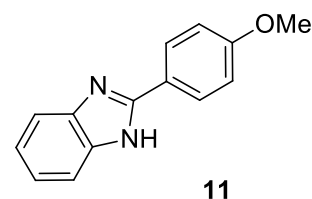

**2-(3,4-Dimethoxyphenyl)-1*H*-1,3-benzodiazole (12)**<sup>[8]</sup>: 75 mg, 98% yield, brown solid, m.p. 211-213 °C; <sup>1</sup>H NMR (500 MHz, CD<sub>3</sub>OD) δ 7.68 (s, 1H), 7.66 (dd, *J*<sub>1</sub> = 8.5 Hz, *J*<sub>2</sub> = 1.5 Hz, 1H), 7.60 (dd, *J*<sub>1</sub> = 6.0 Hz, *J*<sub>2</sub> = 3.0, 2H), 7.31 (dd, *J*<sub>1</sub> = 6.0 Hz, *J*<sub>2</sub> = 3.0, 2H), 7.10 (d, *J* = 8.5 Hz, 1H), 3.94 (s, 3H), 3.90 (s, 3H); <sup>13</sup>C NMR (125 MHz, CD<sub>3</sub>OD) δ 153.3, 152.8, 151.0, 138.0,

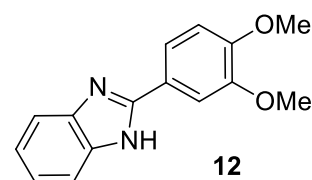



124.8, 121.5, 121.3, 115.3, 112.9, 111.2, 56.6, 56.5; HRMS (ESI)  $[M + H]^+$  calcd for  $C_{15}H_{15}N_2O_2$  : 255.1128, found : 255.1126.

**4-(1*H*-1,3-Benzodiazol-2-yl)phenol (13)**<sup>[3]</sup>: 62 mg, 98% yield, brown solid, m.p. 259-261 °C; <sup>1</sup>H NMR (500 MHz, CD<sub>3</sub>OD)  $\delta$  7.97 (d,  $J = 8.5$  Hz, 2H), 7.67 (dd,  $J_1 = 6.0$  Hz,  $J_2 = 3.0$  Hz, 2H), 7.43 (dd,  $J_1 = 6.0$  Hz,  $J_2 = 3.0$  Hz, 2H), 7.02 (d,  $J = 8.5$  Hz, 2H); <sup>13</sup>C NMR (125 MHz, CD<sub>3</sub>OD)  $\delta$  163.5, 151.8, 134.6, 130.6, 126.3, 117.6, 116.2, 114.7. HRMS (ESI)  $[M + H]^+$  calcd for  $C_{13}H_{11}N_2O$  : 211.0866, found : 211.0874.

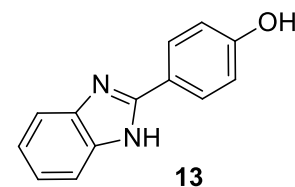

**4-(1*H*-1,3-Benzodiazol-2-yl)-1,2-benzenediol (14)**<sup>[10]</sup>: 66 mg, 98% yield, brown solid, m.p. 181-183 °C; <sup>1</sup>H NMR (500 MHz, CD<sub>3</sub>OD)  $\delta$  7.65 (dd,  $J_1 = 6.0$  Hz,  $J_2 = 3.0$  Hz, 2H), 7.54 (d,  $J = 1.5$  Hz, 1H), 7.48 (dd,  $J_1 = 8.5$  Hz,  $J_2 = 2.0$  Hz, 1H), 7.40 (dd,  $J_1 = 6.0$  Hz,  $J_2 = 3.0$  Hz, 2H), 6.98 (d,  $J = 8.0$  Hz, 1H); <sup>13</sup>C NMR (125 MHz, CD<sub>3</sub>OD)  $\delta$  152.4, 151.4, 147.6, 135.6, 125.8, 121.2, 117.6, 117.1, 115.3, 114.8; HRMS (ESI)  $[M + H]^+$  calcd for  $C_{13}H_{11}N_2O_2$  : 227.0815, found : 227.0824.

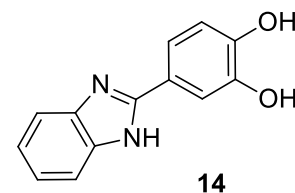

**4-(1*H*-1,3-Benzodiazol-2-yl)-phenyl acetate (15)**: 69 mg, 91% yield, yellow solid, m.p. 245-247 °C; <sup>1</sup>H NMR (500 MHz, CD<sub>3</sub>OD)  $\delta$  8.10 (d,  $J = 8.5$  Hz, 2H), 7.60 (dd,  $J_1 = 6.0$  Hz,  $J_2 = 3.0$  Hz, 2H), 7.28 (d,  $J = 8.5$  Hz, 2H), 7.25 (dd,  $J_1 = 6.0$  Hz,  $J_2 = 3.0$  Hz, 2H), 2.30 (s, 3H); <sup>13</sup>C NMR (125 MHz, CD<sub>3</sub>OD)  $\delta$  170.8, 153.8, 152.6, 129.0, 128.6, 124.0, 123.6, 116.9, 116.7, 20.9; HRMS (ESI)  $[M + H]^+$  calcd for  $C_{15}H_{13}N_2O_2$  : 253.0972, found : 253.0975.

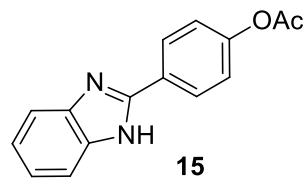

**3-(1*H*-1,3-Benzodiazol-2-yl)aniline (16)**: 43 mg, 68% yield, brown solid, m.p. 182-184 °C; <sup>1</sup>H NMR (500 MHz, CDCl<sub>3</sub>)  $\delta$  7.59 (dd,  $J_1 = 6.0$  Hz,  $J_2 = 3.5$  Hz, 2H), 7.46 (s, 1H), 7.39 (d,  $J = 7.5$  Hz, 1H), 7.22 (dd,  $J_1 = 6.0$  Hz,  $J_2 = 3.5$  Hz, 2H), 7.17 (t,  $J = 7.5$  Hz, 1H), 6.70 (dd,  $J_1 = 8.0$  Hz,  $J_2 = 2.0$  Hz, 1H); <sup>13</sup>C NMR

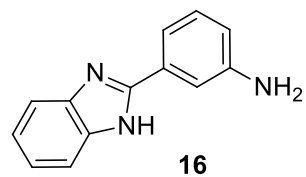

(125 MHz, CDCl<sub>3</sub>)  $\delta$  152.2, 147.2, 130.8, 130.0, 122.9, 117.0, 116.7, 113.4; HRMS (ESI) [M + H]<sup>+</sup> calcd for C<sub>13</sub>H<sub>12</sub>N<sub>3</sub> : 210.1026, found : 210.1024.

**2-([1,1'-Biphenyl]-4-yl)-1H-1,3-benzodiazole (17)**<sup>[2]</sup>: 65 mg, 80% yield, brown solid, m.p. 288-290 °C; <sup>1</sup>H NMR (500 MHz, CD<sub>3</sub>OD)  $\delta$  8.17 (d, *J* = 8.5 Hz, 2H), 7.89 (d, *J* = 8.5 Hz, 2H), 7.75 (dd, *J*<sub>1</sub> = 6.0 Hz, *J*<sub>2</sub> = 3.0 Hz, 2H), 7.70 (d, *J* = 8.0 Hz, 2H), 7.51 – 7.46 (m, 4H), 7.40 (t, *J* = 7.5 Hz, 1H); <sup>13</sup>C NMR (125 MHz, CD<sub>3</sub>OD)  $\delta$  151.3, 146.7, 140.4, 135.2, 130.2, 129.6, 129.1, 128.1, 126.6, 124.7, 115.2; HRMS (ESI) [M + H]<sup>+</sup> calcd for C<sub>19</sub>H<sub>15</sub>N<sub>2</sub> : 271.1230, found : 271.1230.

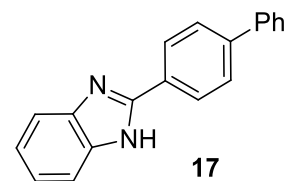

**2-(4-Chlorophenyl)-1H-1,3-benzodiazole (18)**<sup>[1],[3],[2]</sup>: 67 mg, 98% yield, light yellow solid, m.p. 288-289 °C; <sup>1</sup>H NMR (500 MHz, CD<sub>3</sub>OD)  $\delta$  8.11 (d, *J* = 9.0 Hz, 1H), 7.77 (dd, *J*<sub>1</sub> = 6.0 Hz, *J*<sub>2</sub> = 3.0 Hz, 1H), 7.70 (d, *J* = 8.5 Hz, 1H), 7.53 (dd, *J*<sub>1</sub> = 6.0 Hz, *J*<sub>2</sub> = 3.0 Hz, 1H); <sup>13</sup>C NMR (125 MHz, CD<sub>3</sub>OD)  $\delta$  152.2, 137.3, 132.1, 130.3, 129.7, 129.3, 129.1, 124.1; HRMS (ESI) [M + H]<sup>+</sup> calcd for C<sub>13</sub>H<sub>10</sub>ClN<sub>2</sub> : 229.0527, found : 229.0528.

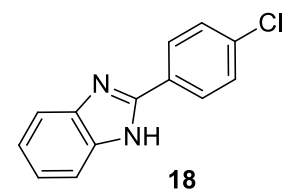

**2-(3-Chlorophenyl)-1H-1,3-benzodiazole (19)**: 68 mg, 98% yield, orange semisolid; <sup>1</sup>H NMR (500 MHz, CD<sub>3</sub>OD)  $\delta$  8.12 (d, *J* = 2.0 Hz, 1H), 8.02 (dt, *J*<sub>1</sub> = 7.0 Hz, *J*<sub>2</sub> = 1.5 Hz, 1H), 7.71 (dd, *J*<sub>1</sub> = 6.0 Hz, *J*<sub>2</sub> = 3.0 Hz, 2H), 7.62 (m, 2H), 7.45 (dd, *J*<sub>1</sub> = 6.0 Hz, *J*<sub>2</sub> = 3.0 Hz, 2H); <sup>13</sup>C NMR (125 MHz, CD<sub>3</sub>OD)  $\delta$  150.2, 136.6, 135.8, 133.3, 132.3, 128.6, 128.4, 126.8, 126.5, 115.4; HRMS (ESI) [M + H]<sup>+</sup> calcd for C<sub>13</sub>H<sub>10</sub>ClN<sub>2</sub> : 229.0527, found : 229.0528.

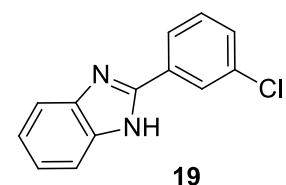

**2-(2,6-Dichlorophenyl)-1H-1,3-benzodiazole (20)**: 77 mg, 96% yield, yellow solid, m.p. 247-249 °C; <sup>1</sup>H NMR (500 MHz, CD<sub>3</sub>OD)  $\delta$  7.66 (dd, *J*<sub>1</sub> = 6.5 Hz, *J*<sub>2</sub> = 3.5 Hz, 2H), 7.57 – 7.51 (m, 3H), 7.34 (dd, *J*<sub>1</sub> = 6.0 Hz, *J*<sub>2</sub> = 3.5 Hz, 2H); <sup>13</sup>C NMR (125 MHz, CD<sub>3</sub>OD)  $\delta$  148.2, 138.8, 137.2, 133.6, 130.6, 129.4,

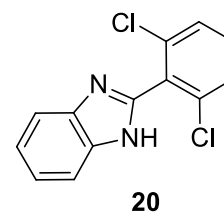

124.5, 116.2; HRMS (ESI)  $[M + H]^+$  calcd for  $C_{13}H_9Cl_2N_2$  : 263.0137, found : 263.0143.

**2-(2-Bromophenyl)-1H-1,3-benzodiazole (21)**: 73 mg, 89% yield, light yellow solid, m.p. 243-244 °C;  $^1H$  NMR (600 MHz,  $CD_3OD$ )  $\delta$  7.79 (d,  $J = 7.8$  Hz, 1H), 7.72 (d,  $J = 7.8$  Hz, 1H), 7.64 (br s, 2H), 7.52 (t,  $J = 7.2$  Hz, 1H), 7.44 (t,  $J = 7.8$  Hz, 1H), 7.30 (dd,  $J_1 = 6.0$  Hz,  $J_2 = 3.0$  Hz, 2H);  $^{13}C$  NMR (150 MHz,  $CD_3OD$ )  $\delta$  152.3, 134.7, 133.5, 133.2, 132.6, 128.8, 124.0, 123.2; HRMS (ESI)  $[M + H]^+$  calcd for  $C_{13}H_{10}BrN_2$  : 273.0022/275.0002, found : 273.0027/275.0007.

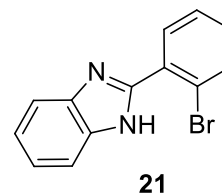

**Methyl 4-(1H-1,3-benzodiazol-2-yl)benzoate (22)**: 67 mg, 88% yield, light yellow solid, m.p. 196-198 °C;  $^1H$  NMR (500 MHz,  $CD_3OD$ )  $\delta$  8.19 – 8.14 (m, 4H), 7.70 (dd,  $J_1 = 6.0$  Hz,  $J_2 = 3.0$  Hz, 2H), 7.42 (dd,  $J_1 = 6.5$  Hz,  $J_2 = 3.5$  Hz, 2H), 3.93 (s, 3H);  $^{13}C$  NMR (125 MHz,  $CD_3OD$ )  $\delta$  167.3, 150.8, 137.1, 133.9, 131.9, 131.4, 128.3, 126.0, 115.7, 53.0; HRMS (ESI)  $[M + H]^+$  calcd for  $C_{15}H_{13}N_2O_2$  : 253.0972, found : 253.0973.

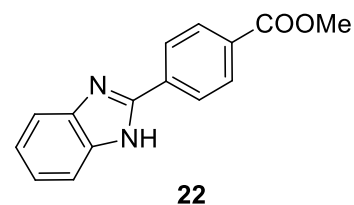

**4-(1H-1,3-Benzodiazol-2-yl)benzoic acid (23)**: 70 mg, 98% yield, light yellow solid, m.p. 295-297 °C;  $^1H$  NMR (500 MHz, DMSO)  $\delta$  8.29 (d,  $J = 7.5$  Hz, 2H), 8.11 (d,  $J = 8.0$  Hz, 2H), 7.63 (dd shown as s, 2H), 7.25 – 7.20 (dd shown as m, 2H).  $^{13}C$  NMR (125 MHz, DMSO)  $\delta$  166.7, 148.7, 135.1, 133.4, 130.2, 129.9, 127.7, 124.8, 114.8; HRMS (ESI)  $[M + H]^+$  calcd for  $C_{14}H_{11}N_2O_2$  : 239.0815, found : 239.0813.

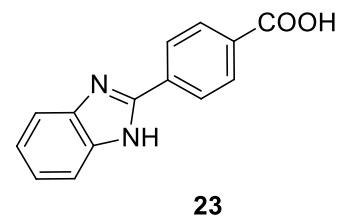

**4-(1H-1,3-Benzodiazol-2-yl)benzonitrile (24)**<sup>[2]</sup>: 65 mg, 98% yield, orange solid, m.p. 264-266 °C;  $^1H$  NMR (500 MHz,  $CD_3OD$ )  $\delta$  8.26 (d,  $J = 8.5$  Hz, 2H), 7.99 (d,  $J = 8.5$  Hz, 2H), 7.75 (dd,  $J_1 = 6.0$  Hz,  $J_2 = 3.0$  Hz, 2H), 7.47 (dd,  $J_1 = 6.0$  Hz,  $J_2 = 3.0$  Hz, 2H);  $^{13}C$  NMR (125 MHz,  $CD_3OD$ )  $\delta$  150.1, 137.0,

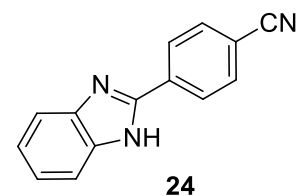

134.4, 131.9, 129.0, 126.4, 118.9, 116.1, 115.8; HRMS (ESI)  $[M + H]^+$  calcd for  $C_{14}H_{10}N_3$  : 220.0869, found : 220.0869.

**2-(3-Nitrophenyl)-1H-1,3-benzodiazole (25)**<sup>[31]</sup>: 70 mg, 97% yield, brown solid, m.p. 180-181 °C; <sup>1</sup>H NMR (500 MHz,  $CDCl_3$ )  $\delta$  8.86 (s, 1H), 8.51 (d,  $J = 8.0$  Hz, 1H), 8.19 (dd,  $J_1 = 8.0$  Hz,  $J_2 = 1.0$  Hz, 1H), 7.69 (dd,  $J_1 = 6.0$  Hz,  $J_2 = 3.0$  Hz, 2H), 7.58 (dd shown as t,  $J = 8.0$  Hz, 1H), 7.30 (dd,  $J_1 = 6.0$  Hz,  $J_2 = 3.0$  Hz, 2H); <sup>13</sup>C NMR (125 MHz,  $CDCl_3$ )  $\delta$  149.4, 148.7, 132.8, 131.6, 130.3, 124.6, 123.9, 121.4, 115.7; HRMS (ESI)  $[M + H]^+$  calcd for  $C_{13}H_{10}N_3O_2$  : 240.0767, found : 240.0768.

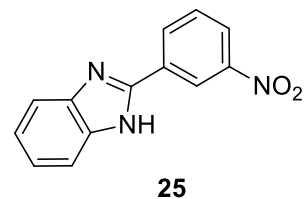

**2-(Naphthalen-1-yl)-1H-1,3-benzodiazole (26)**<sup>[31]</sup>: 63 mg, 86% yield, white solid, m.p. 298-300 °C; <sup>1</sup>H NMR (500 MHz,  $CD_3OD$ )  $\delta$  8.46 (m, 1H), 8.05 (d,  $J = 8.5$  Hz, 1H), 7.99 (m, 1H), 7.87 (dd,  $J_1 = 7.0$  Hz,  $J_2 = 1.0$  Hz, 1H), 7.68 (br, 2H), 7.63 (dd,  $J_1 = 6.5$  Hz,  $J_2 = 1.0$  Hz, 1H), 7.55–7.59 (m, 2H), 7.32 (m, 2H); <sup>13</sup>C NMR (125 MHz,  $CD_3OD$ )  $\delta$  153.3, 135.4, 132.6, 131.6, 129.6, 129.29, 129.28, 128.2, 127.5, 126.7, 126.1, 123.9, 116.3; <sup>1</sup>H NMR (500 MHz,  $DMSO-d_6$ )  $\delta$  9.14 (d,  $J = 8.5$  Hz, 1H), 8.09 (d,  $J = 8.5$  Hz, 1H), 8.03 (t,  $J = 8.5$  Hz, 2H), 7.68 (m, 3H), 7.65–7.60 (m, 2H); <sup>13</sup>C NMR (125 MHz,  $DMSO-d_6$ )  $\delta$  151.6, 133.6, 130.5, 130.1, 128.4, 127.9, 127.7, 127.0, 126.4, 126.3, 125.3, 122.0, 115.2; HRMS (ESI)  $[M + H]^+$  calcd for  $C_{17}H_{13}N_2$  : 245.1073, found : 245.1079.

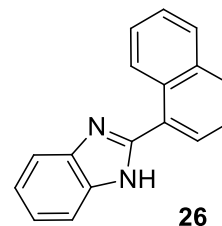

**2-(Furan-2-yl)-1H-1,3-benzodiazole (27)**<sup>[11],[31]</sup>: 44 mg, 80% yield, dark brown solid, m.p. 221-223 °C; <sup>1</sup>H NMR (500 MHz,  $CD_3OD$ )  $\delta$  7.88 (dd shown as s, 1H), 7.63 (dd,  $J_1 = 5.5$  Hz,  $J_2 = 3.0$  Hz, 2H), 7.38 (dd,  $J_1 = 6.0$  Hz,  $J_2 = 3.0$  Hz, 3H), 6.75 (dd shown as d,  $J = 1.5$  Hz, 1H); <sup>13</sup>C NMR (125 MHz,  $CD_3OD$ )  $\delta$  147.7, 143.6, 143.3, 136.3, 125.8, 115.3, 115.1, 113.9; HRMS (ESI)  $[M + H]^+$  calcd for  $C_{11}H_9N_2O$  : 185.0709, found : 185.0708.

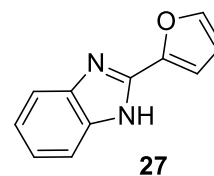

**[5-(1*H*-1,3-Benzodiazol-2-yl)furan-2-yl]methanol (28)**<sup>[11]</sup>: 61 mg, 95% yield, dark brown solid, m.p. 203-205 °C; <sup>1</sup>H NMR (500 MHz, CD<sub>3</sub>OD) δ 7.60 (dd, *J*<sub>1</sub> = 6.0 Hz, *J*<sub>2</sub> = 3.5 Hz, 2H), 7.34 (dd, *J*<sub>1</sub> = 6.5 Hz, *J*<sub>2</sub> = 3.5 Hz, 2H), 7.27 (d, *J* = 3.5 Hz, 1H), 6.60 (d, *J* = 3.5 Hz, 1H), 4.66 (s, 2H); <sup>13</sup>C NMR (125 MHz, CD<sub>3</sub>OD) δ 159.9, 144.0, 143.5, 137.2, 125.3, 115.4, 115.1, 111.2, 57.4; HRMS (ESI) [M + H]<sup>+</sup> calcd for C<sub>12</sub>H<sub>11</sub>N<sub>2</sub>O<sub>2</sub> : 215.0815, found : 215.0818.

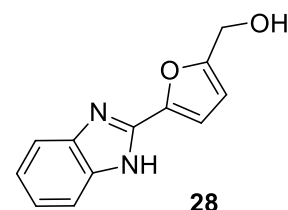

28

**2-(5-Bromofuran-2-yl)-1*H*-1,3-benzodiazole (29)**: 74 mg, 95% yield, brown oil; <sup>1</sup>H NMR (600 MHz, CD<sub>3</sub>OD) δ 7.56 (dd, *J*<sub>1</sub> = 4.8 Hz, *J*<sub>2</sub> = 3.0 Hz, 2H), 7.25 (dd, *J*<sub>1</sub> = 6.0 Hz, *J*<sub>2</sub> = 3.0 Hz, 2H), 7.15 (d, *J* = 3.6 Hz, 1H), 6.56 (d, *J* = 3.6 Hz, 1H); <sup>13</sup>C NMR (150 MHz, CD<sub>3</sub>OD) δ 148.4, 144.1, 125.5, 124.3, 116.0, 115.3, 114.1; HRMS (ESI) [M + H]<sup>+</sup> calcd for C<sub>11</sub>H<sub>8</sub>BrN<sub>2</sub>O : 262.9815/264.9794, found : 262.9814/264.9793.

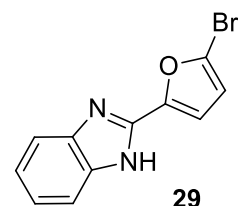

29

**2-(thiophen-2-yl)-1*H*-1,3-benzodiazole (30)**<sup>[11],[3]</sup>: 56 mg, 95% yield, brown solid, m.p. 215-217 °C; <sup>1</sup>H NMR (500 MHz, CD<sub>3</sub>OD) δ 8.04 (d, *J* = 3.5 Hz, 1H), 7.93 (d, *J* = 5.0 Hz, 1H), 7.68 (dd, *J*<sub>1</sub> = 6.0 Hz, *J*<sub>2</sub> = 3.0 Hz, 2H), 7.46 (dd, *J*<sub>1</sub> = 6.0 Hz, *J*<sub>2</sub> = 3.0 Hz, 2H), 7.34 (dd shown as t, *J* = 4 Hz, 1H); <sup>13</sup>C NMR (125 MHz, CD<sub>3</sub>OD) δ 146.7, 134.9, 133.7, 132.61, 132.6, 130.2, 127.6, 126.6, 114.9; HRMS (ESI) [M + H]<sup>+</sup> calcd for C<sub>11</sub>H<sub>9</sub>N<sub>2</sub>S : 201.0480, found : 201.0478.

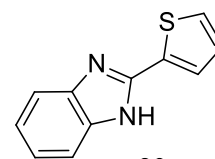

30

**3-(1*H*-1,3-Benzodiazol-2-yl)-6-isopropyl-4*H*-chromen-4-one (31)**: 88 mg, 96% yield, yellow solid, m.p. 225-227 °C; <sup>1</sup>H NMR (500 MHz, CDCl<sub>3</sub>) δ 11.88 (br s, 1H), 9.35 (s, 1H), 8.18 (d, *J* = 2.0 Hz, 1H), 7.64 (dd, *J*<sub>1</sub> = 8.5 Hz, *J*<sub>2</sub> = 2.0 Hz, 3H), 7.52 (d, *J* = 8.5 Hz, 1H), 7.28 (dd, *J*<sub>1</sub> = 6.0 Hz, *J*<sub>2</sub> = 3.0 Hz, 2H), 3.03 – 3.05 (m, 1H), 1.34 (s, 3H), 1.33 (s, 3H); <sup>13</sup>C NMR (125 MHz, CDCl<sub>3</sub>) δ 176.7, 157.5, 154.7, 147.4, 146.4, 133.7, 123.8, 123.0, 122.8,

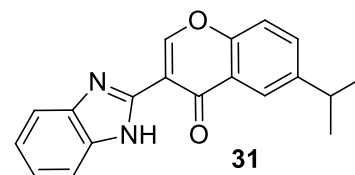

31

118.6, 113.7, 34.0, 24.0 (2C); HRMS (ESI)  $[M + H]^+$  calcd for  $C_{19}H_{17}N_2O_2$  : 305.1284, found : 305.1281.

**(E)-2-(2-Phenylethenyl)-1H-1,3-benzodiazole (32)**<sup>[3]</sup>: 63 mg, 96% yield, light yellow solid, m.p. 164-166 °C; <sup>1</sup>H NMR (500 MHz, CD<sub>3</sub>OD)  $\delta$  7.60 – 7.56 (m, 3H), 7.53 (dd,  $J_1 = 6.0$  Hz,  $J_2 = 3.5$  Hz, 2H), 7.36 (t,  $J = 7.5$  Hz, 2H), 7.31 (d,  $J = 7.0$  Hz, 1H), 7.22 (dd,  $J_1 = 6.0$  Hz,  $J_2 = 3.0$  Hz, 2H), 7.13 (d,  $J = 16.5$  Hz, 1H); <sup>13</sup>C NMR (125 MHz, CD<sub>3</sub>OD)  $\delta$  152.5, 137.1, 136.9, 130.2, 130.1, 129.9, 128.1, 124.0, 117.2, 115.6; HRMS (ESI)  $[M + H]^+$  calcd for  $C_{15}H_{13}N_2$  : 221.1063, found : 221.1054.

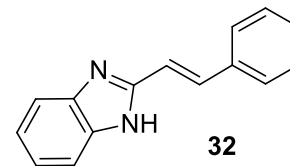

**2-(1-Phenylethyl)-1H-1,3-benzodiazole (33)**: 65 mg, 98% yield, white solid, m.p. 208-210 °C; <sup>1</sup>H NMR (600 MHz, CDCl<sub>3</sub>)  $\delta$  7.49 (dd shown as brs, 2H), 7.30 (d,  $J = 3.6$  Hz, 4H), 7.21 – 7.20 (m, 1H), 7.18 (dd,  $J_1 = 6.0$  Hz,  $J_2 = 3.6$  Hz, 2H), 4.41 (dd,  $J_1 = 14.4$  Hz,  $J_2 = 7.2$  Hz, 1H), 1.78 (d,  $J = 7.2$  Hz, 3H); <sup>13</sup>C NMR (150 MHz, CDCl<sub>3</sub>)  $\delta$  159.2, 144.4, 129.8, 128.3, 128.0, 123.3, 41.3, 20.6; HRMS (ESI)  $[M + H]^+$  calcd for  $C_{15}H_{15}N_2$  : 223.1230, found : 223.1230.

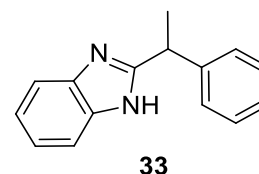

**2-(2-Phenylcyclopropyl)-1H-1,3-benzodiazole (34)**: 62 mg, 88% yield, orange semisolid; <sup>1</sup>H NMR (600 MHz, CDCl<sub>3</sub>)  $\delta$  7.52 (dd shown as br s, 2H), 7.24 (t,  $J = 7.2$  Hz, 2H), 7.20 – 7.17 (m, 3H), 7.03 (d,  $J = 7.2$  Hz, 2H), 2.68 – 2.65 (m, 1H), 2.28 (m, 1H), 2.00 (m, 1H), 1.51 (m, 1H); <sup>13</sup>C NMR (150 MHz, CDCl<sub>3</sub>)  $\delta$  155.7, 140.7, 128.6, 126.4, 126.0, 122.3, 114.6, 27.6, 21.5, 17.7; HRMS (ESI)  $[M + H]^+$  calcd for  $C_{16}H_{15}N_2$  : 235.1230, found : 235.1233.

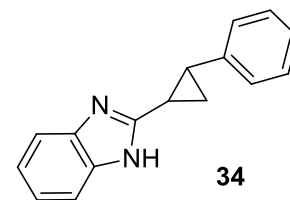

**2-(Isopropyl)-1H-1,3-benzodiazole (35)**<sup>[1],[12]</sup>: 42 mg, 87% yield, yellow solid, m.p. 160-162 °C; <sup>1</sup>H NMR (600 MHz, CDCl<sub>3</sub>)  $\delta$  7.55 (br s, 2H), 7.20 (dd,  $J_1 = 5.8$  Hz,  $J_2 = 3.0$  Hz, 2H), 3.29 (m, 1H), 1.47 (d,  $J = 6.6$  Hz, 6H); <sup>13</sup>C NMR (150 MHz,

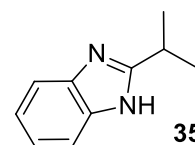

$\text{CDCl}_3$ )  $\delta$  160.2, 122.2, 114.7, 29.2, 21.7; HRMS (ESI)  $[\text{M} + \text{H}]^+$  calcd for  $\text{C}_{10}\text{H}_{13}\text{N}_2$  : 161.1073, found : 161.1074.

**2-(*sec*-Butyl)-1*H*-1,3-benzodiazole (36)**<sup>[12]</sup>: 42 mg, 80% yield, white solid, m.p. 206-208 °C;  $^1\text{H}$  NMR (600 MHz,  $\text{CDCl}_3$ )  $\delta$  10.2 (br s, 1H), 7.55 (dd,  $J_1 = 5.4$  Hz,  $J_2 = 3.0$  Hz, 2H), 7.20 (dd,  $J_1 = 6.0$  Hz,  $J_2 = 3.0$  Hz, 2H), 3.13 – 3.07 (m, 1H), 1.97 – 1.93 (m, 1H), 1.79 – 1.74 (m, 1H), 1.45 (d,  $J = 6.6$  Hz, 3H), 0.92 (t,  $J = 7.8$  Hz, 3H);  $^{13}\text{C}$  NMR (150 MHz,  $\text{CDCl}_3$ )  $\delta$  159.8, 138.4, 122.2, 114.8, 36.6, 29.5, 19.6, 12.1; HRMS (ESI)  $[\text{M} + \text{H}]^+$  calcd for  $\text{C}_{11}\text{H}_{14}\text{N}_2$  : 175.1230, found : 175.1231.

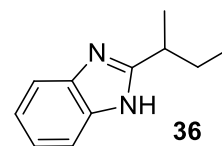

**2-Butyl-1*H*-1,3-benzodiazole (37)**<sup>[12]</sup>: 49 mg, 95% yield, light brown solid, m.p. 148-151 °C;  $^1\text{H}$  NMR (500 MHz,  $\text{CDCl}_3$ )  $\delta$  10.44 (br s, 1H), 7.54 (dd,  $J_1 = 5.5$  Hz,  $J_2 = 3.0$  Hz, 2H), 7.21 (dd,  $J_1 = 5.5$  Hz,  $J_2 = 3.0$  Hz, 2H), 2.94 (t,  $J = 8.0$  Hz, 2H), 1.82 (dd,  $J_1 = 15.0$  Hz,  $J_2 = 7.5$  Hz, 2H), 1.36 (dd,  $J_1 = 15.0$  Hz,  $J_2 = 7.5$  Hz, 2H), 0.86 (t,  $J = 7.0$  Hz, 3H);  $^{13}\text{C}$  NMR (125 MHz,  $\text{CDCl}_3$ )  $\delta$  155.6, 138.1, 122.4, 114.6, 30.5, 28.9, 22.5, 13.8; HRMS (ESI)  $[\text{M} + \text{H}]^+$  calcd for  $\text{C}_{11}\text{H}_{15}\text{N}_2$  : 175.1230, found : 175.1248.

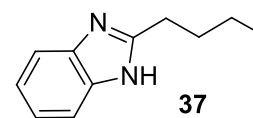

**2-Methyl-1*H*-1,3-benzodiazole (38)**<sup>[13]</sup>: 39 mg, 98% yield, yellow oil;  $^1\text{H}$  NMR (500 MHz,  $\text{CD}_3\text{OD}$ )  $\delta$  7.49 (dd,  $J_1 = 6$  Hz,  $J_2 = 3$  Hz, 2H), 7.12 (dd,  $J_1 = 6$  Hz,  $J_2 = 3$  Hz, 2H), 2.53 (s, 3H);  $^{13}\text{C}$  NMR (125 MHz,  $\text{CD}_3\text{OD}$ )  $\delta$  151.3, 121.1, 14.6; HRMS (ESI)  $[\text{M} + \text{H}]^+$  calcd for  $\text{C}_8\text{H}_9\text{N}_2$  : 133.0760, found : 133.0761.

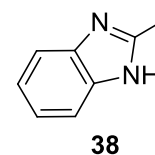

**2-Nonyl-1*H*-1,3-benzodiazole (39)**: 68 mg, 93% yield, colorless oil;  $^1\text{H}$  NMR (600 MHz,  $\text{CDCl}_3$ )  $\delta$  10.20 (s, 1H), 7.54 (dd,  $J = 5.8, 3.1$  Hz, 2H), 7.20 (dd,  $J = 5.9, 3.0$  Hz, 2H), 2.90 (t,  $J = 7.7$  Hz, 2H), 1.81 (dt,  $J = 15.3, 7.7$  Hz, 2H), 1.30 (d,  $J = 7.4$  Hz, 2H), 1.25 (d,  $J = 6.2$  Hz, 4H), 1.18 (s, 4H), 0.85 (t,  $J = 7.2$  Hz, 3H);  $^{13}\text{C}$  NMR (150 MHz,  $\text{CDCl}_3$ )  $\delta$  155.47, 137.55, 122.62,

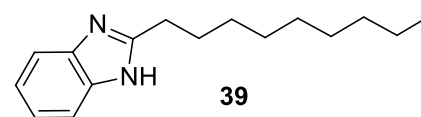

114.55, 77.37, 77.16, 76.95, 31.96, 29.57, 29.46, 29.44, 29.39, 28.97, 28.42, 22.76, 14.21; HRMS (ESI)  $[M + H]^+$  calcd for  $C_{16}H_{25}N_2$  : 245.2012, found : 245.2017.

**2-(1,3-Thiazol-5-yl)-1H-1,3-benzodiazole (44)**: 55 mg, 92% yield, yellow semi-solid;  $^1H$  NMR (600 MHz,  $CD_3OD$ )  $\delta$  9.10 (s, 1H), 8.46 (s, 1H), 7.56 (dd,  $J_1 = 6.0$  Hz,  $J_2 = 3.0$  Hz, 2H), 7.25 (dd,  $J_1 = 6.0$  Hz,  $J_2 = 3.0$  Hz, 2H);  $^{13}C$  NMR (150 MHz,  $CD_3OD$ )  $\delta$  157.3, 145.7, 143.1, 130.4, 124.5, 124.3, 116.0; HRMS (ESI)  $[M + H]^+$  calcd for  $C_{10}H_7N_3S$  : 202.0433, found : 202.0440

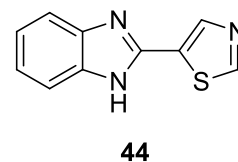



## References

- S1. Kim, Y.; Kumar, M.R.; Park, N.; Heo, Y.; Lee, S. Copper-Catalyzed, One-Pot, Three-Component Synthesis of Benzimidazoles by Condensation and C–N Bond Formation. *J. Org. Chem.* **2011**, *76*, 9577–9583, doi:10.1021/jo2019416.
- S2. Elumalai, V.; Hansen, J.H. A Green, Scalable, One-Minute Synthesis of Benzimidazoles. *Synlett* **2020**, *31*, 547–552, doi:10.1055/s-0039-1690797.
- S3. Wang, Z.; Song, T.; Yang, Y. Additive- and Oxidant-Free Expedient Synthesis of Benzimidazoles Catalyzed by Cobalt Nanocomposites on N-Doped Carbon. *Synlett* **2019**, *30*, 319–324, doi:10.1055/s-0037-1610353.
- S4. Shiraishi, Y.; Sugano, Y.; Tanaka, S.; Hirai, T. One-Pot Synthesis of Benzimidazoles by Simultaneous Photocatalytic and Catalytic Reactions on Pt@TiO<sub>2</sub> Nanoparticles. *Angew. Chem. Int. Ed.* **2010**, *122*, 1700–1704, doi:10.1002/ange.200906573.
- S5. Reddy, P.L.; Arundhathi, R.; Tripathi, M.; Rawat, D.S. CuI nanoparticles mediated expeditious synthesis of 2-substituted benzimidazoles using molecular oxygen as the oxidant. *RSC Adv.* **2016**, *6*, 53596–53601, doi:10.1039/C6RA11678G.
- S6. Khoshyan, A.; Pourtahmasb, M.; Feizpour, F.; Jafarpour, M.; Rezaeifard, A. Aerobic {Mo<sub>72</sub>V<sub>30</sub>} nanocluster-catalysed heterogeneous one-pot tandem synthesis of benzimidazoles. *Appl. Organometal. Chem.* **2018**, e4638, doi:10.1002/aoc.4638.
- S7. Wright, A.G.; Weissbach, T.; Holdcroft, S. Poly(phenylene) and *m*-Terphenyl as Powerful Protecting Groups for the Preparation of Stable Organic Hydroxides. *Angew. Chem. Int. Ed.* **2016**, *55*, 4818–4821, doi:10.1002/anie.201511184.
- S8. Maphupha, M.; Juma, W.P.; de Koning, C.B.; Brady, D. A modern and practical laccase-catalysed route suitable for the synthesis of 2-arylbenzimidazoles and 2-arylbenzothiazoles. *RSC Adv.* **2018**, *8*, 39496–39510, doi:10.1039/C8RA07377E.
- S9. Nguyen, T.B.; Le Bescont, J.; Ermolenko, L.; Al-Mourabit, A. Cobalt- and Iron-Catalyzed Redox Condensation of *o*-Substituted Nitrobenzenes with Alkylamines: A Step- and Redox-Economical Synthesis of Diazaheterocycles. *Org. Lett.* **2013**, *15*, 6218–6221, doi:10.1021/ol403064z.
- S10. Han, F.; Zhang, X.; Zhang, J.; Wei, Y.; Zhang, X.; Huang, W.; Xu, H. 3D-Encapsulated iridium-complexed nanophosphors for highly efficient host-free organic light-emitting diodes. *Chem. Commun.* **2016**, *52*, 5183–5186, doi:10.1039/C6CC01414C.
- S11. Gensberger, S.; Knabner, C.; Waibel, R.; Huppert, J.; Pischetsrieder, M. Qualitative Profiling of Polyglucose Degradation Products in Peritoneal Dialysis Fluids. *Anal. Chem.* **2015**, *87*, 6103–6111, doi:10.1021/acs.analchem.5b00665.
- S12. Zhang, C.; Zhang, L.; Jiao, N. Catalyst free approach to benzimidazoles using air as the oxidant at room temperature. *Green Chem.* **2012**, *14*, 3273, doi:10.1039/c2gc36416f.
- S13. Wade, A.R.; Pawar, H.R.; Biware, M.V.; Chikate, R.C. Synergism in semiconducting nanocomposites: visible light photocatalysis towards the formation of C–S and C–N bonds. *Green Chem.* **2015**, *17*, 3879–3888, doi:10.1039/C5GC00748H.

*Copies of <sup>1</sup>H and <sup>13</sup>C NMR spectra of 2-substituted-1H-1,3- benzodiazoles*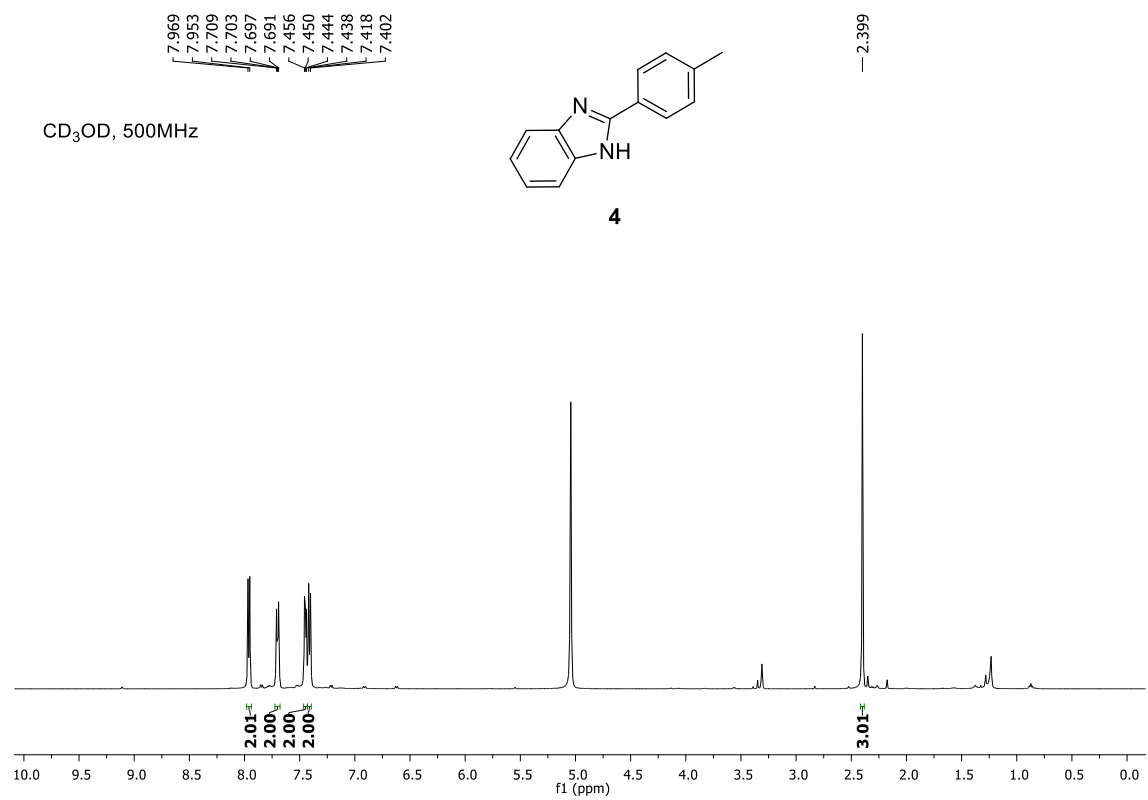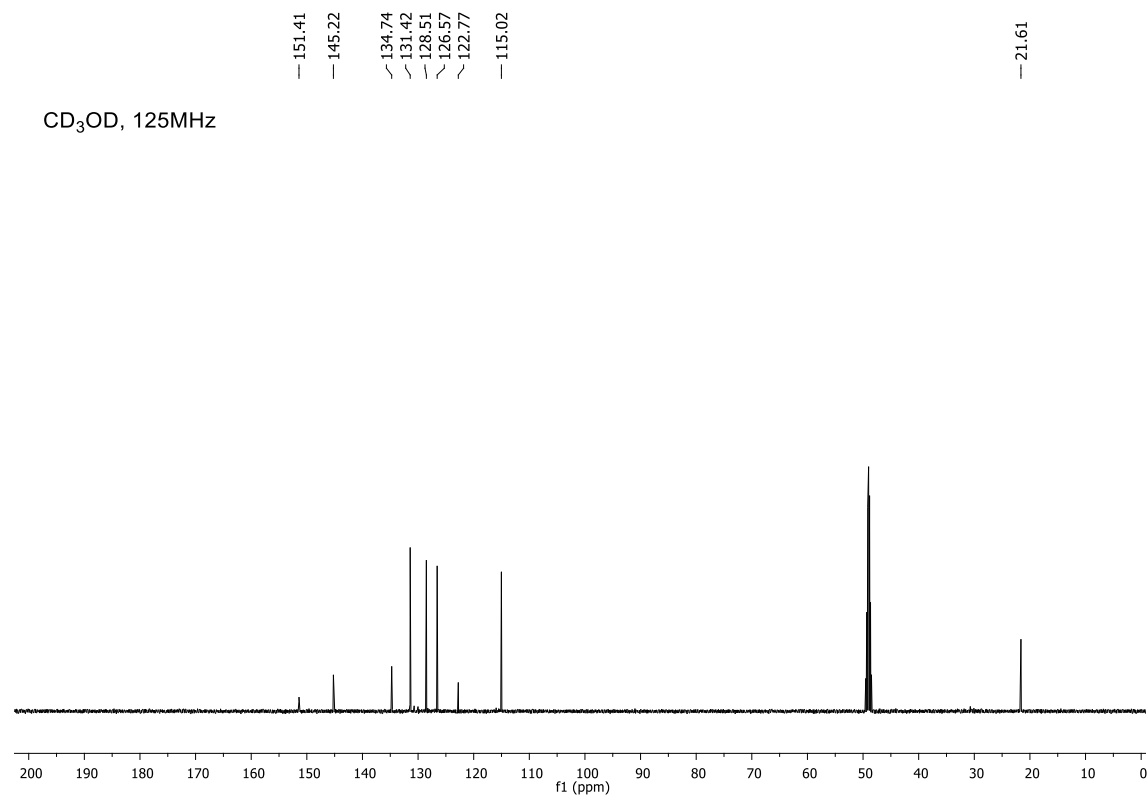

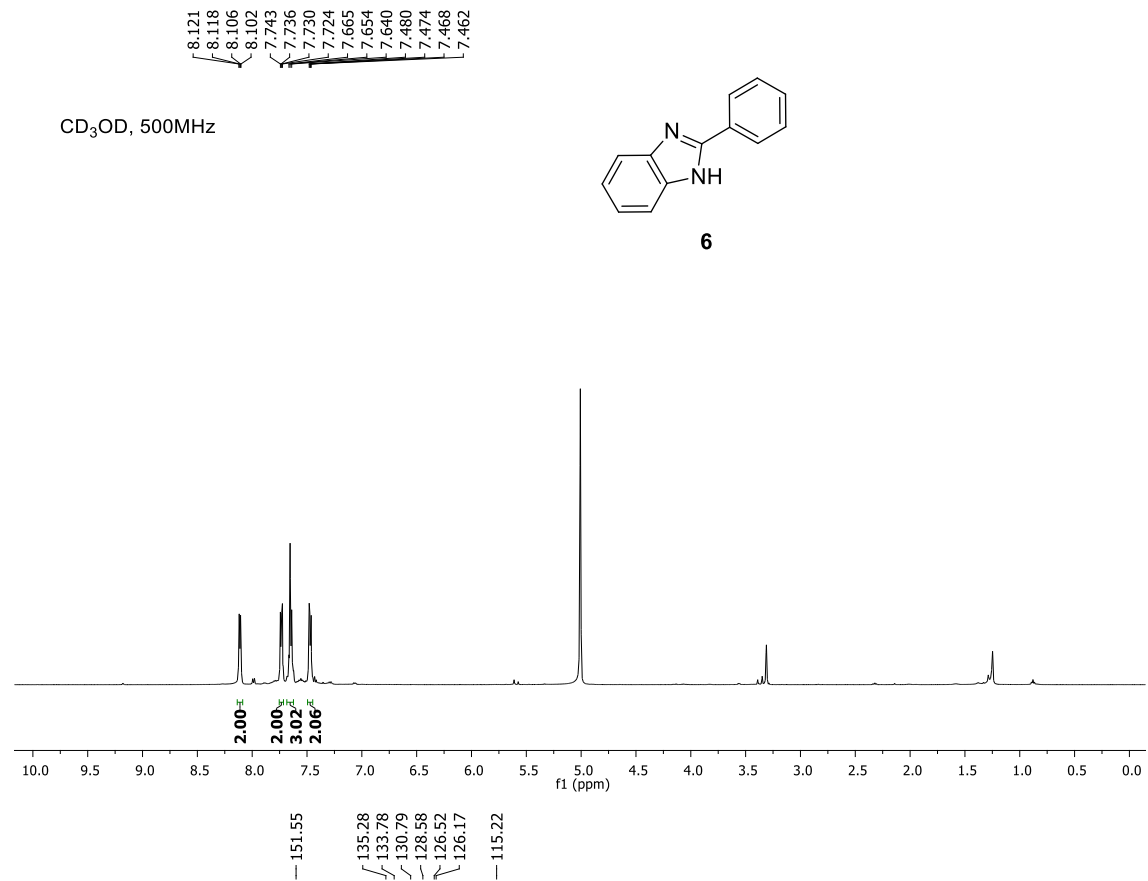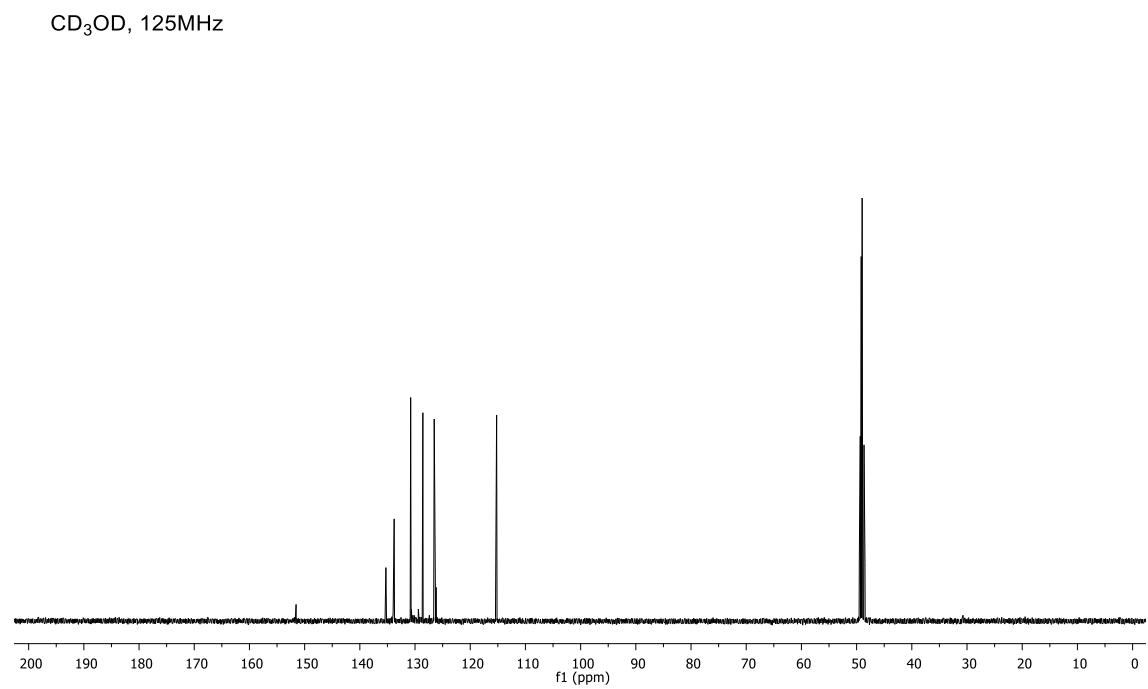

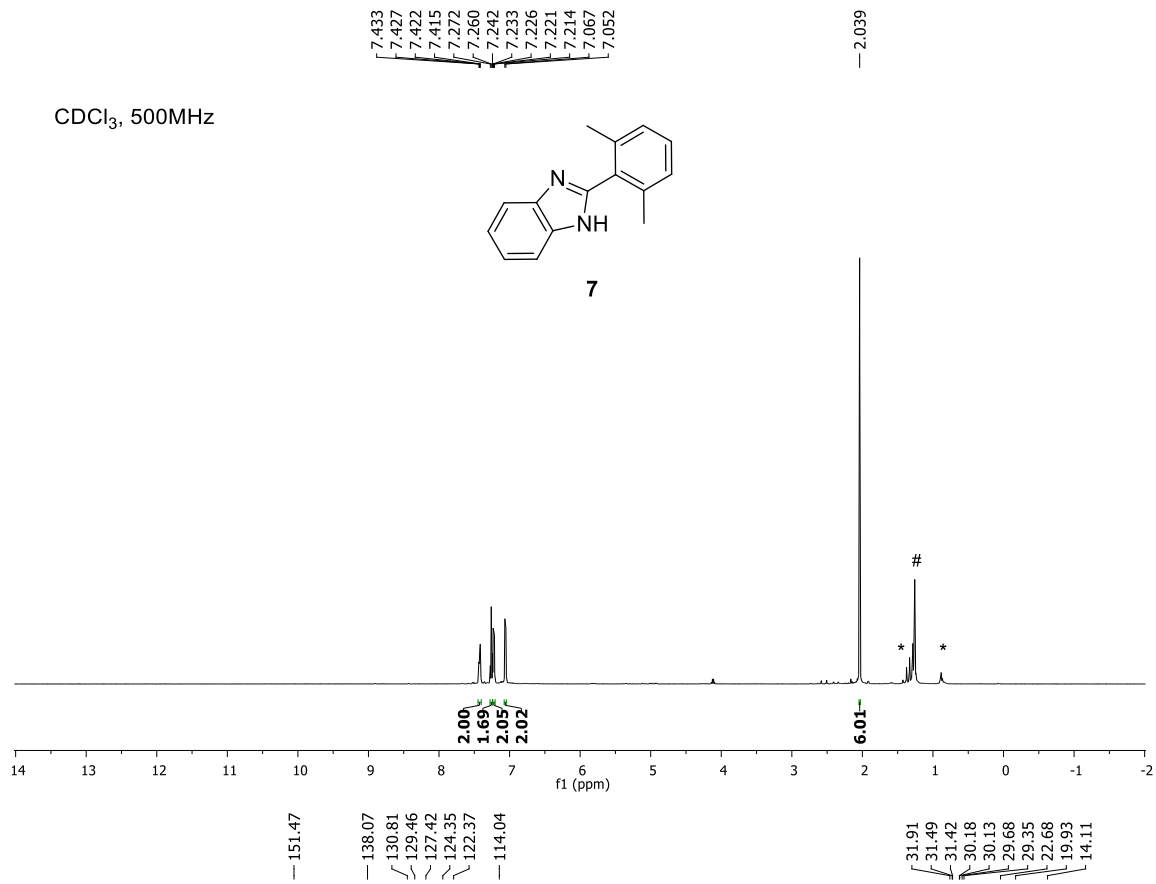

CDCl<sub>3</sub>, 125MHz

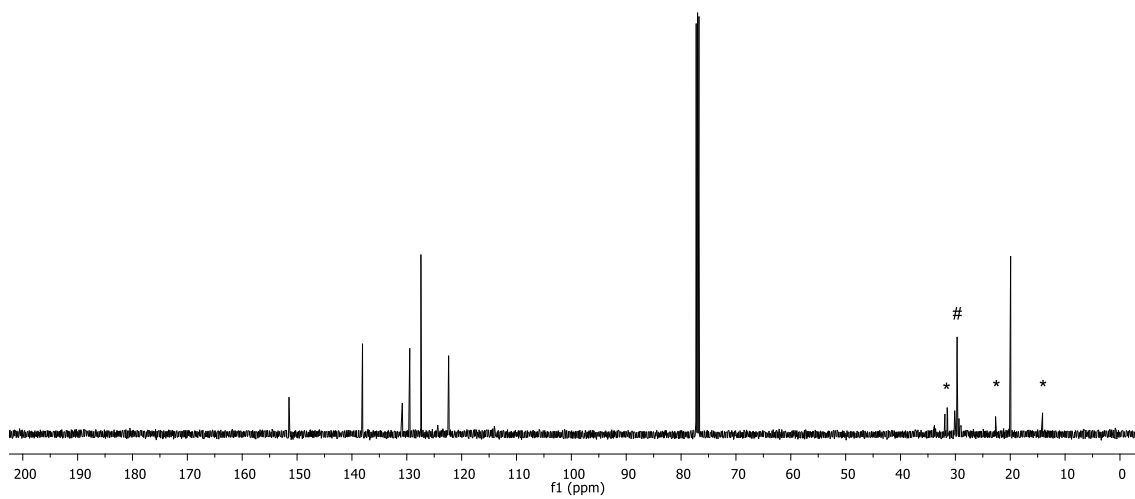

# = grease, \* = Hexane

CDCl<sub>3</sub>, 500MHz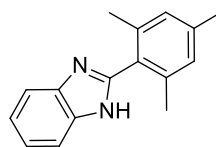

8

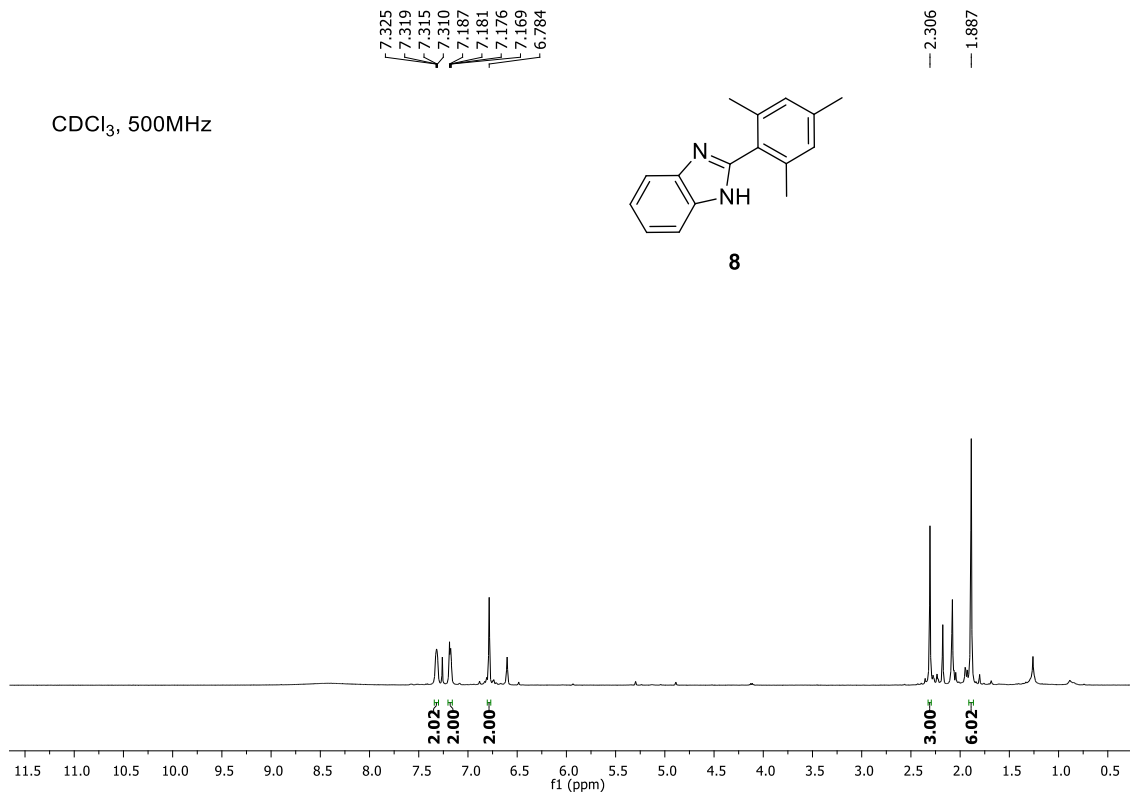CDCl<sub>3</sub>, 125MHz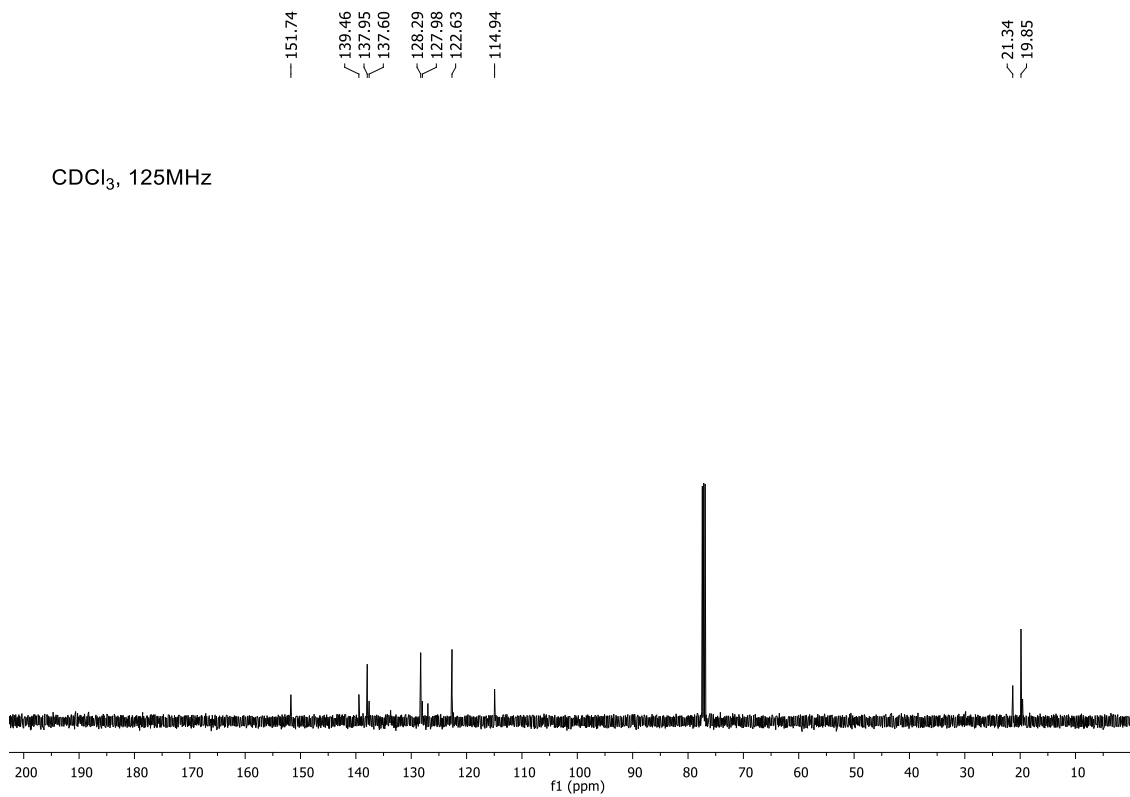

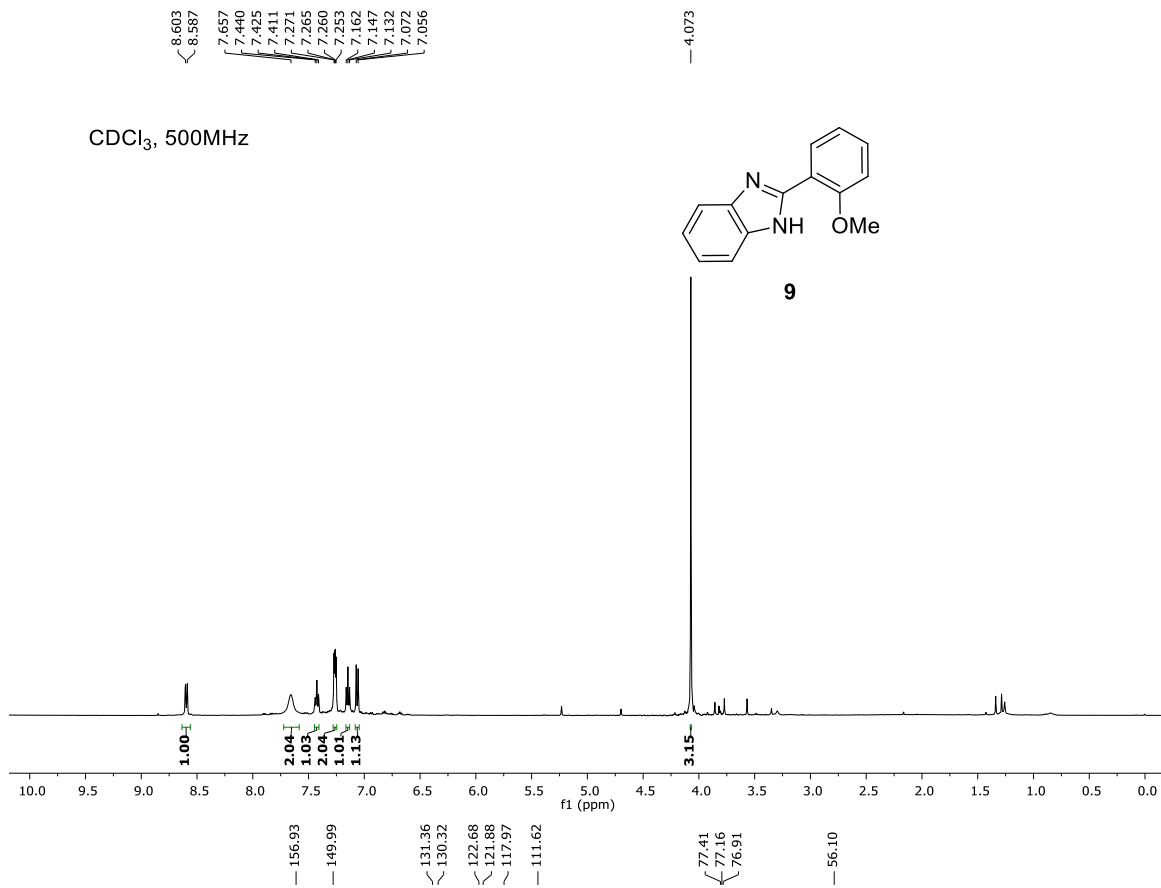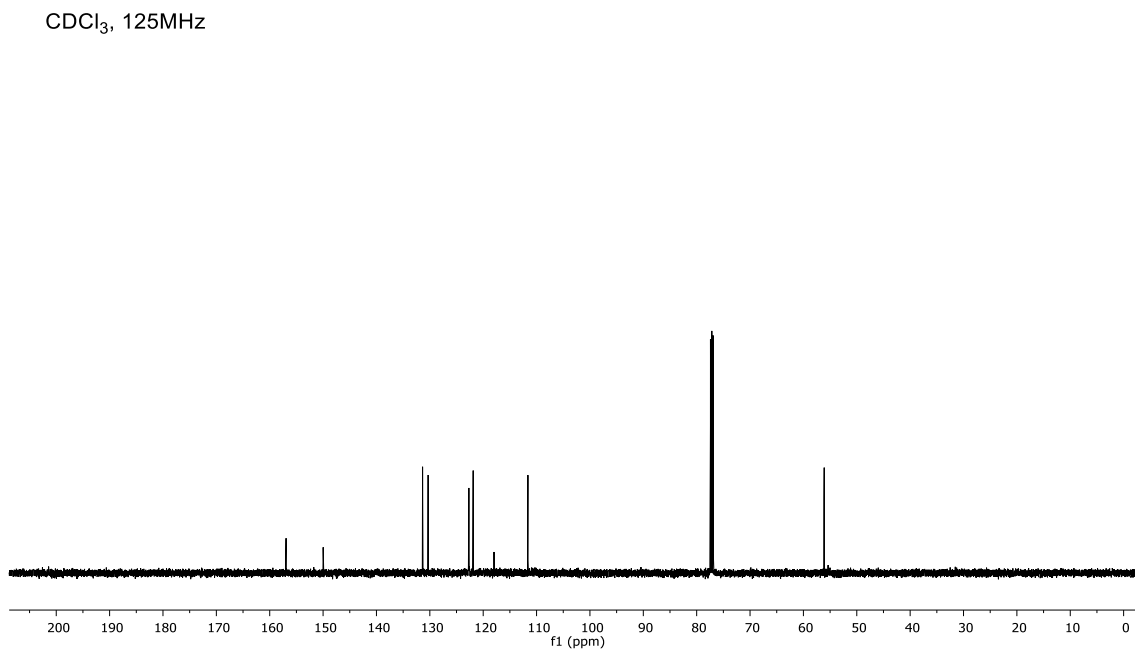

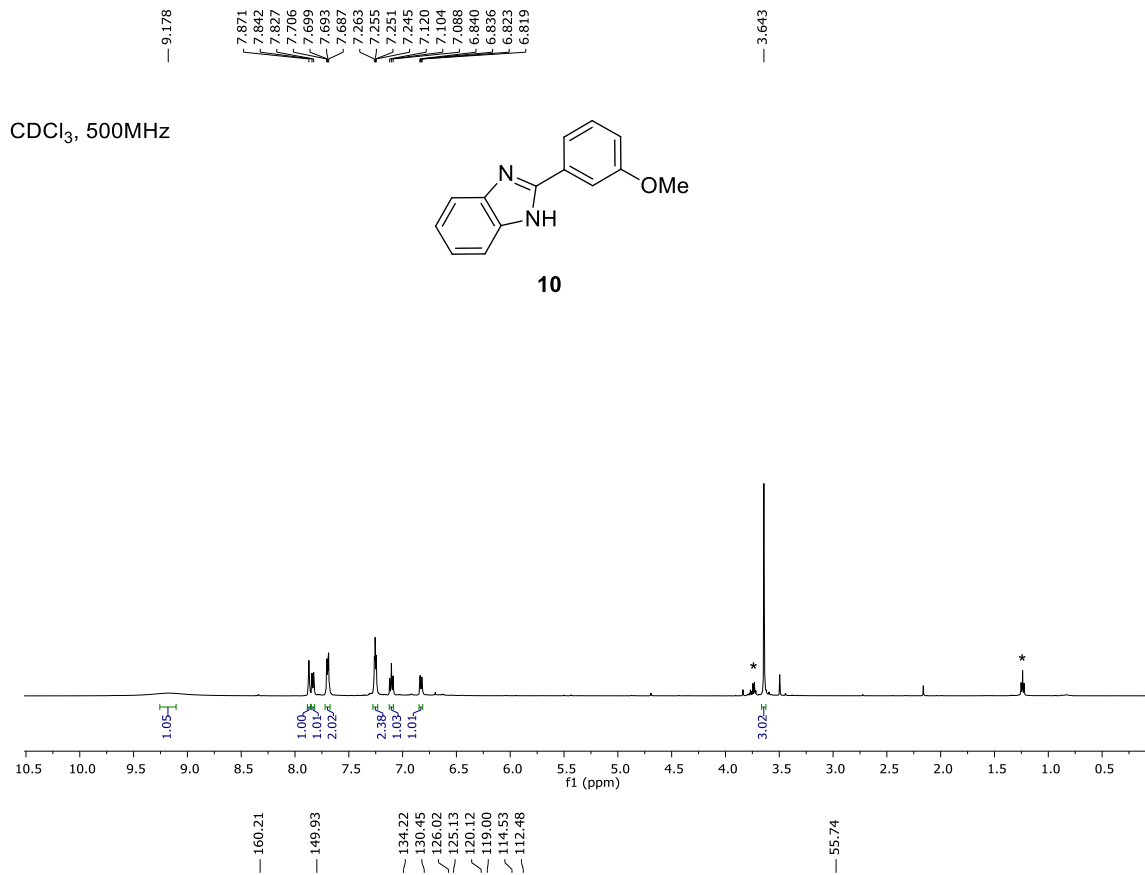

CDCl<sub>3</sub>, 125MHz

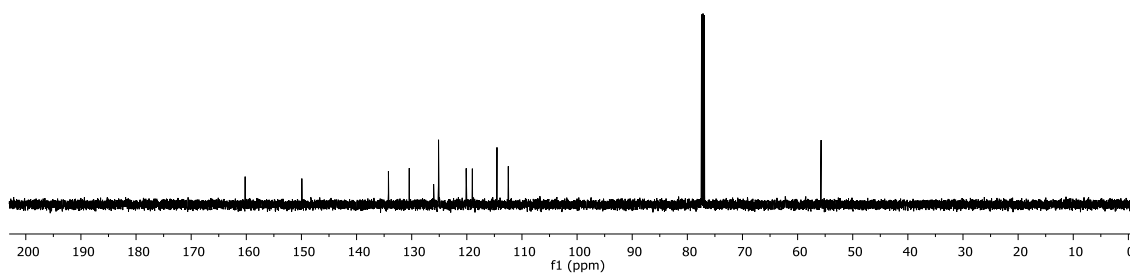

\* = Ethanol

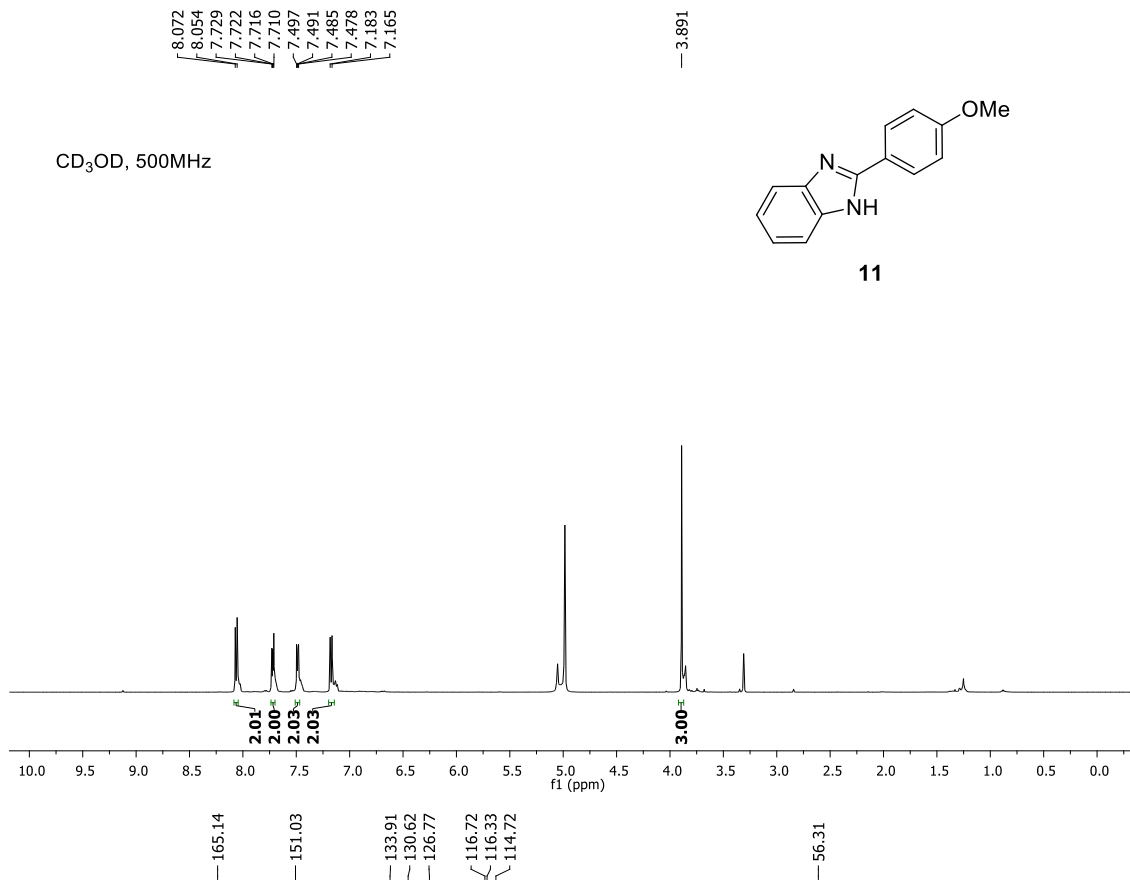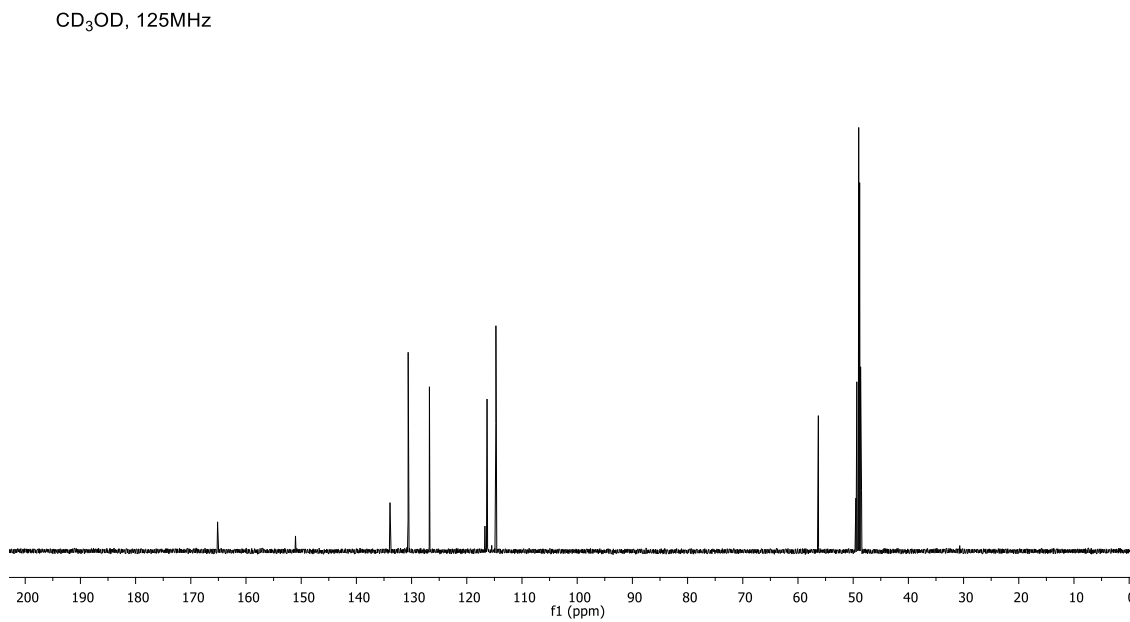



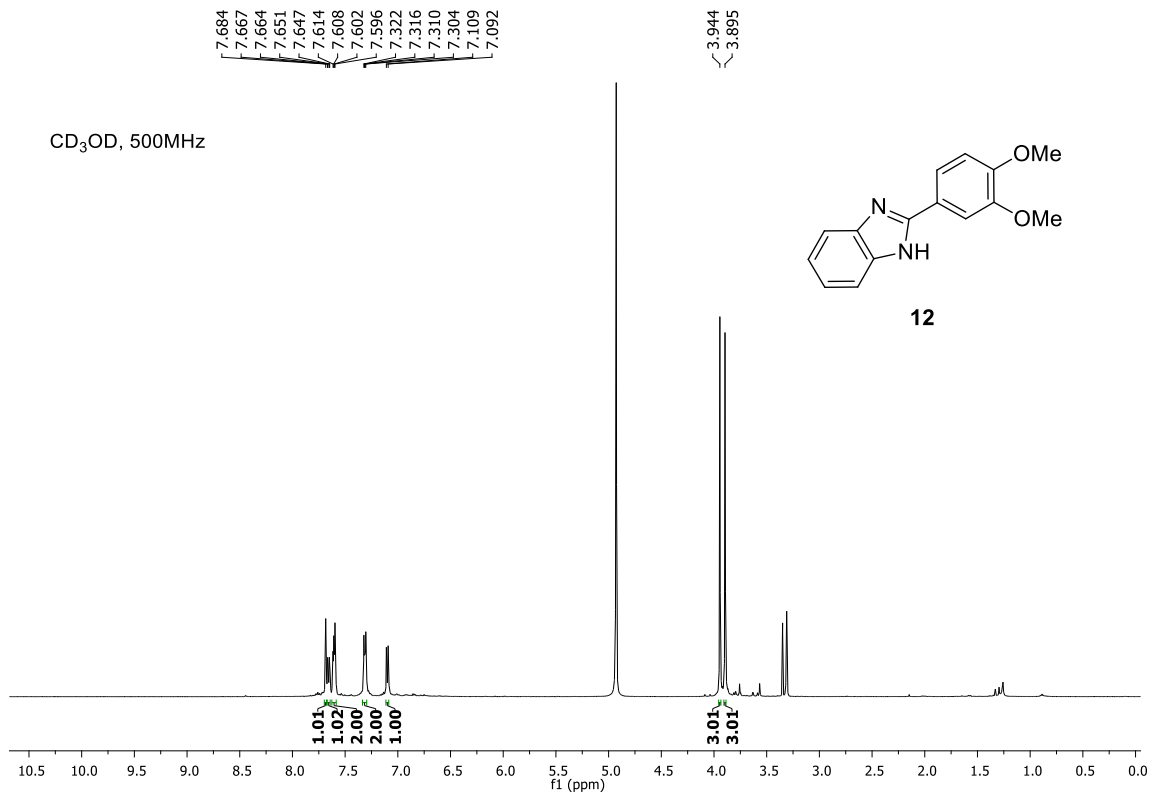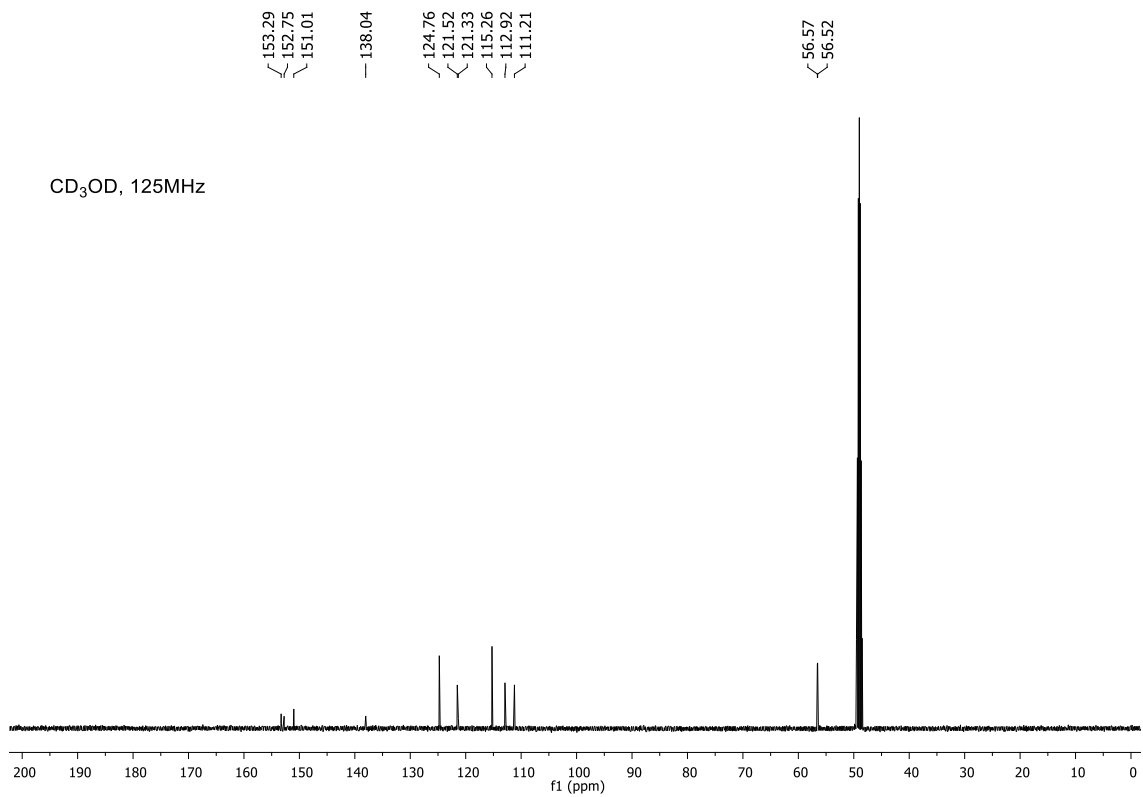

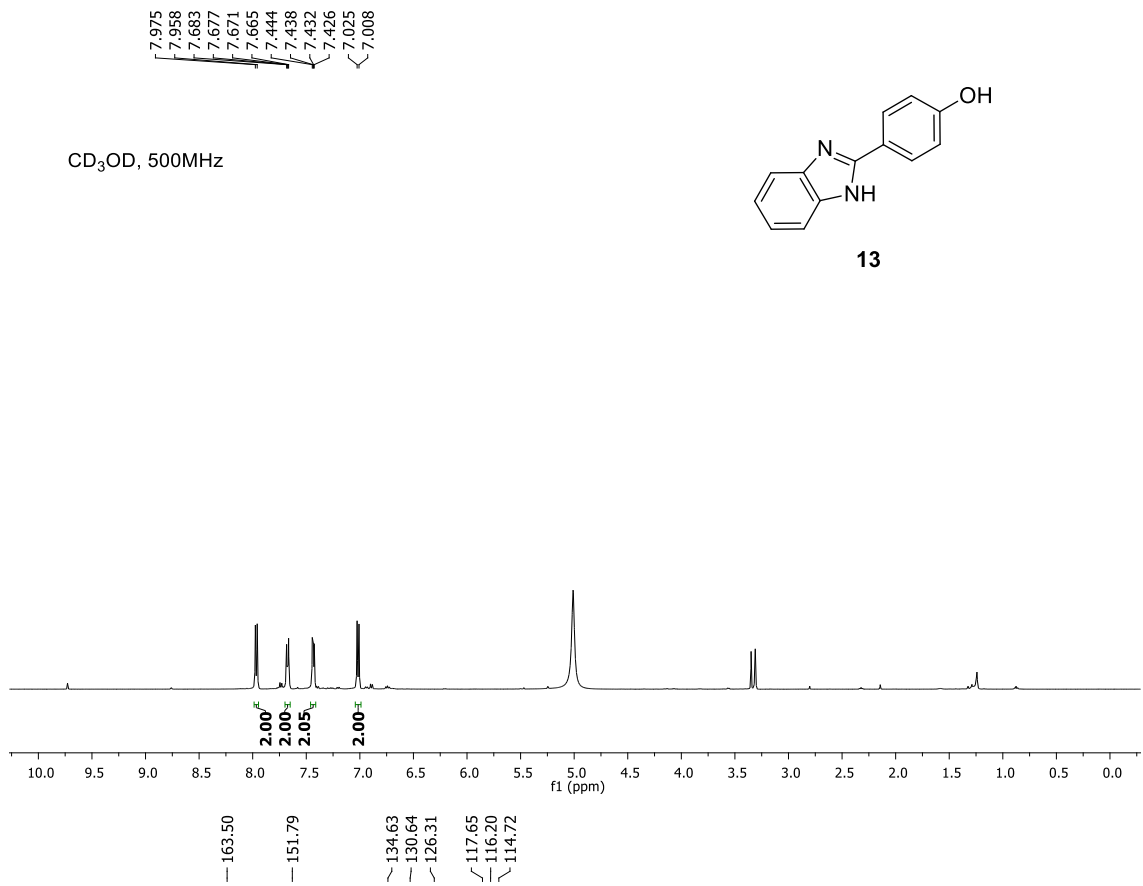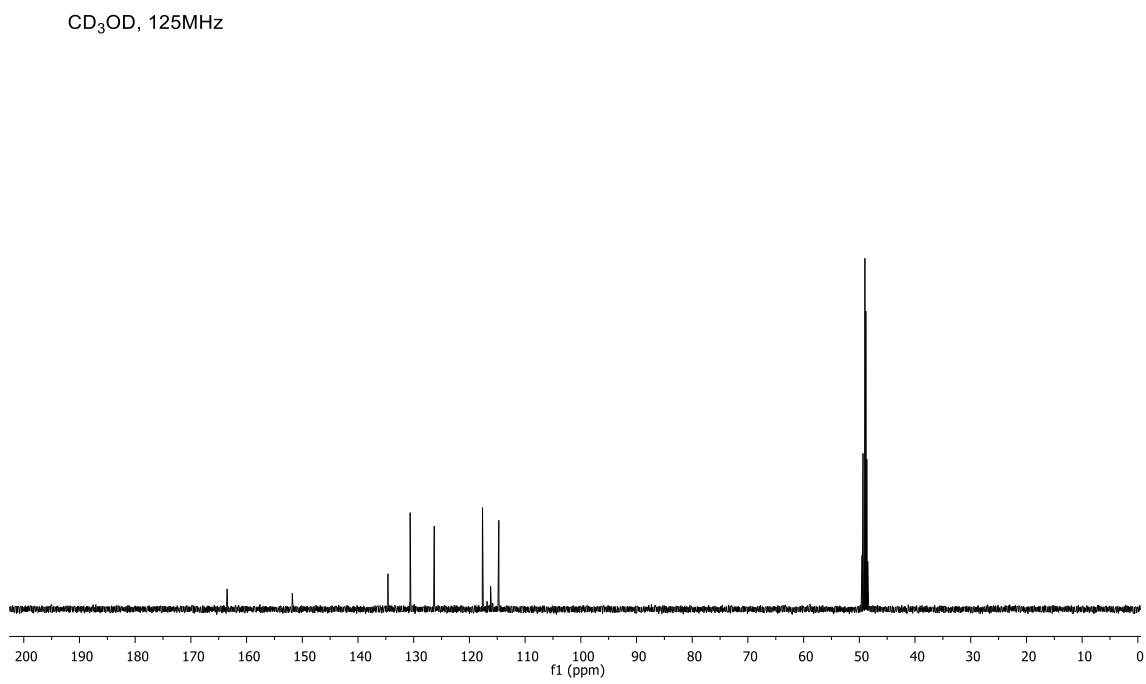

7.656  
7.650  
7.644  
7.638  
7.540  
7.537  
7.487  
7.483  
7.470  
7.467  
7.409  
7.403  
7.397  
7.391  
6.989  
6.973

CD<sub>3</sub>OD, 500MHz

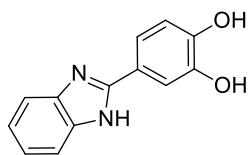

14

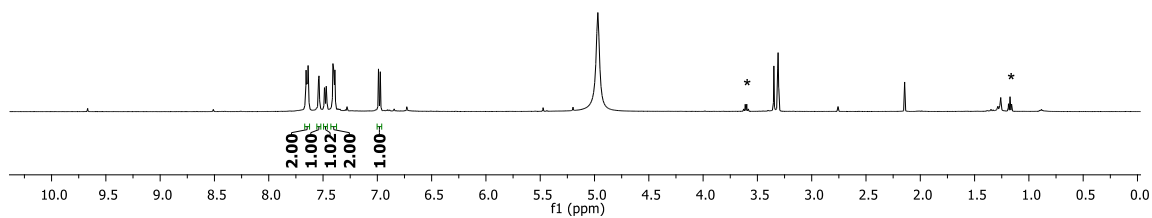

152.38  
151.38  
147.61  
135.59  
125.80  
121.17  
117.62  
117.08  
115.31  
114.80

CD<sub>3</sub>OD, 125MHz

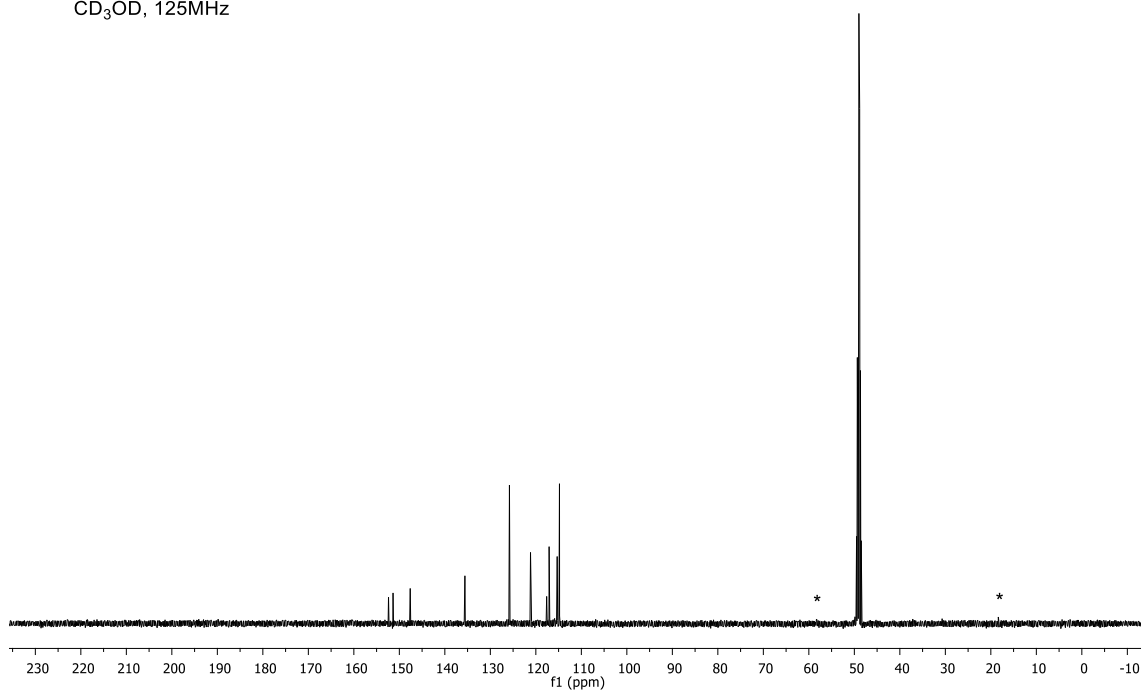

\* = ethanol

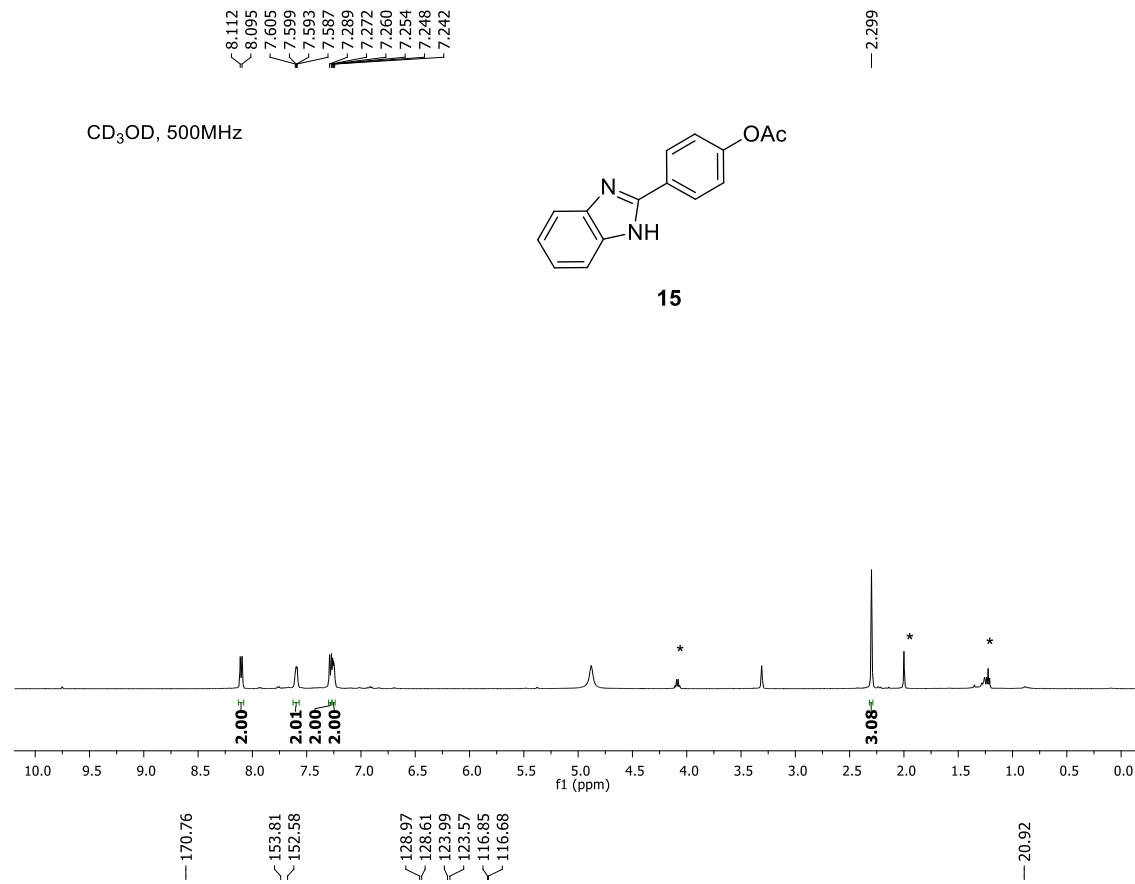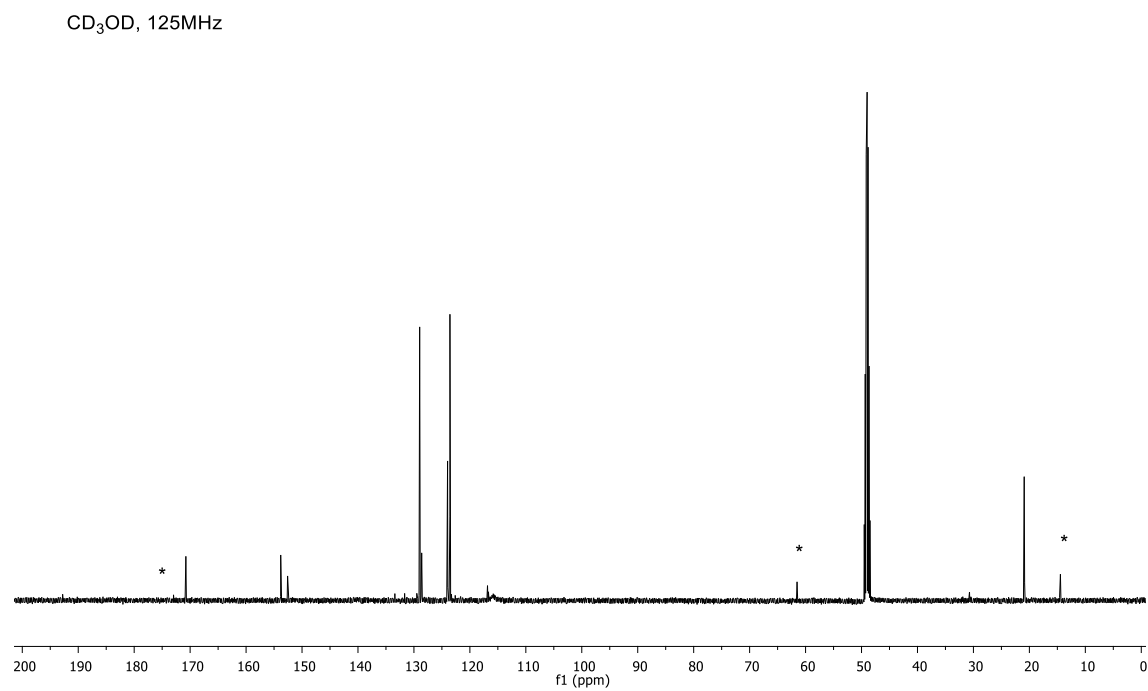

\* = ethyl acetate

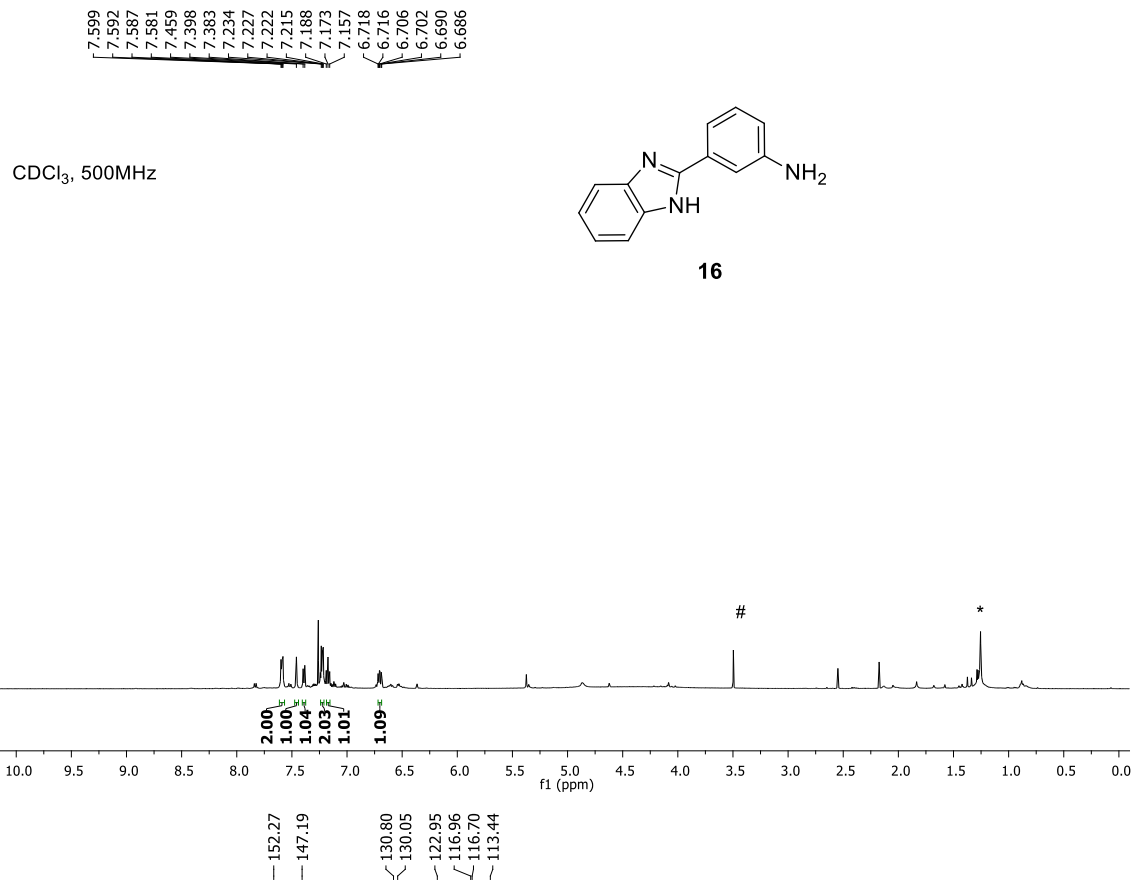

CDCl<sub>3</sub>, 125MHz

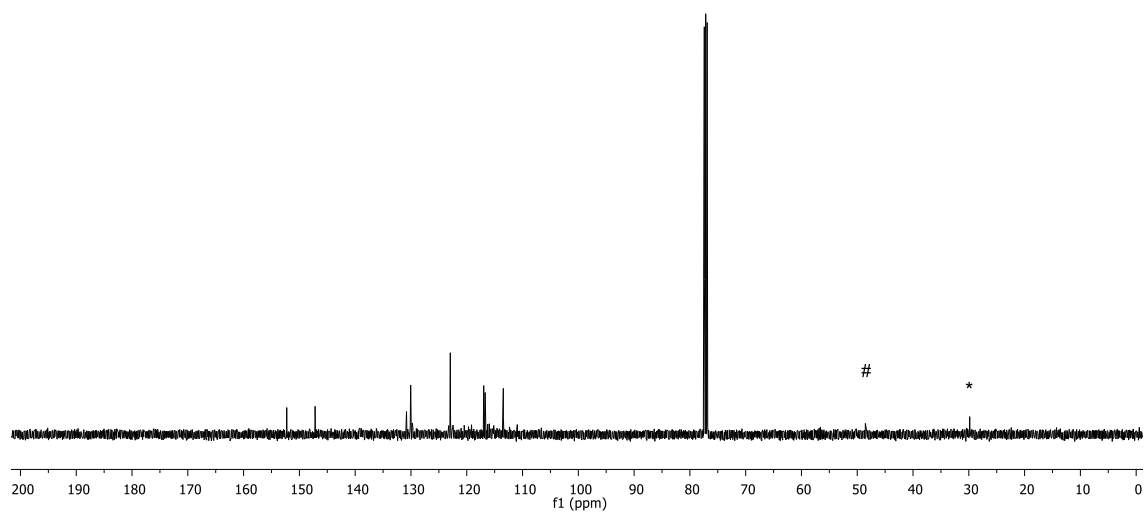

\* = grease, # = methanol

CD<sub>3</sub>OD, 500MHz

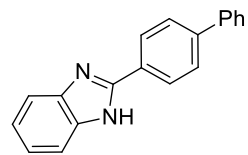

17

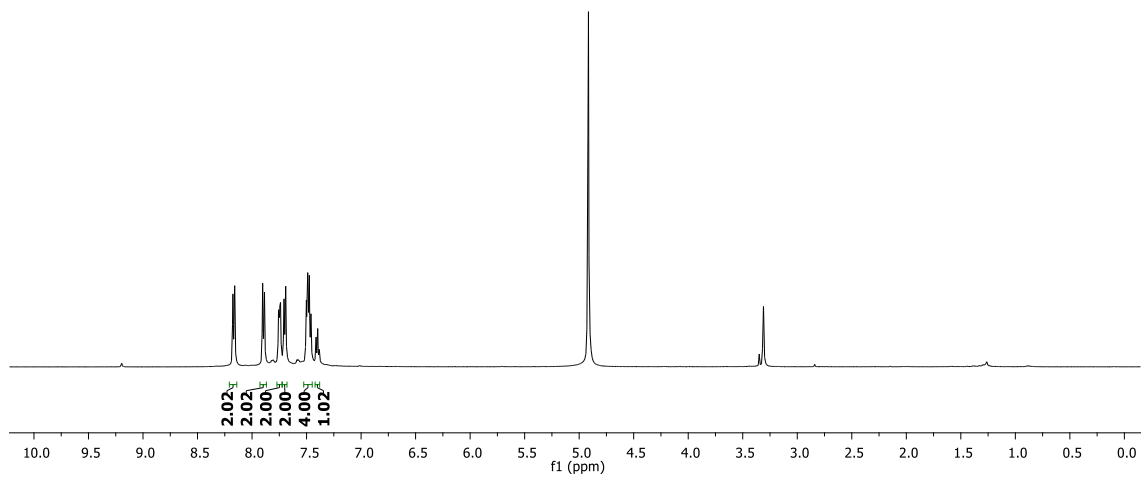

CD<sub>3</sub>OD, 125MHz

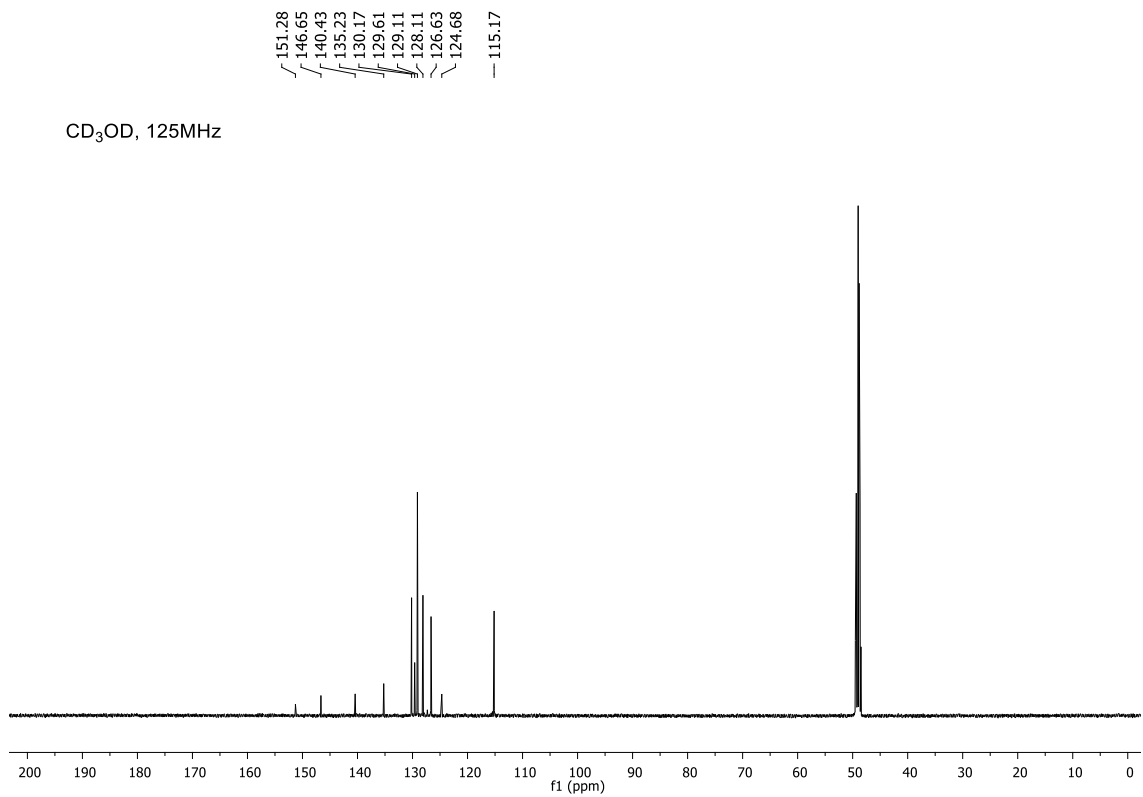

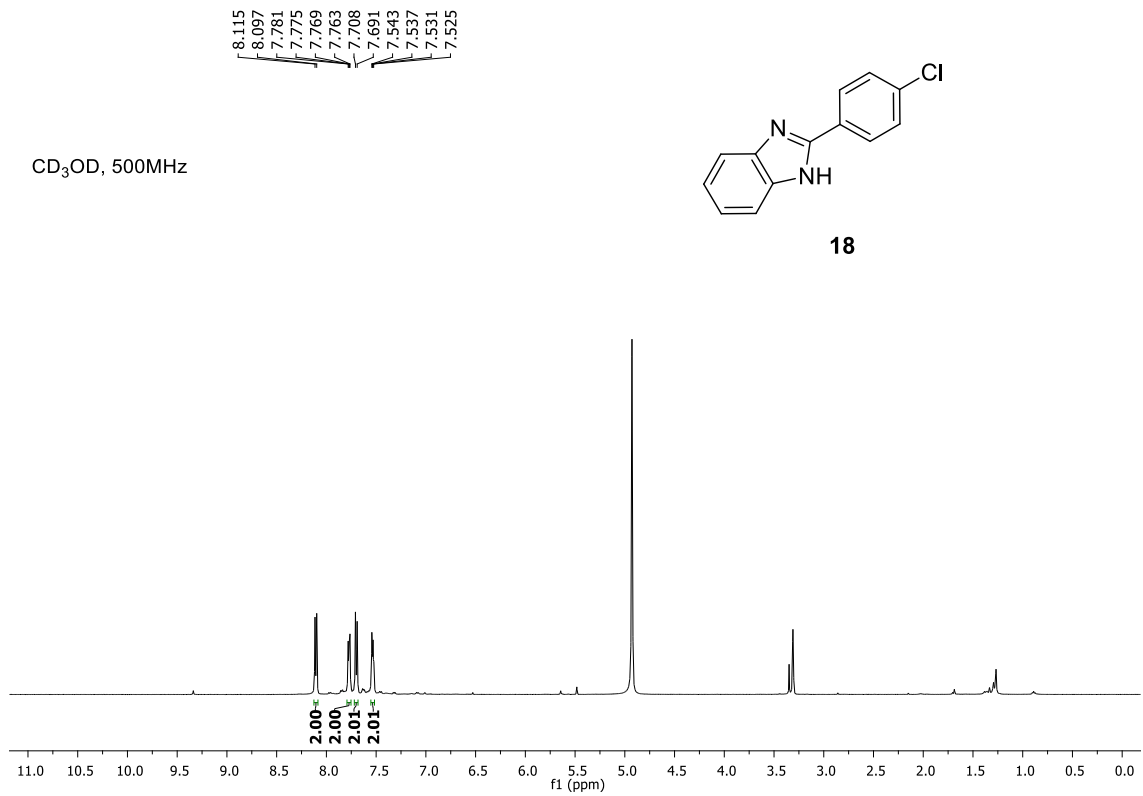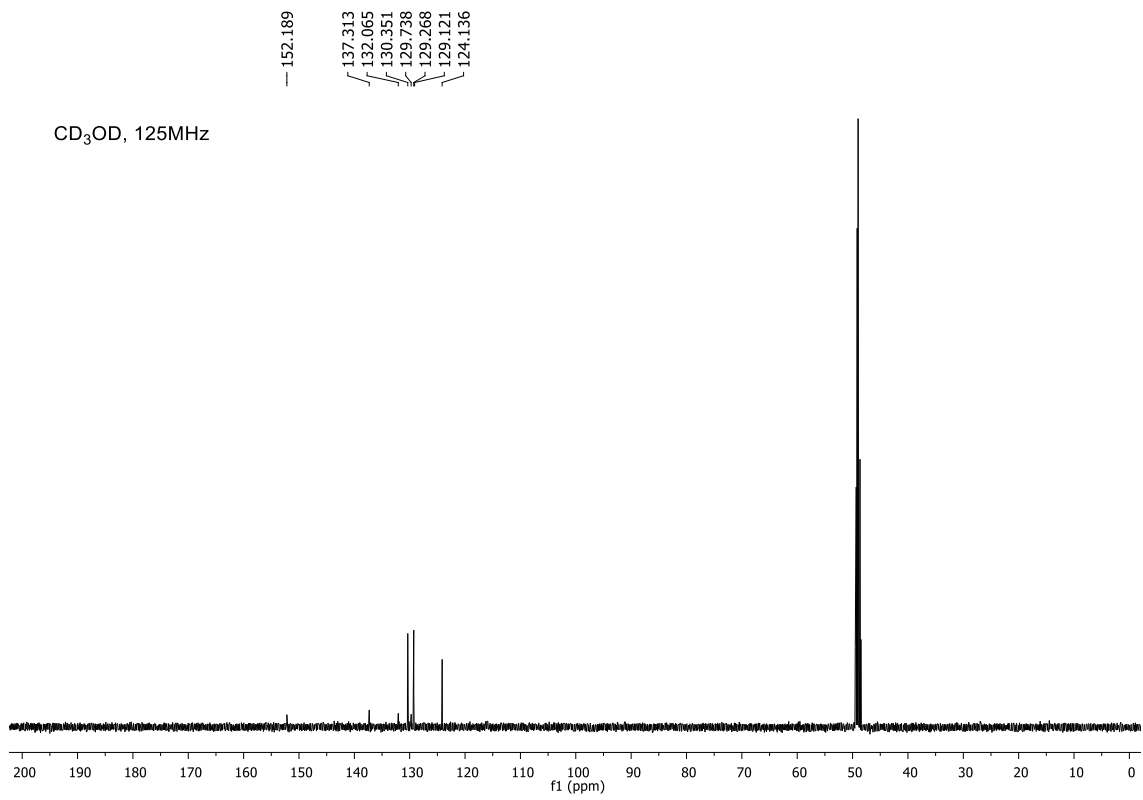

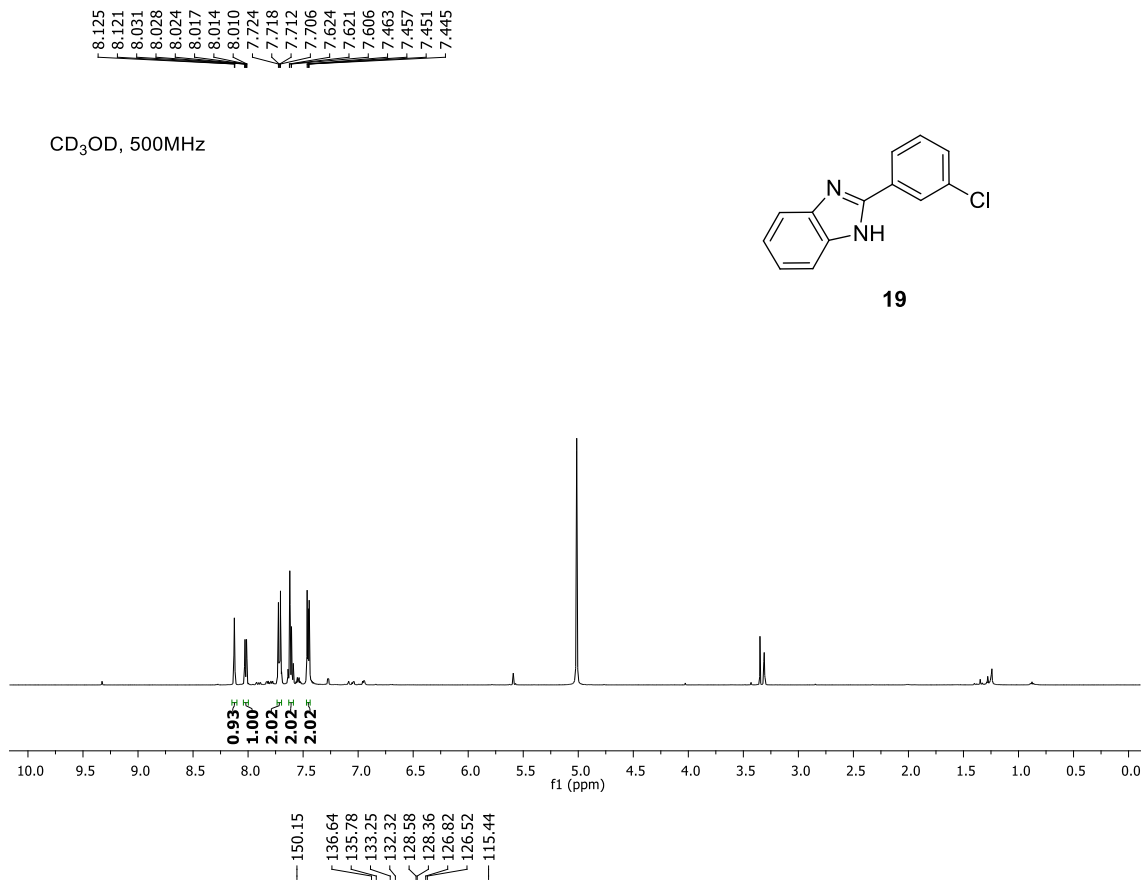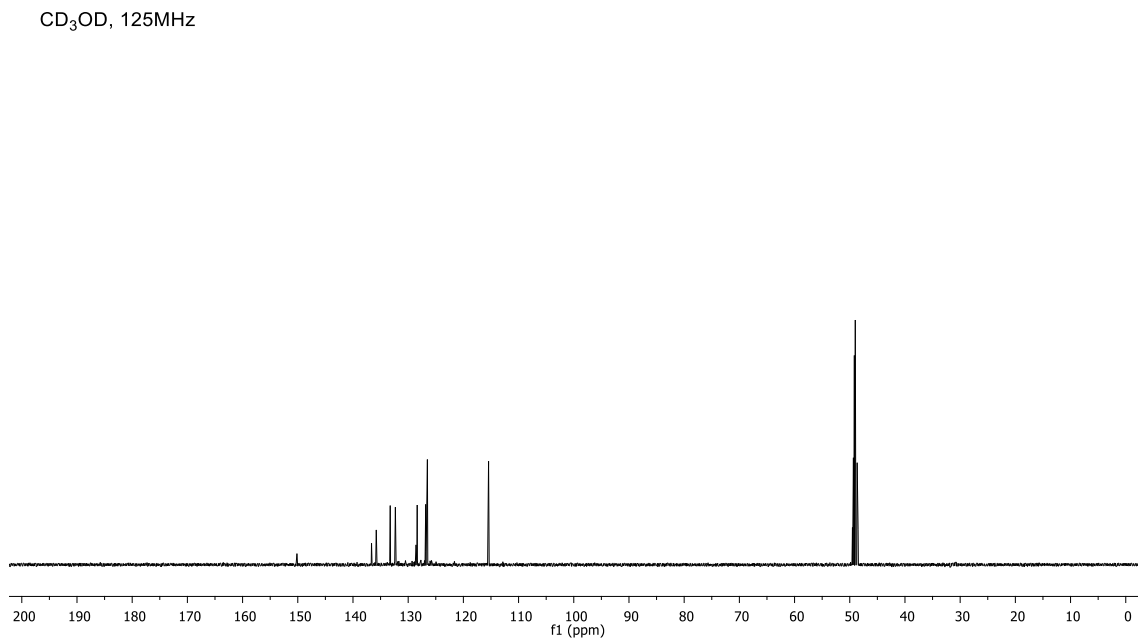



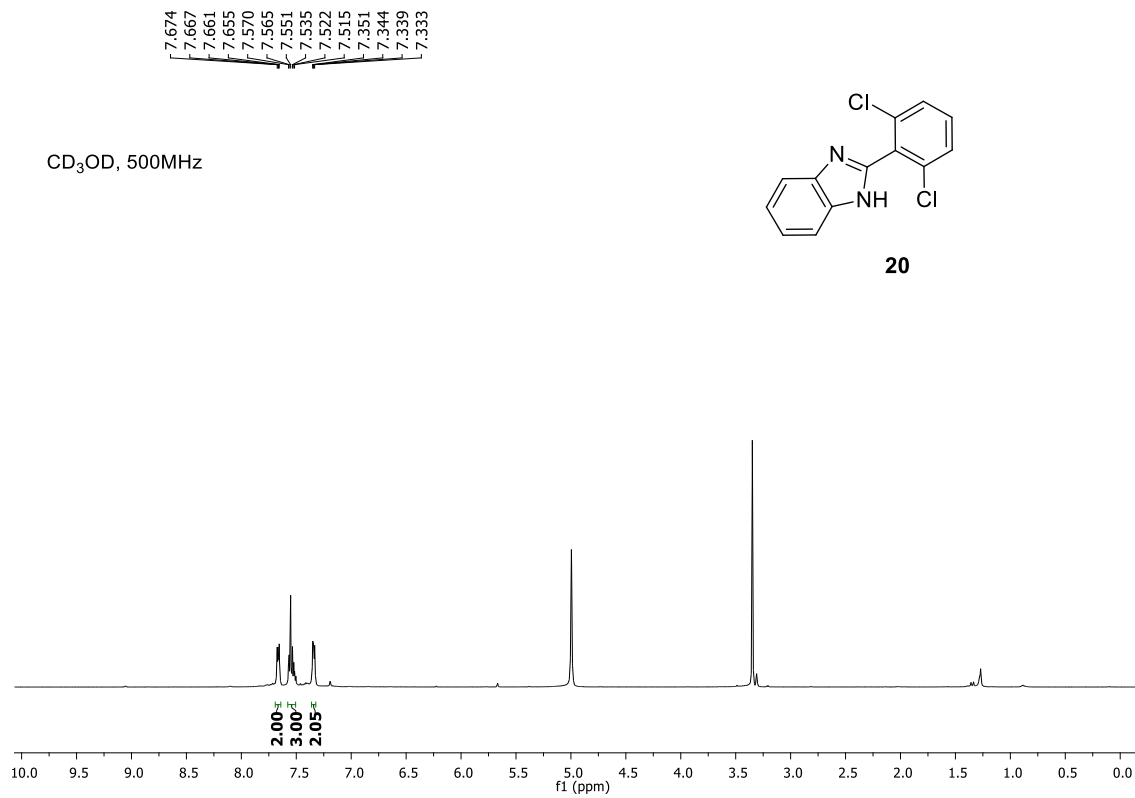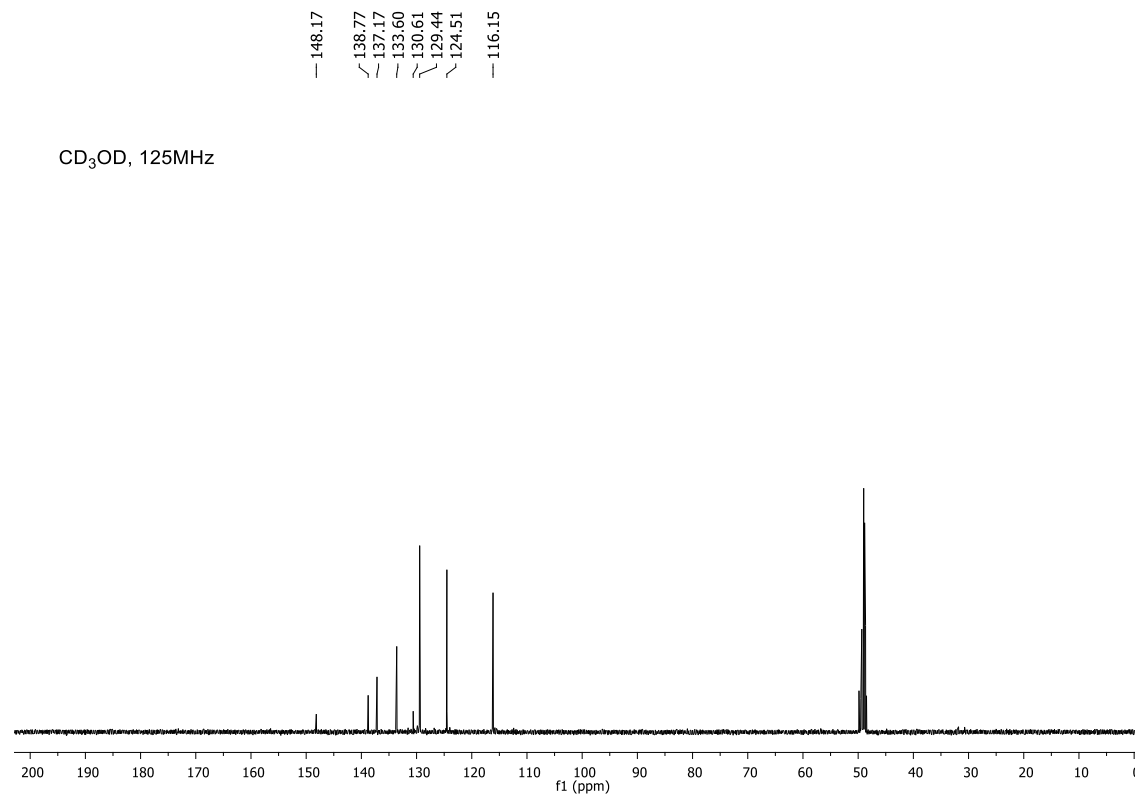

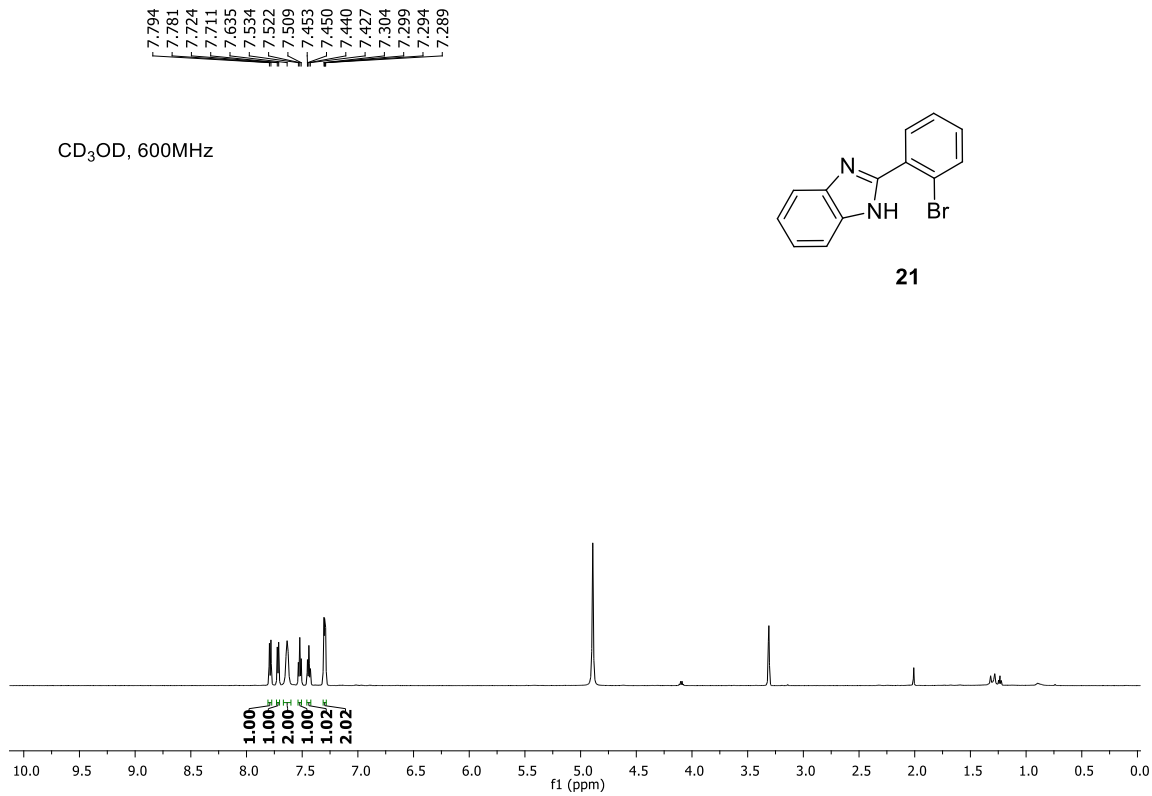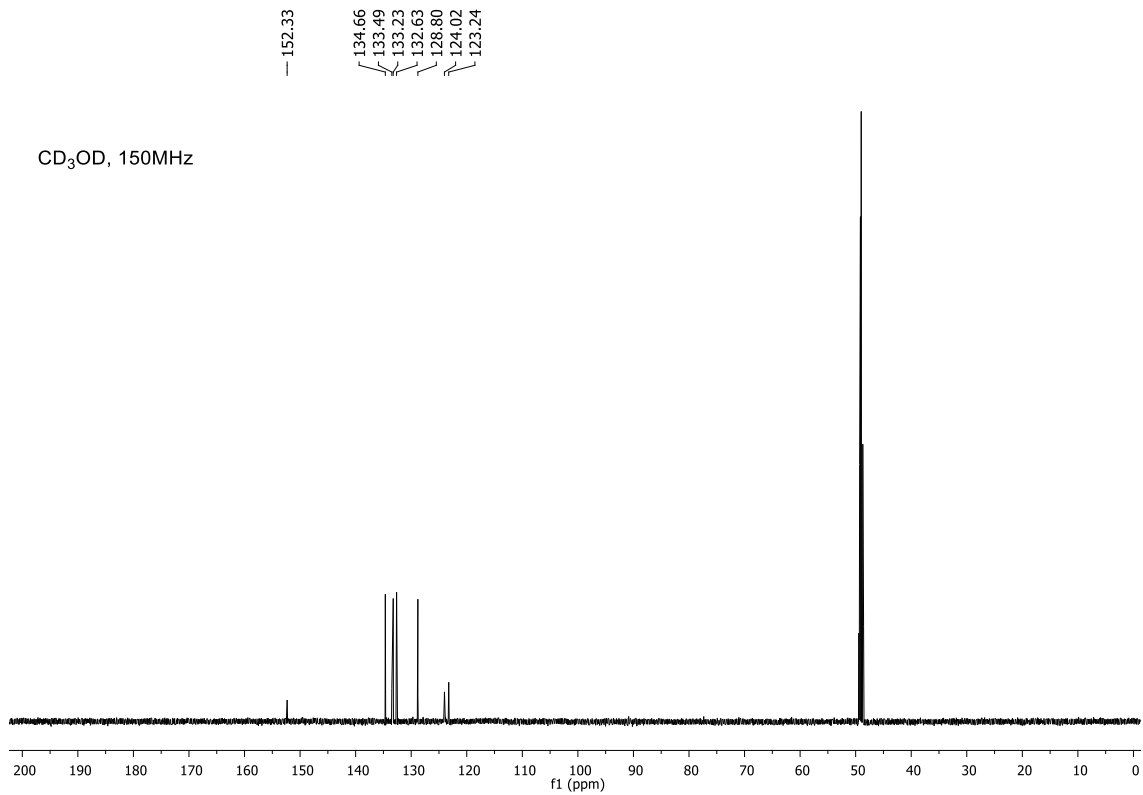

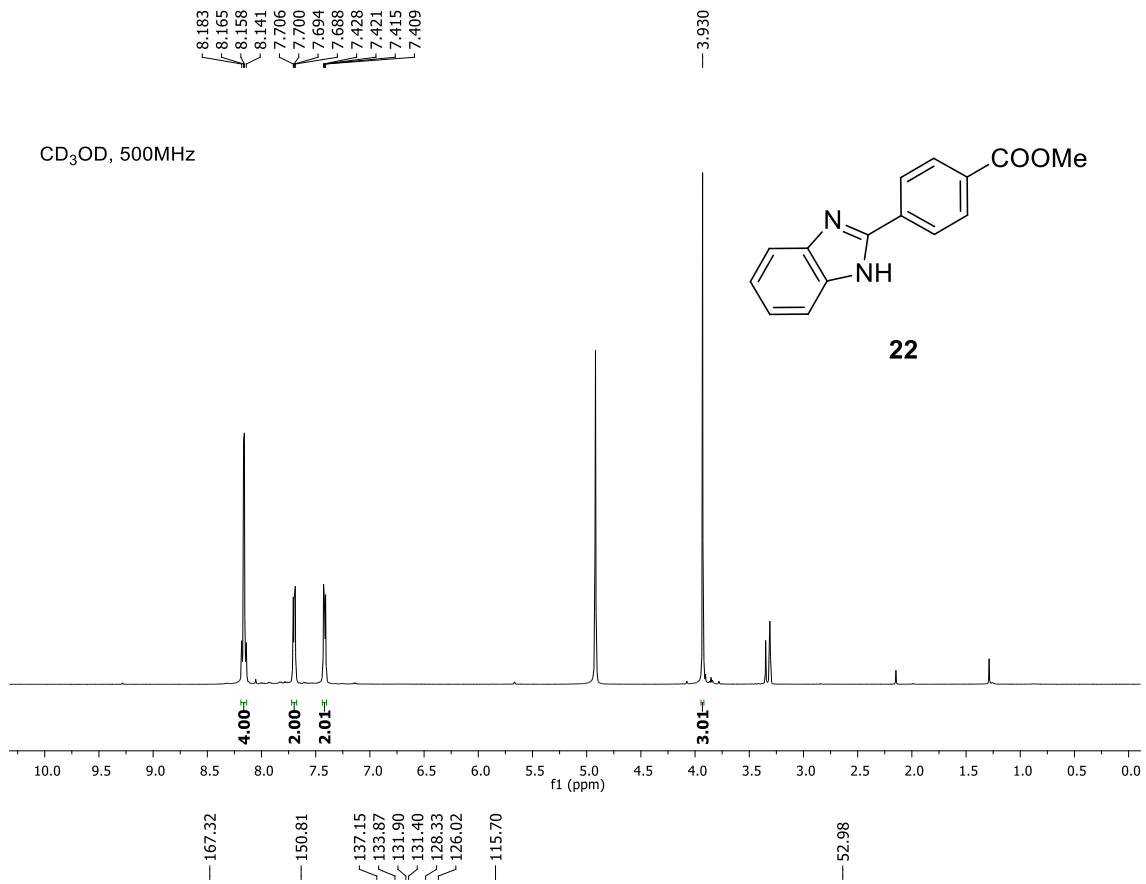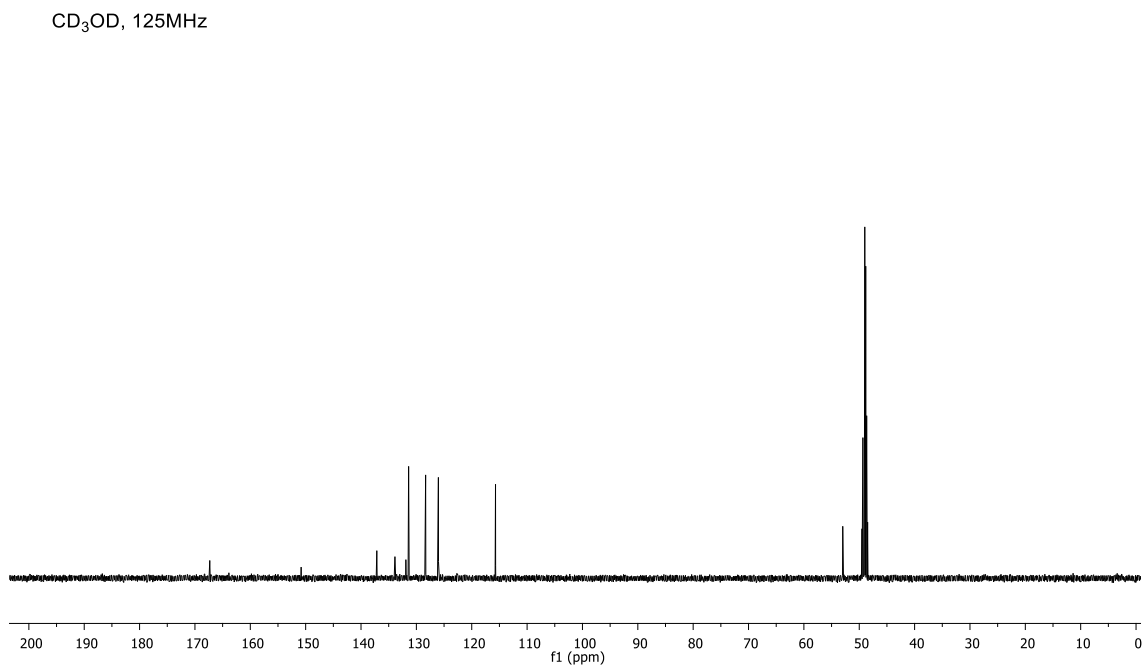

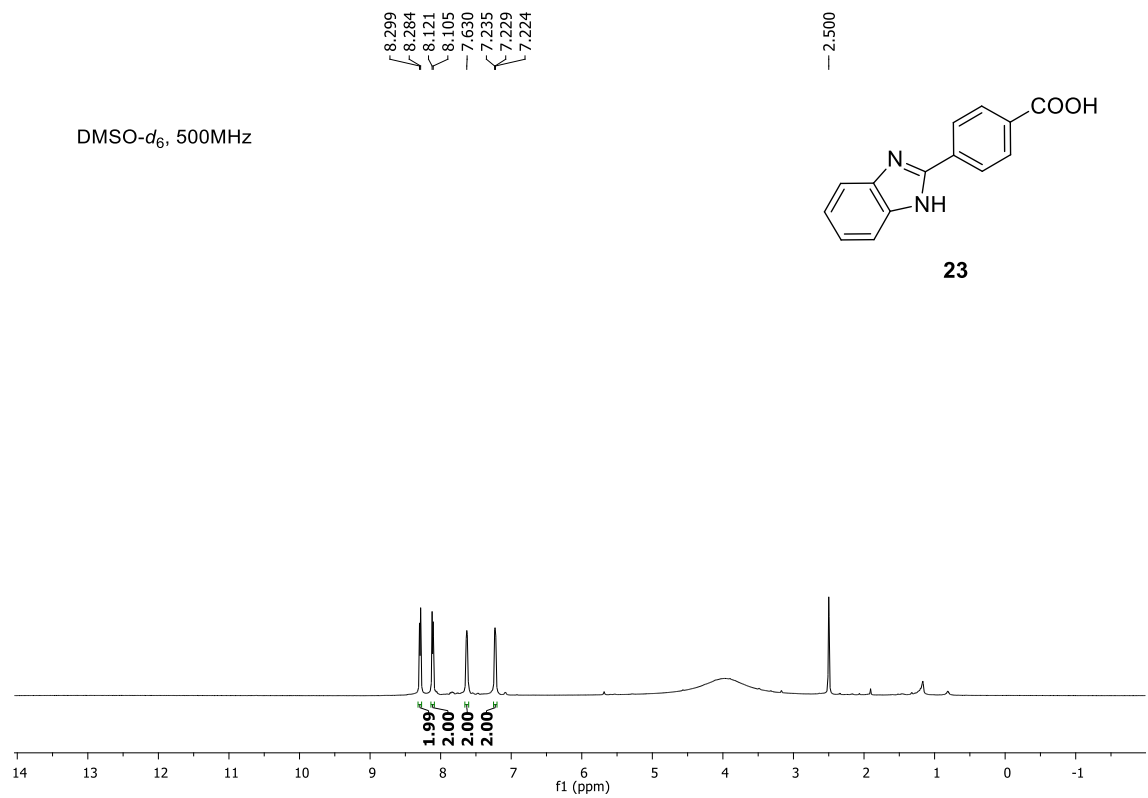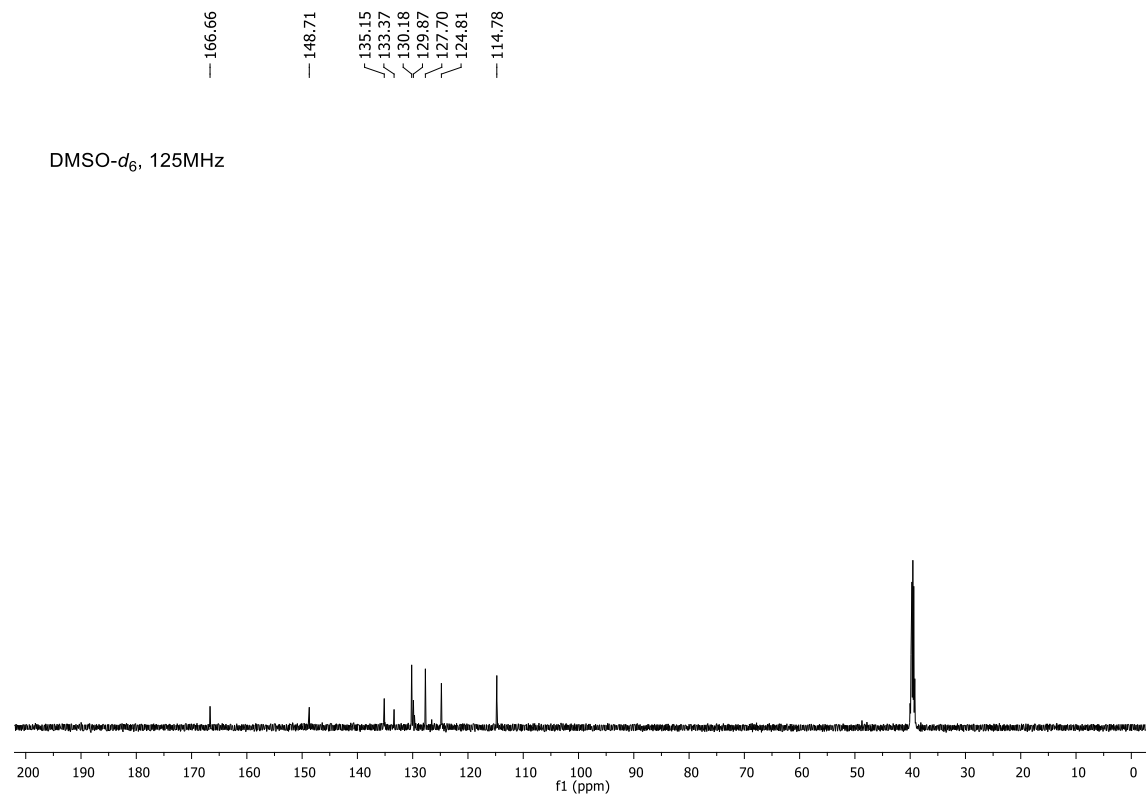

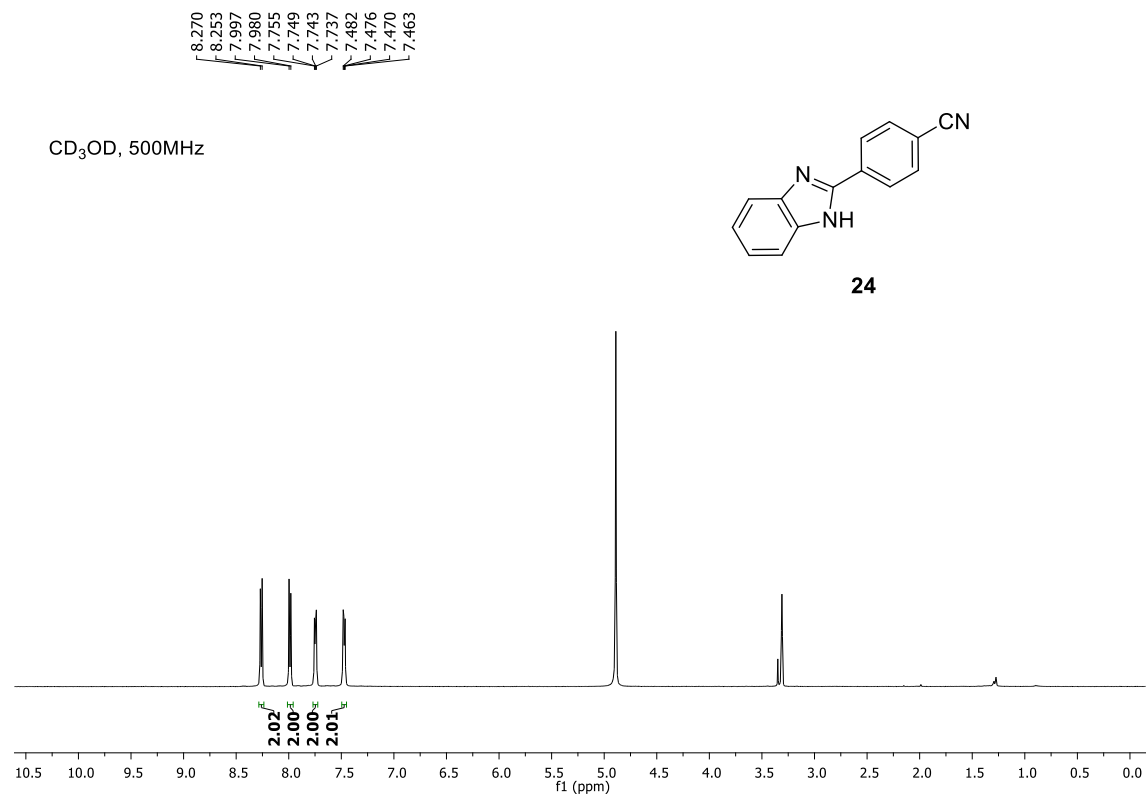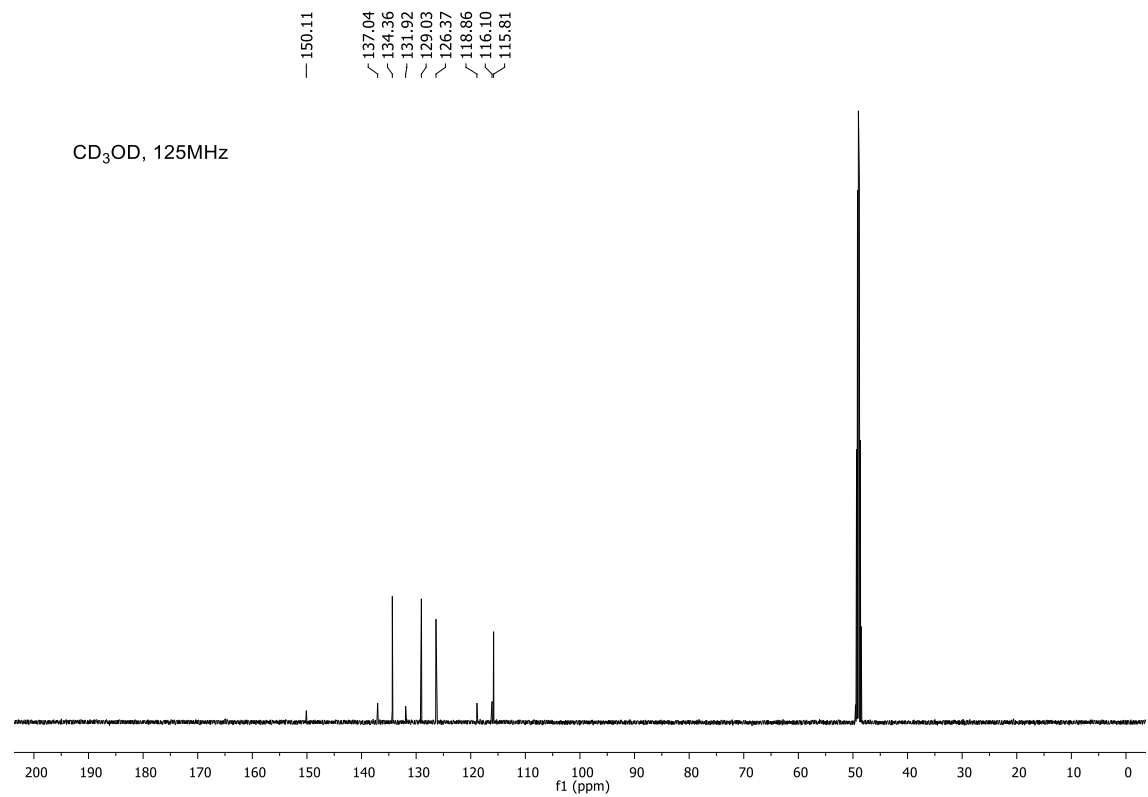

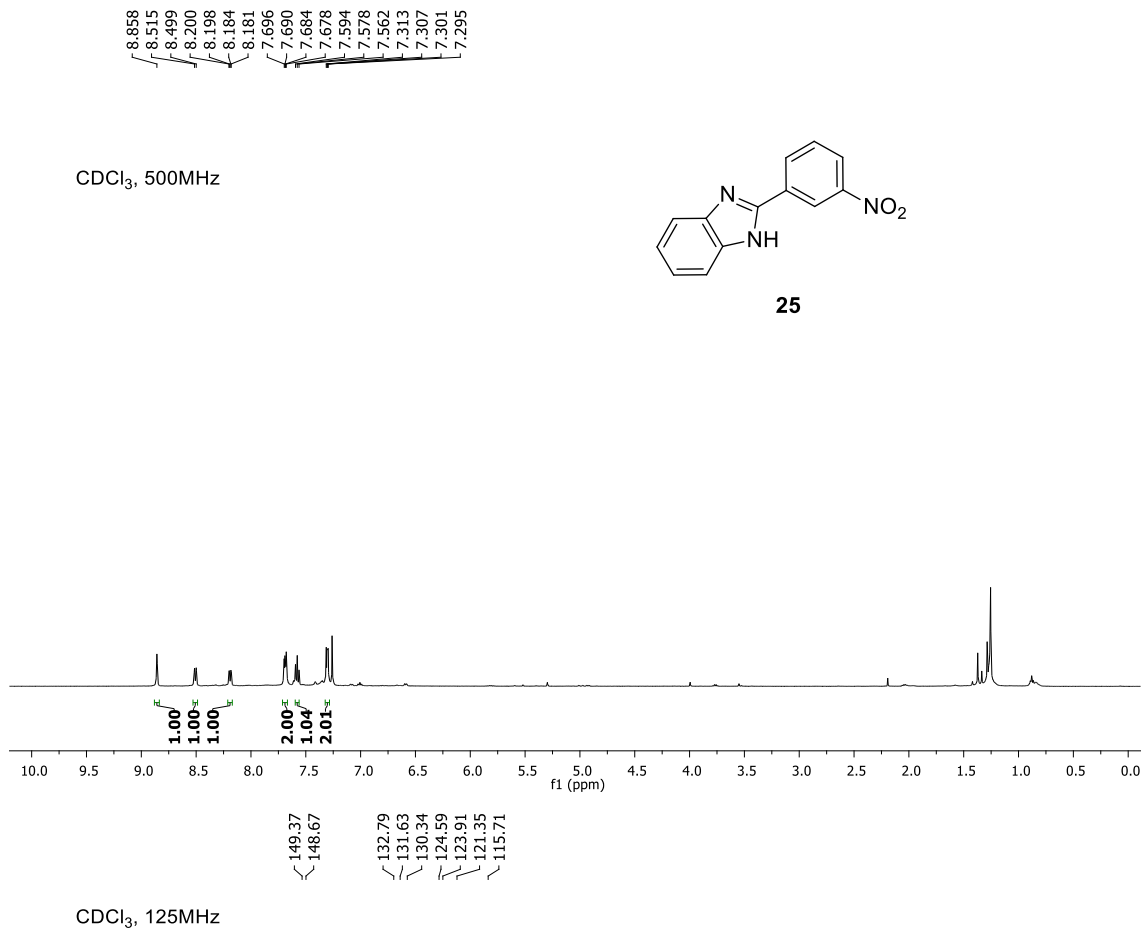

# = grease, \* = hexane

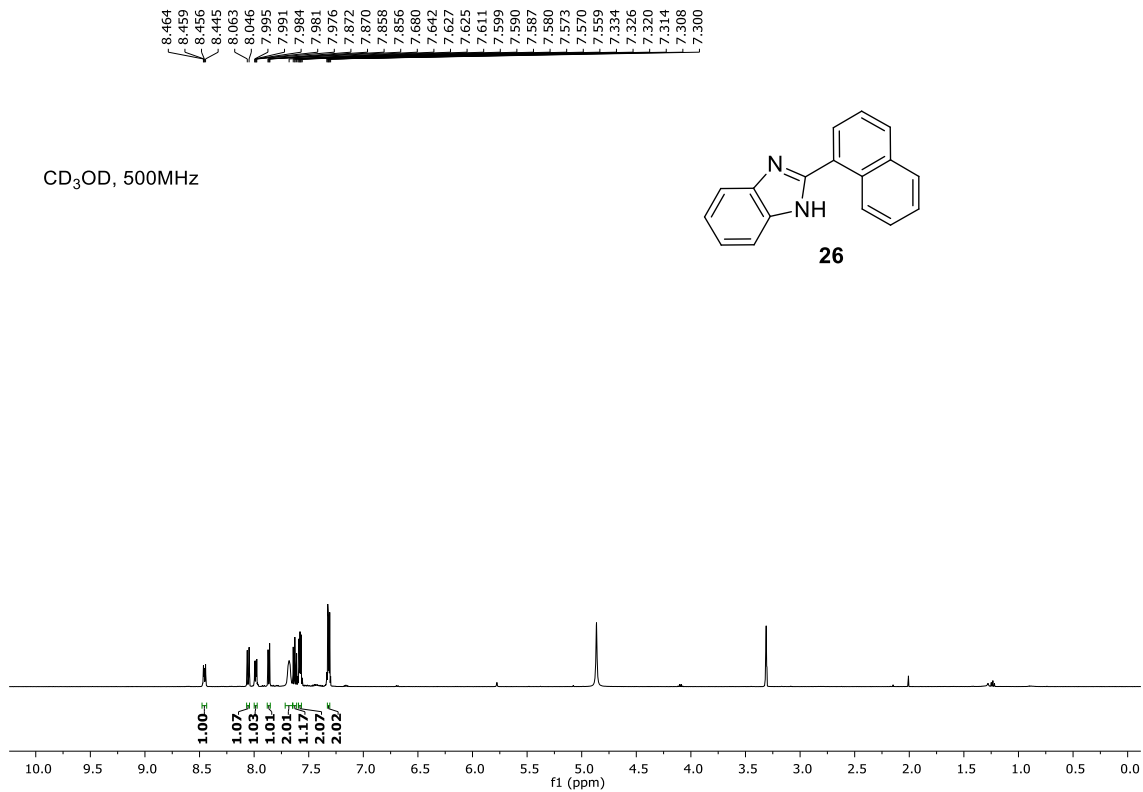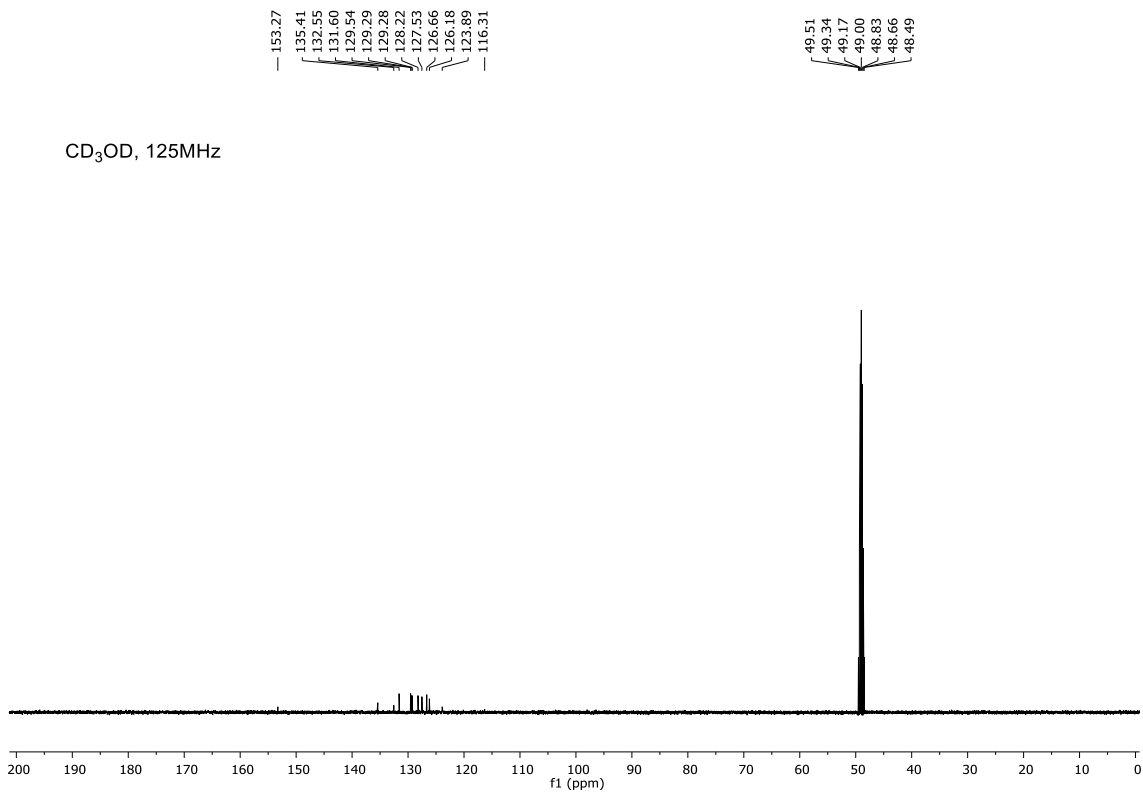

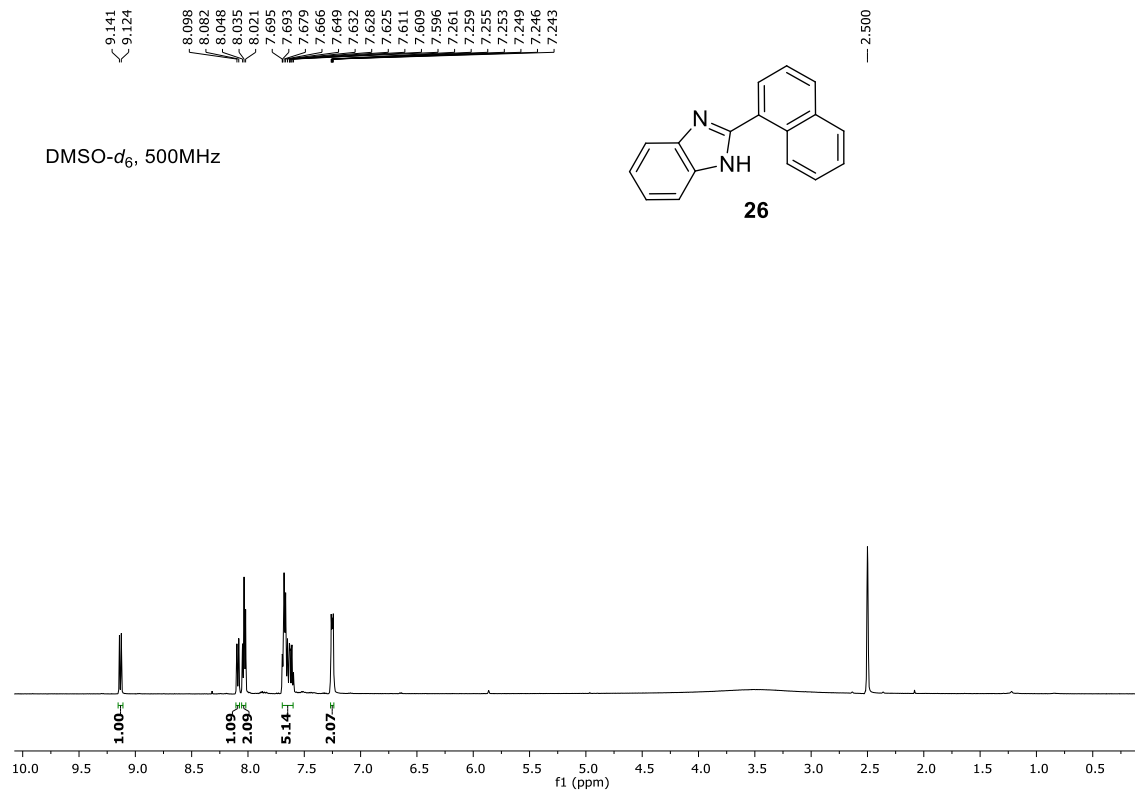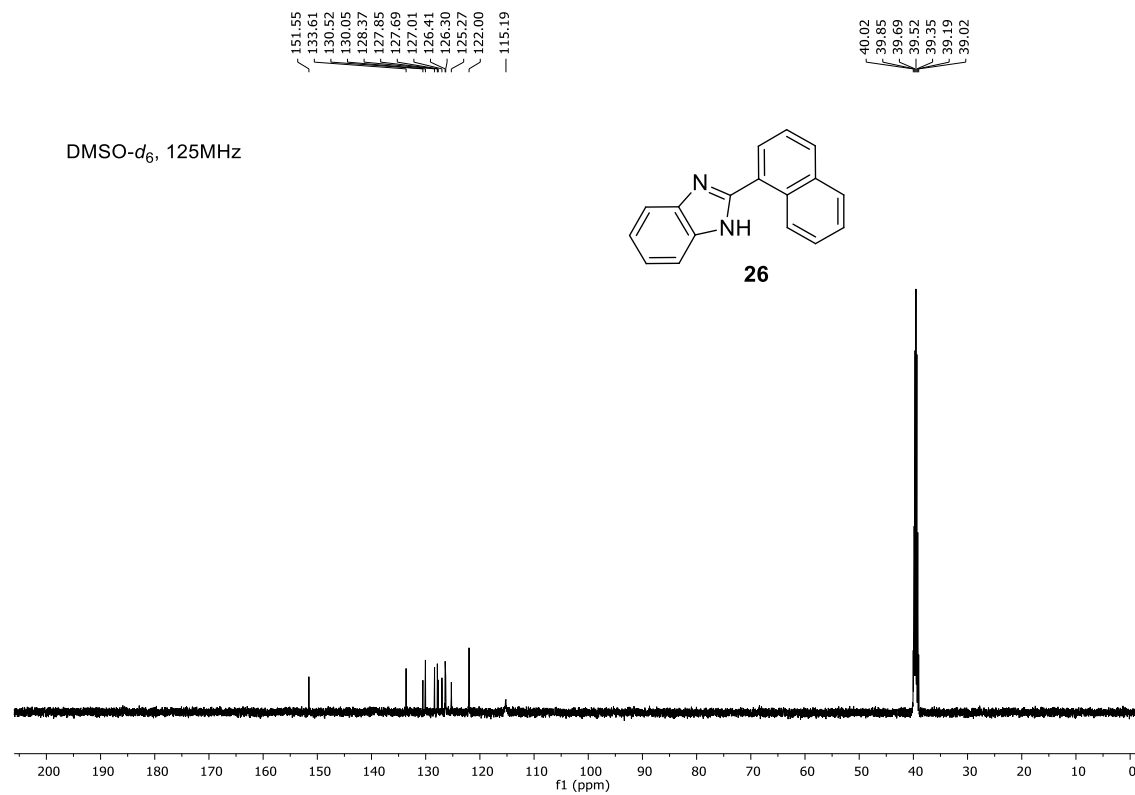



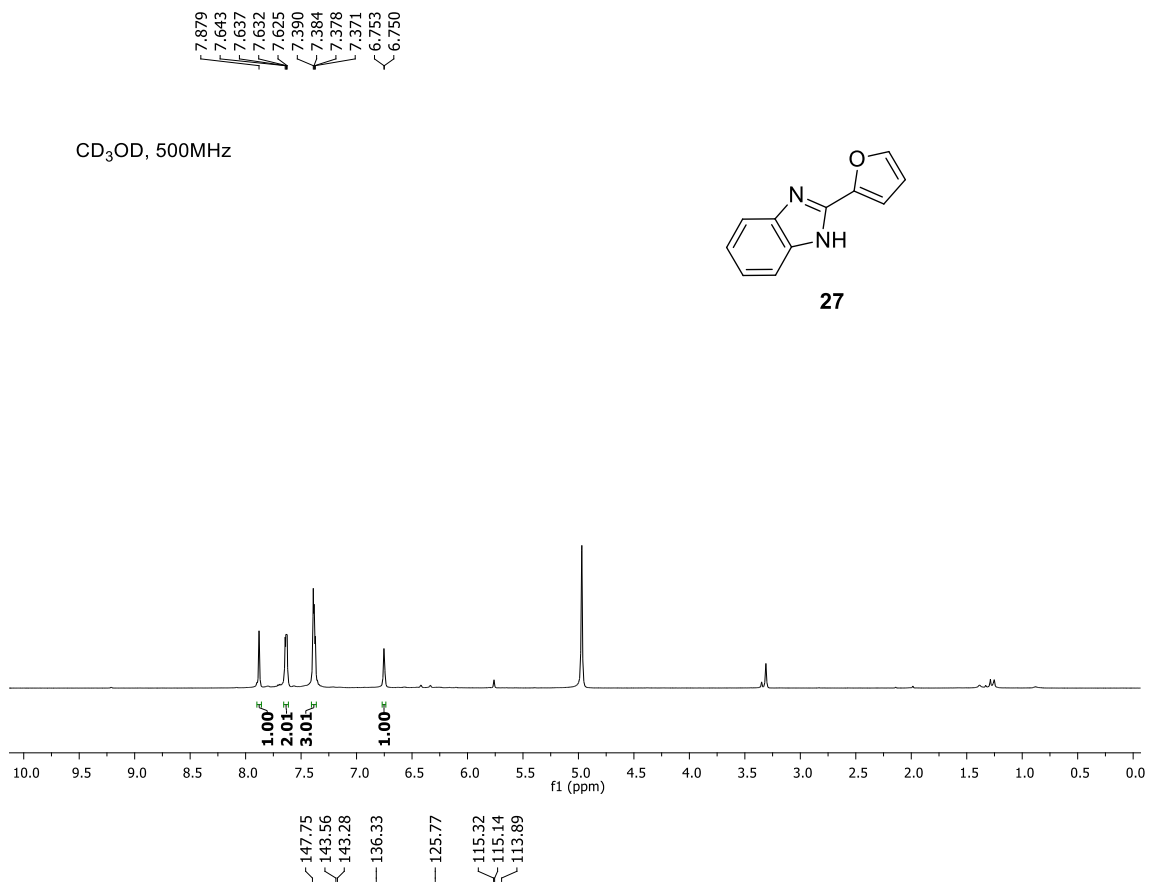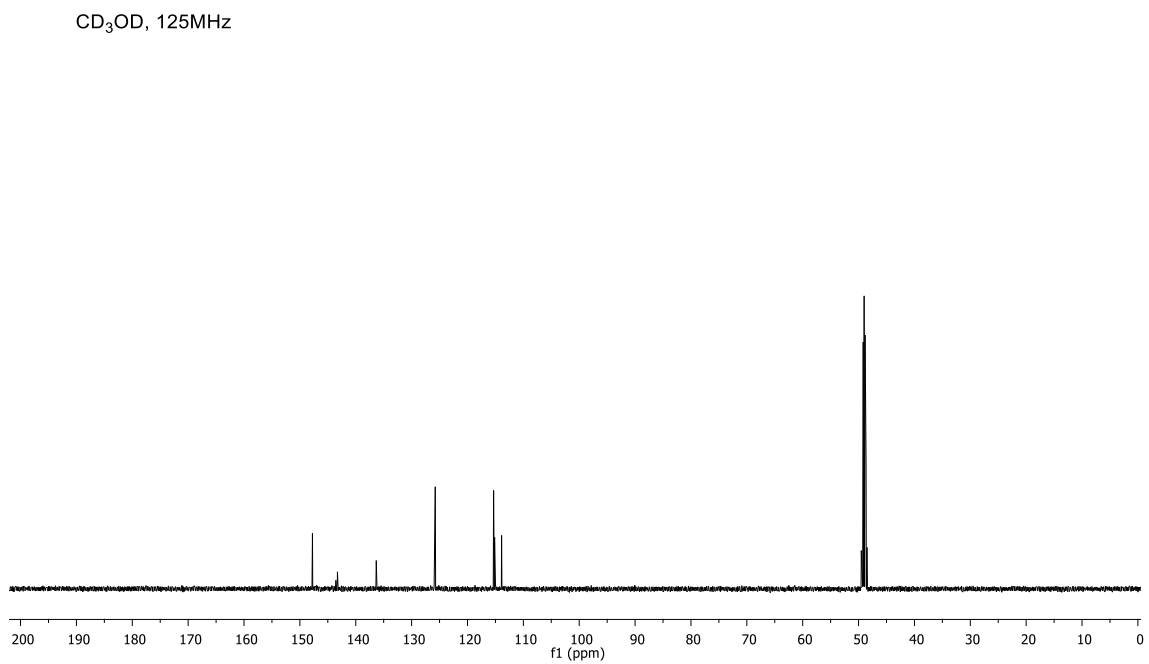

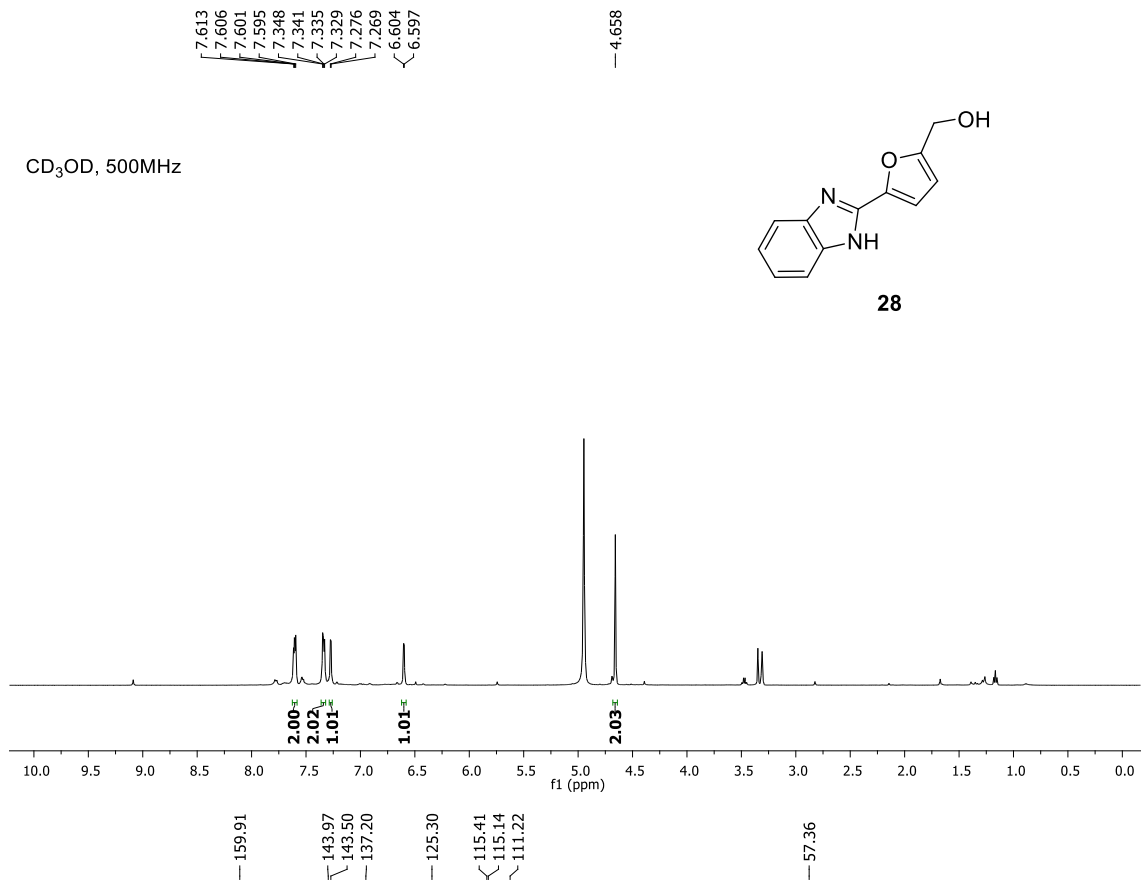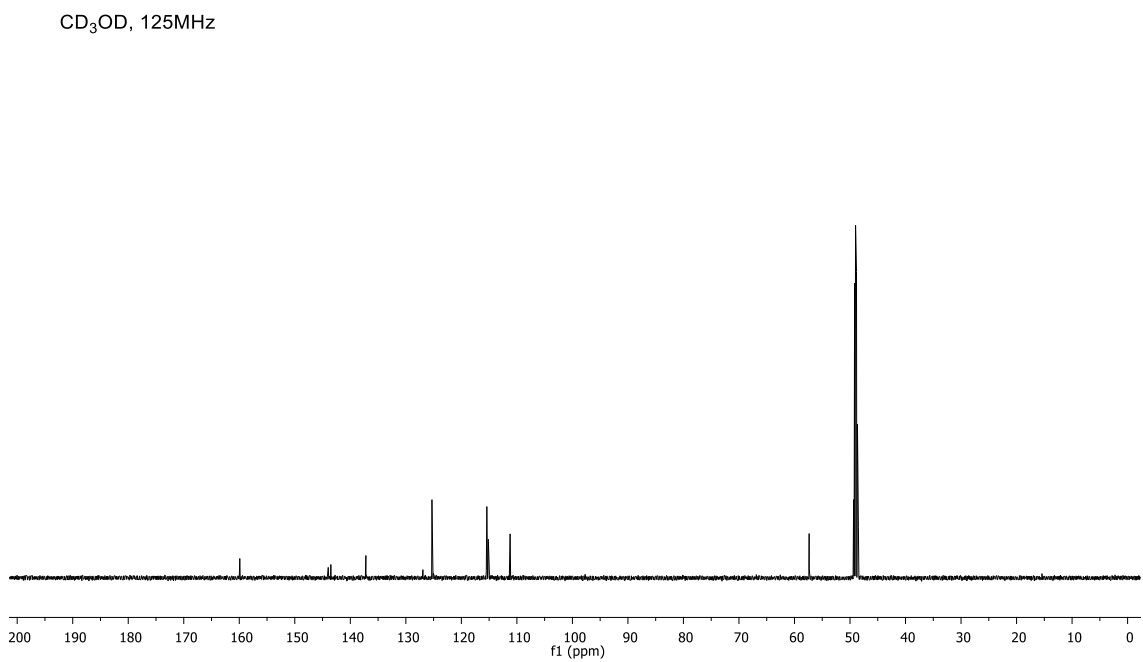

CD<sub>3</sub>OD, 600MHz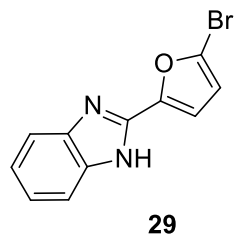

7.568  
7.563  
7.560  
7.555  
7.261  
7.256  
7.251  
7.246  
7.158  
7.152  
6.659  
6.653

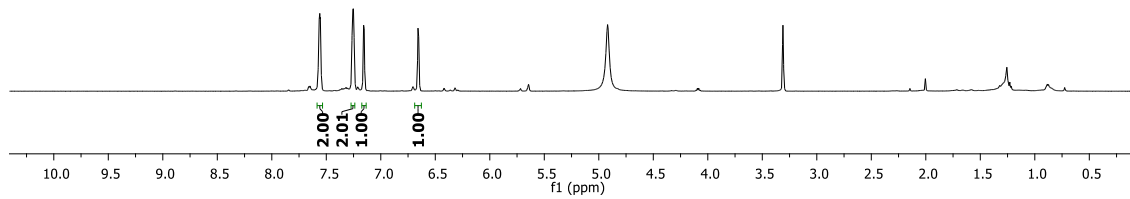

148.39  
144.14  
125.54  
124.28  
115.96  
115.33  
114.14

CD<sub>3</sub>OD, 150MHz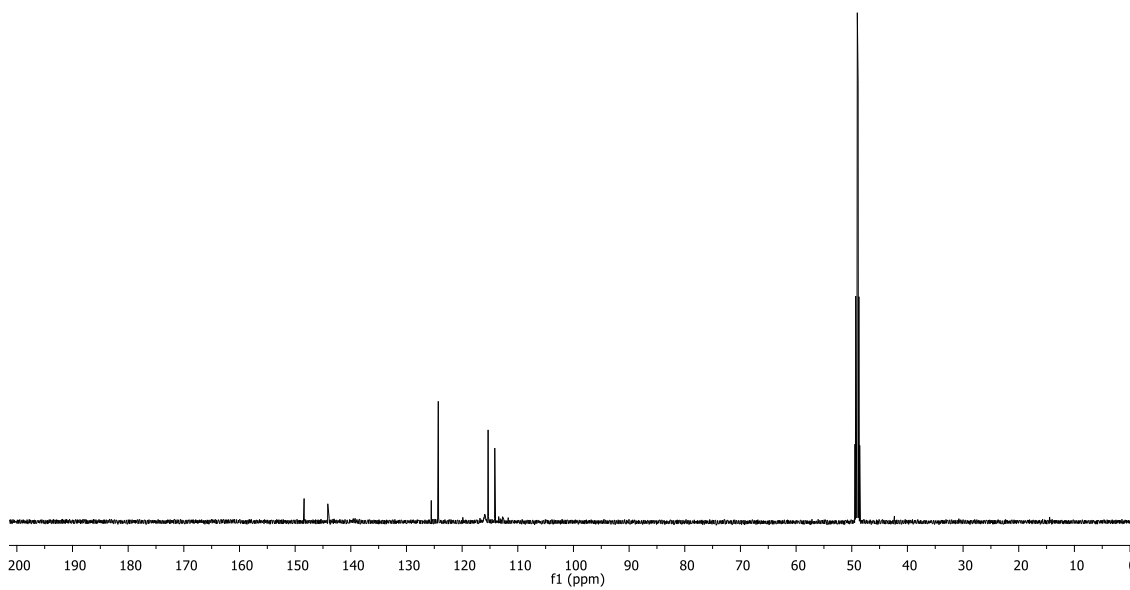

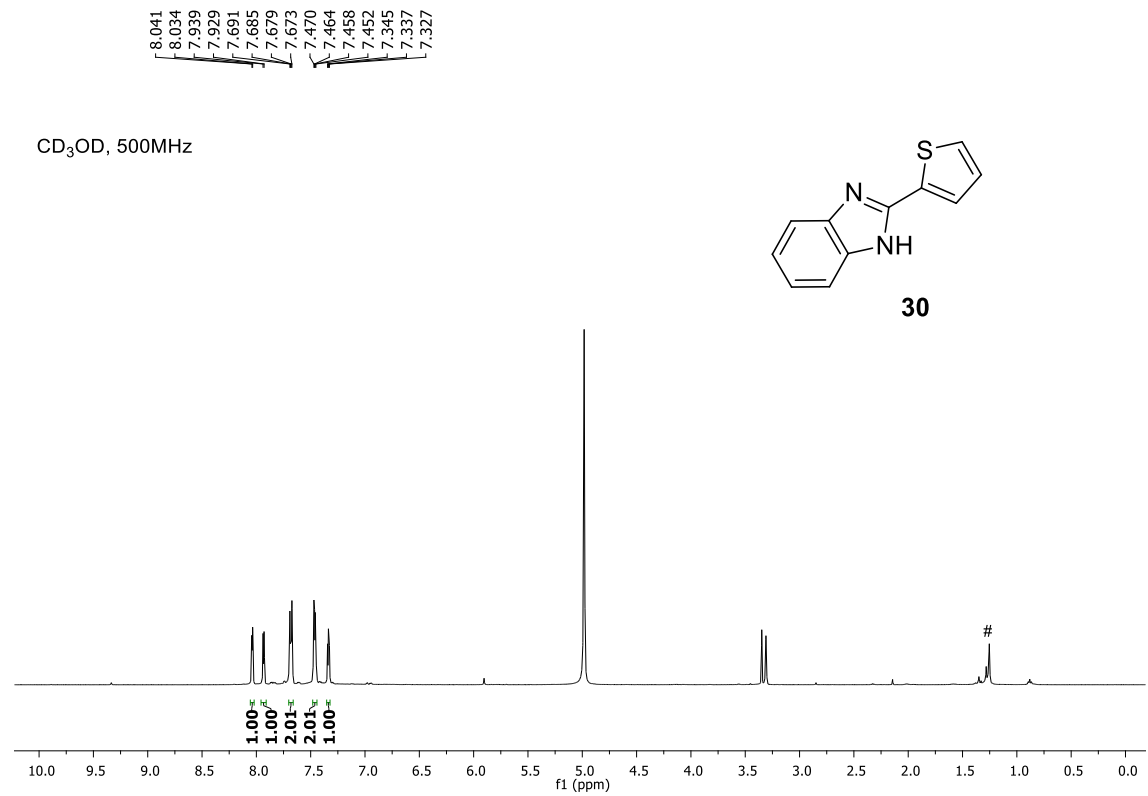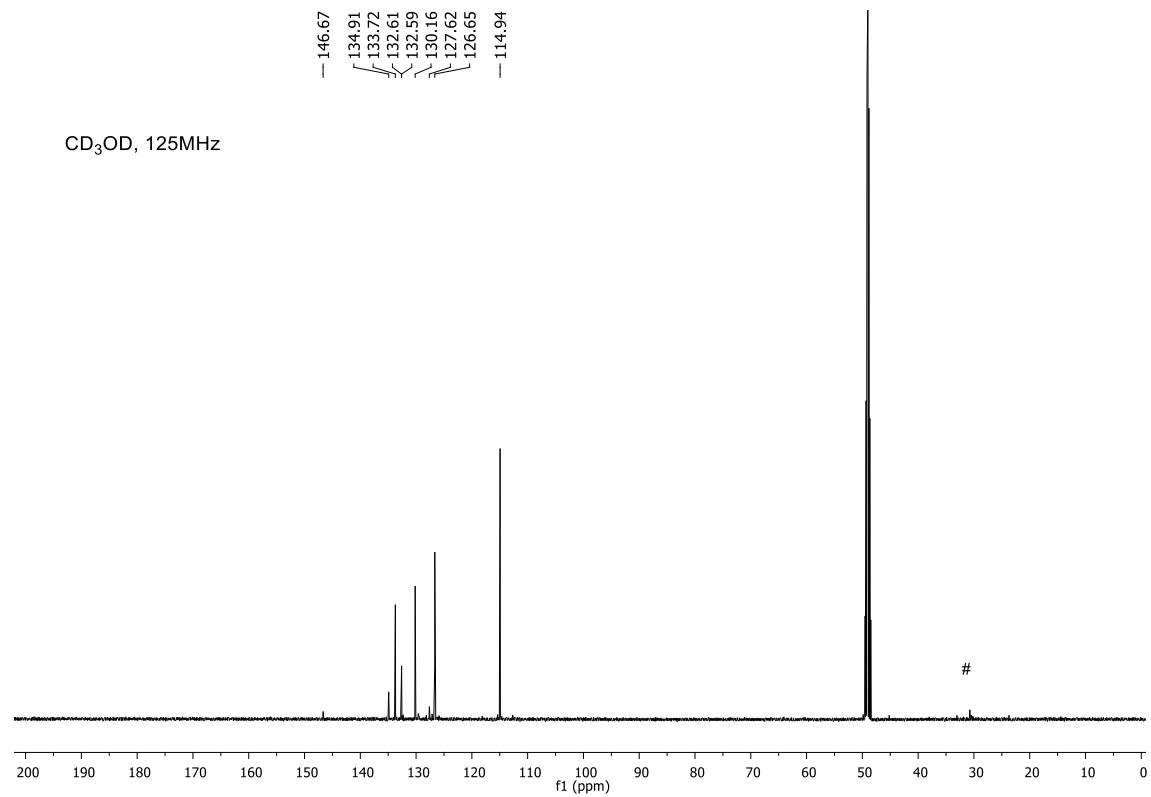

# = grease

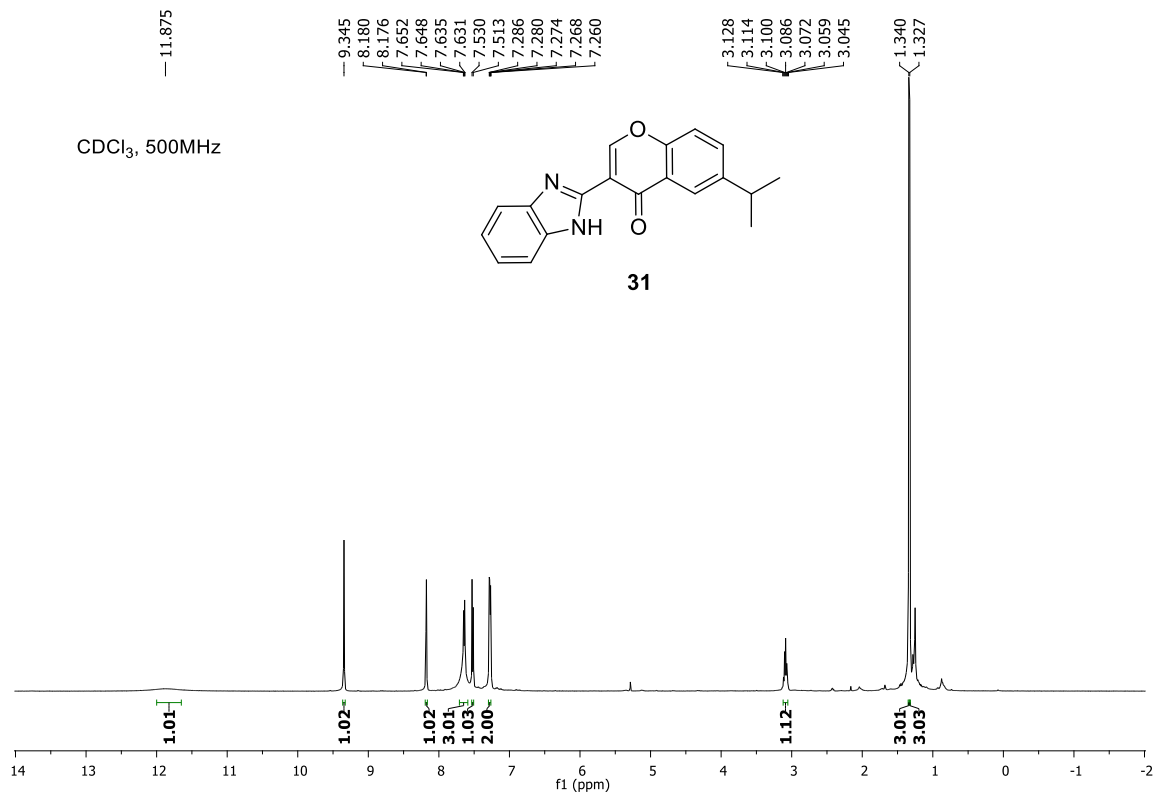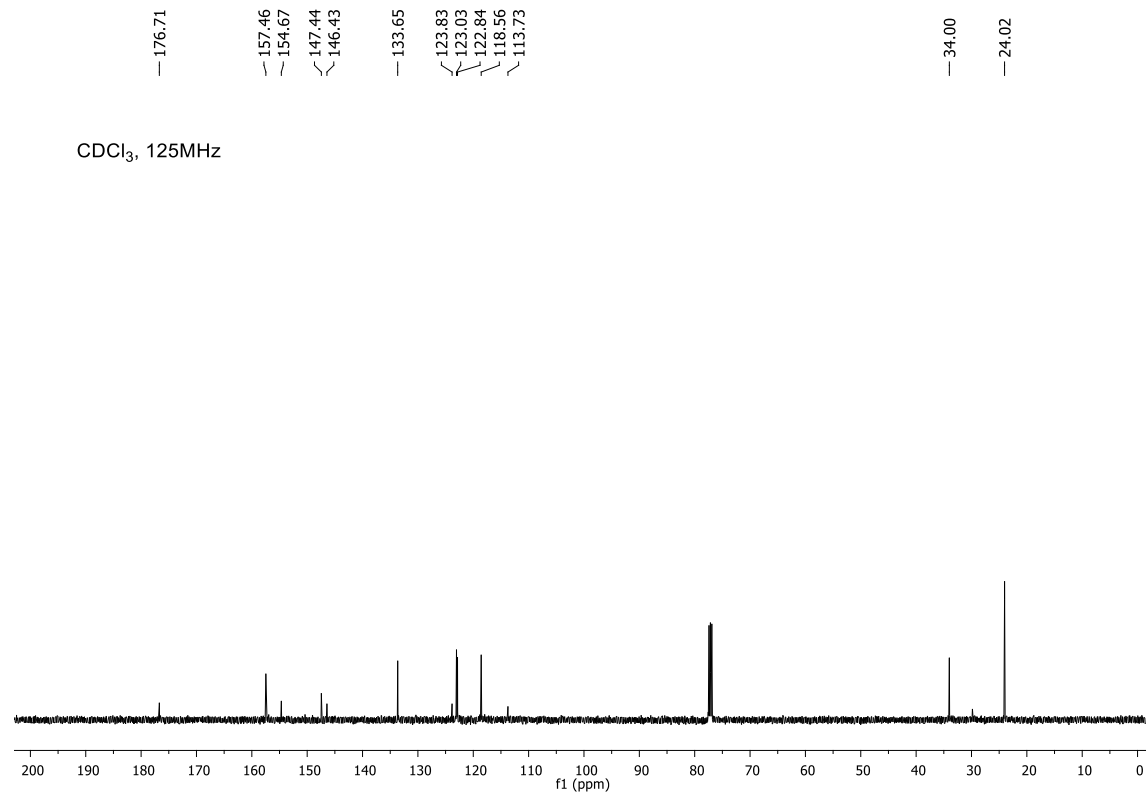

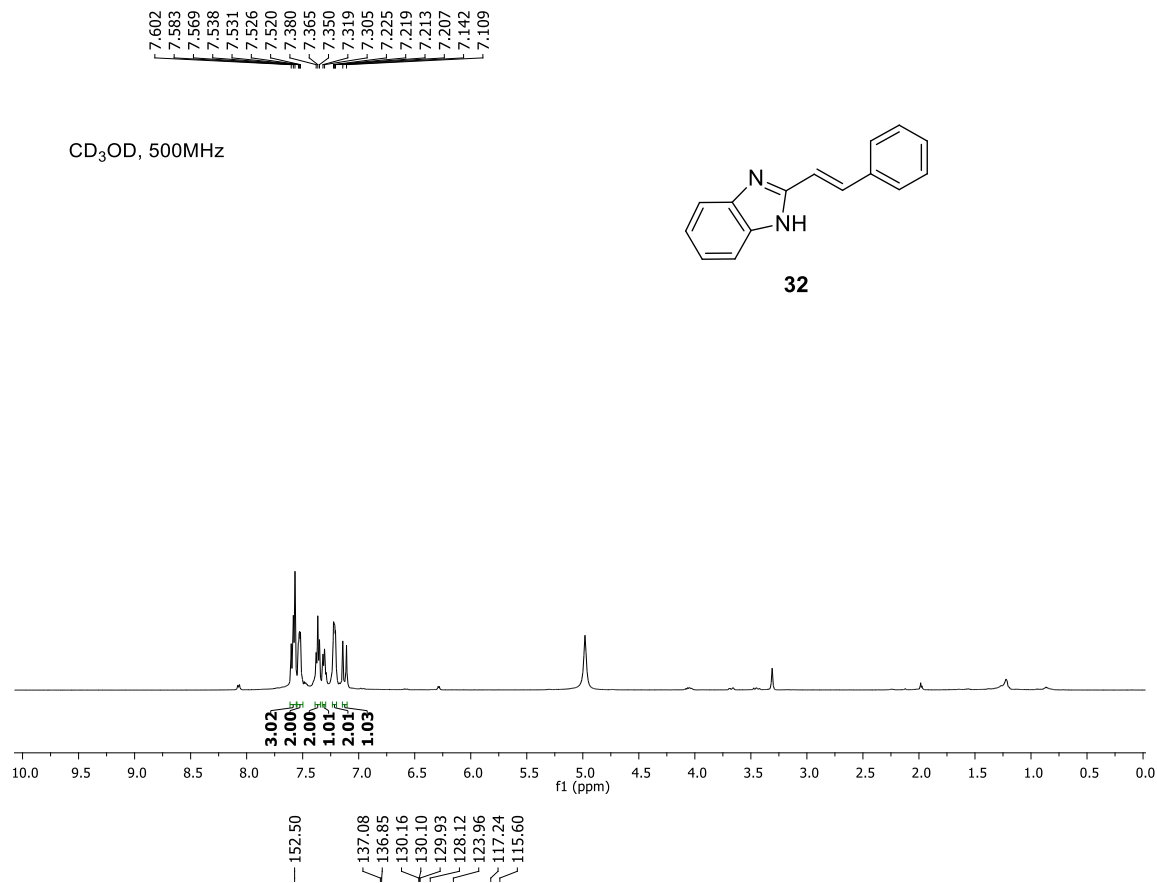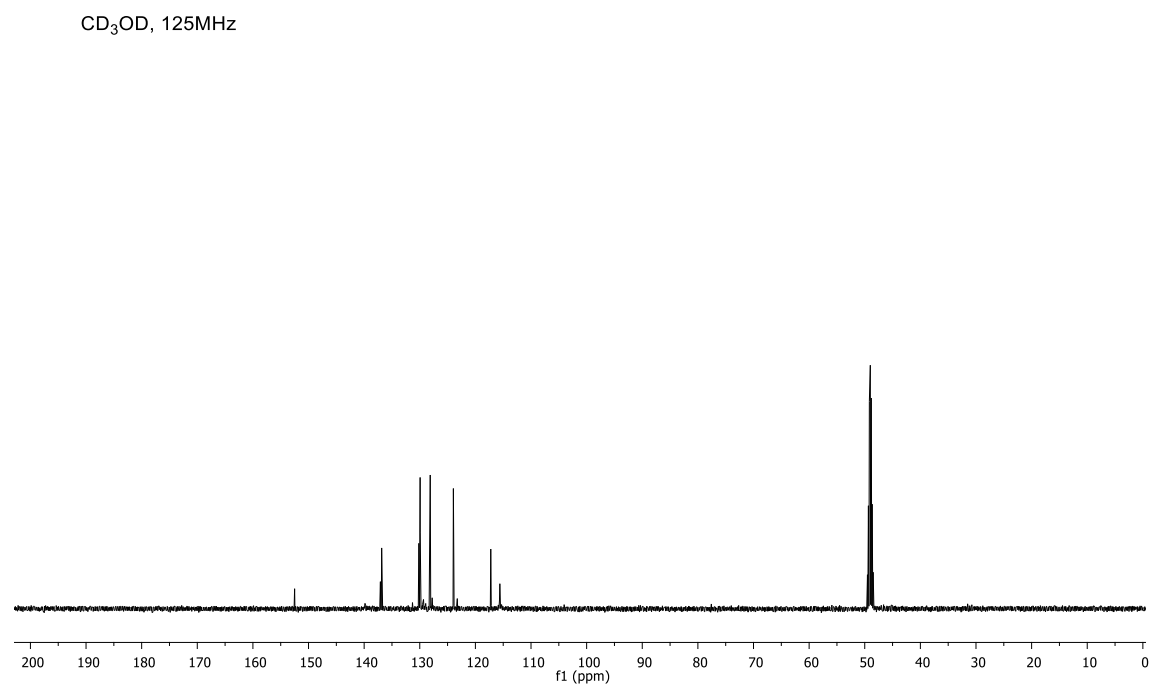

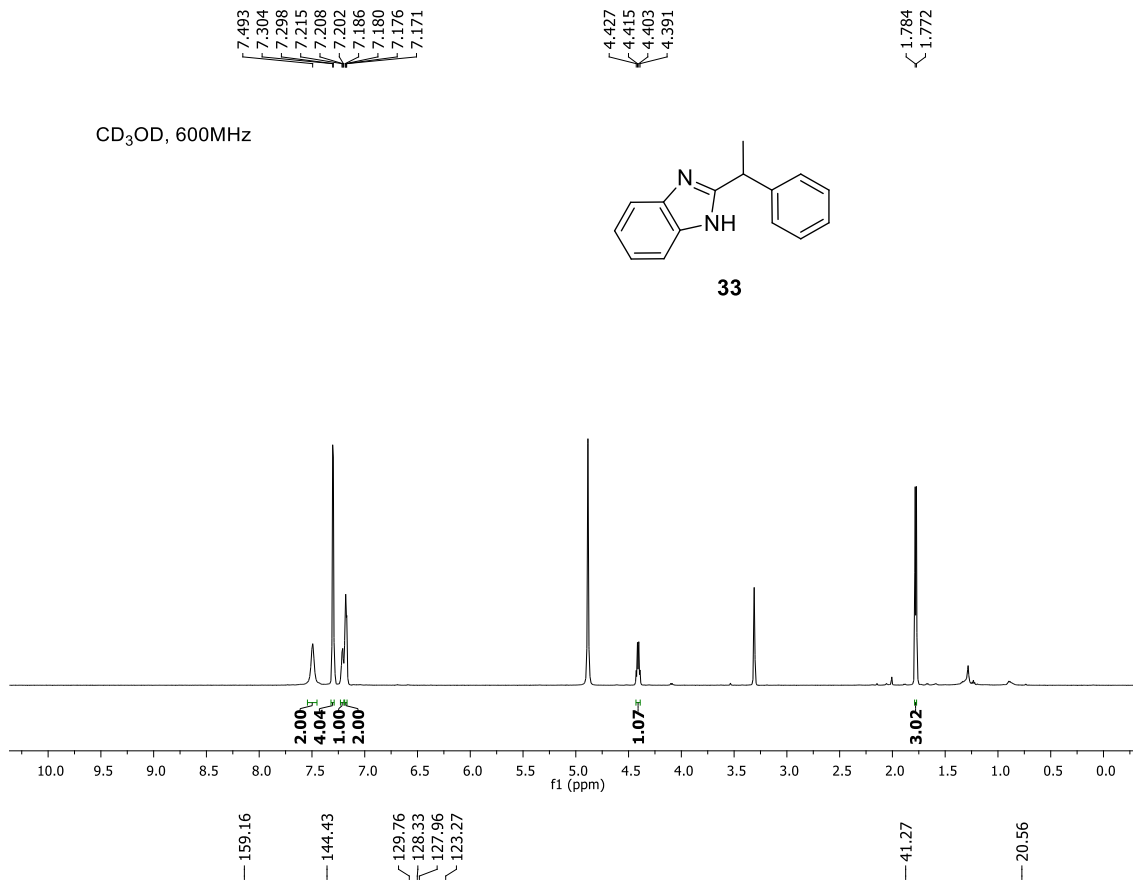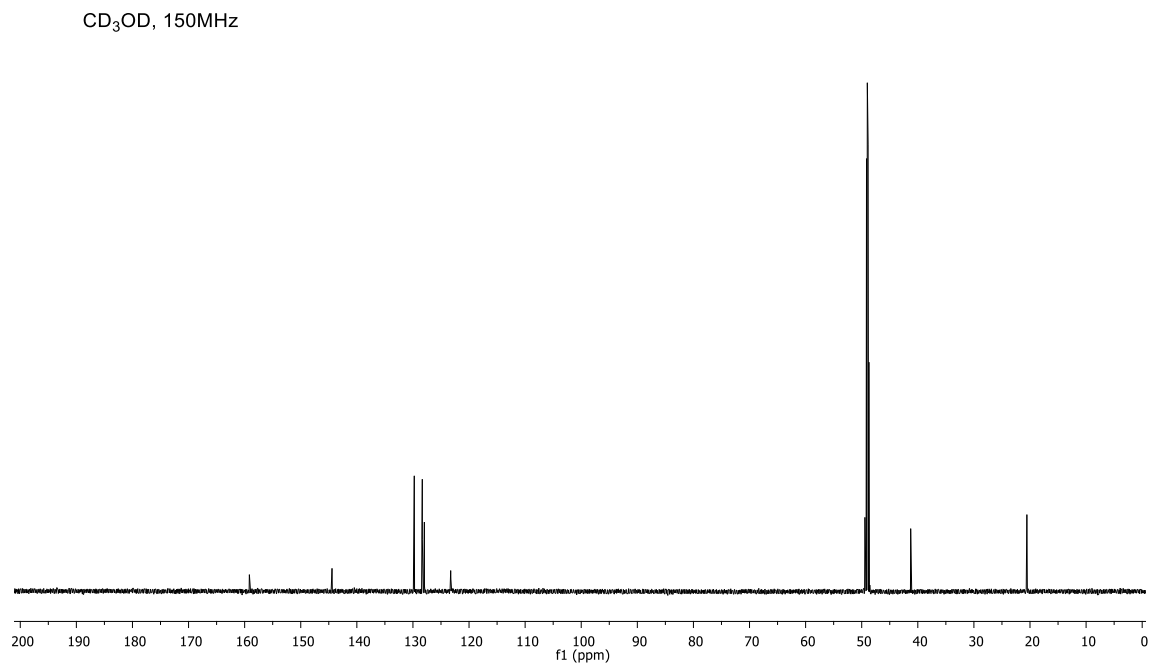

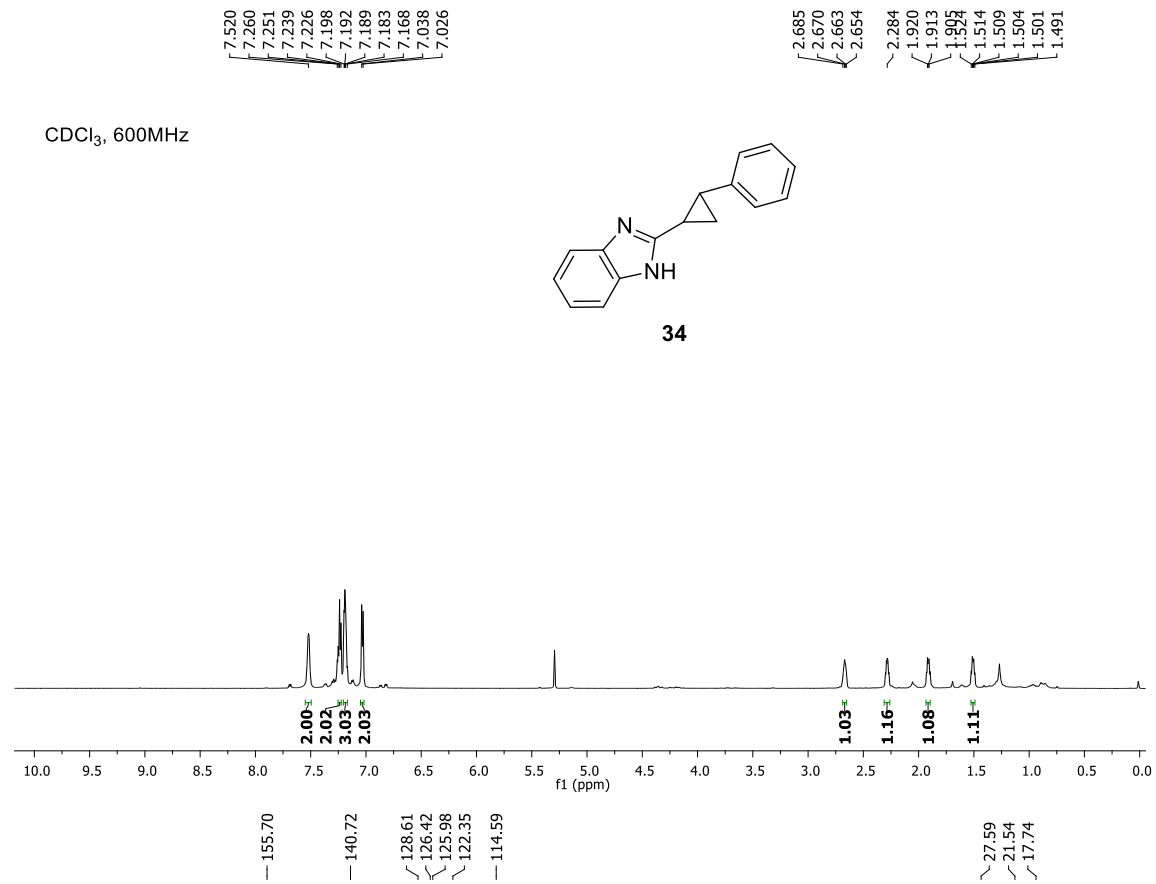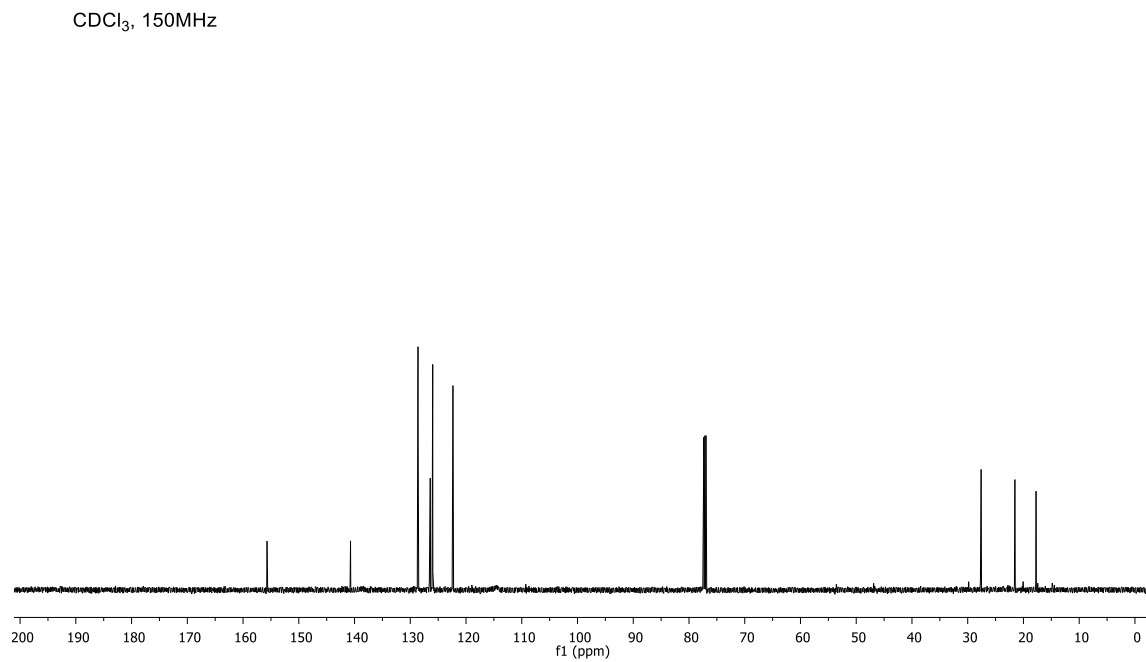



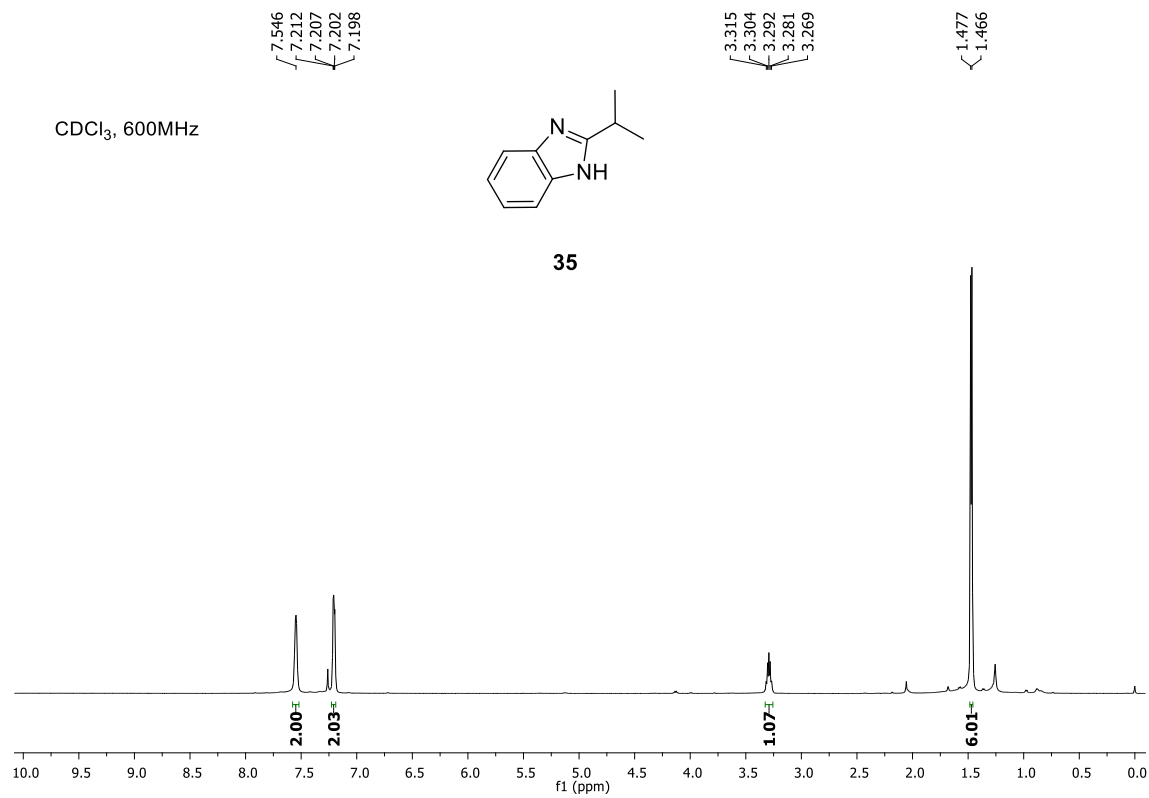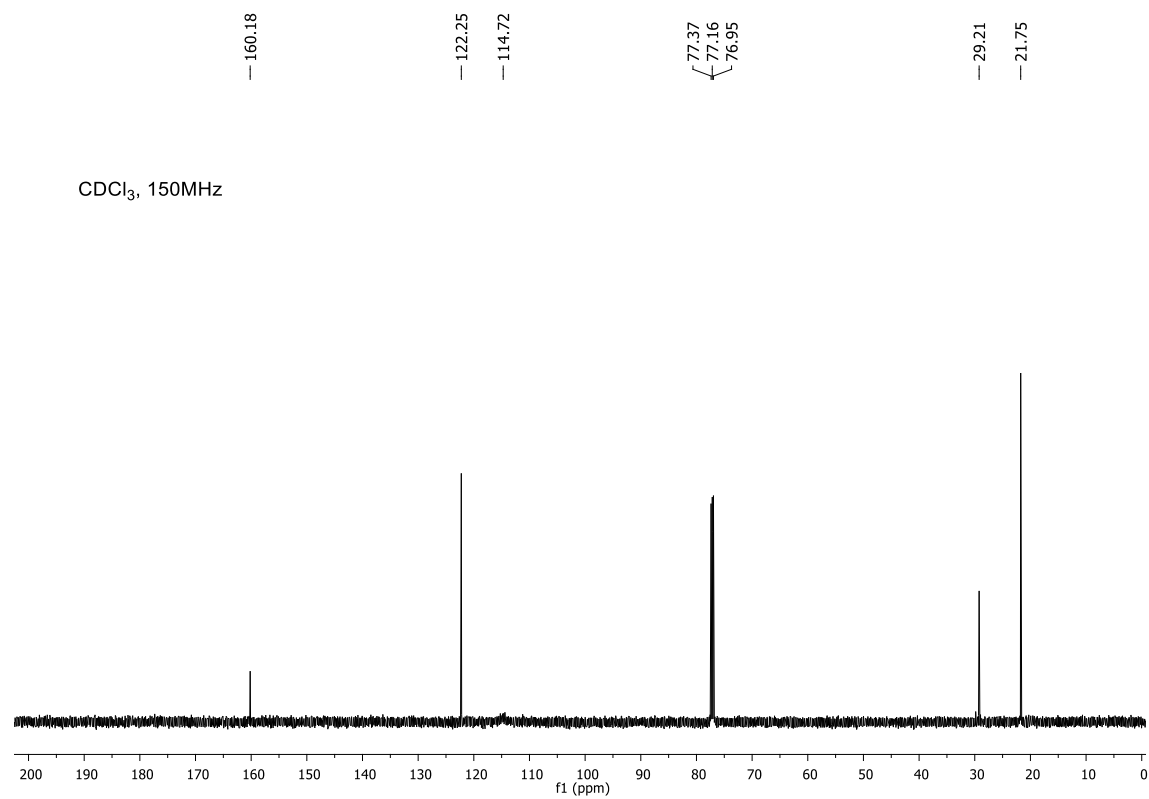

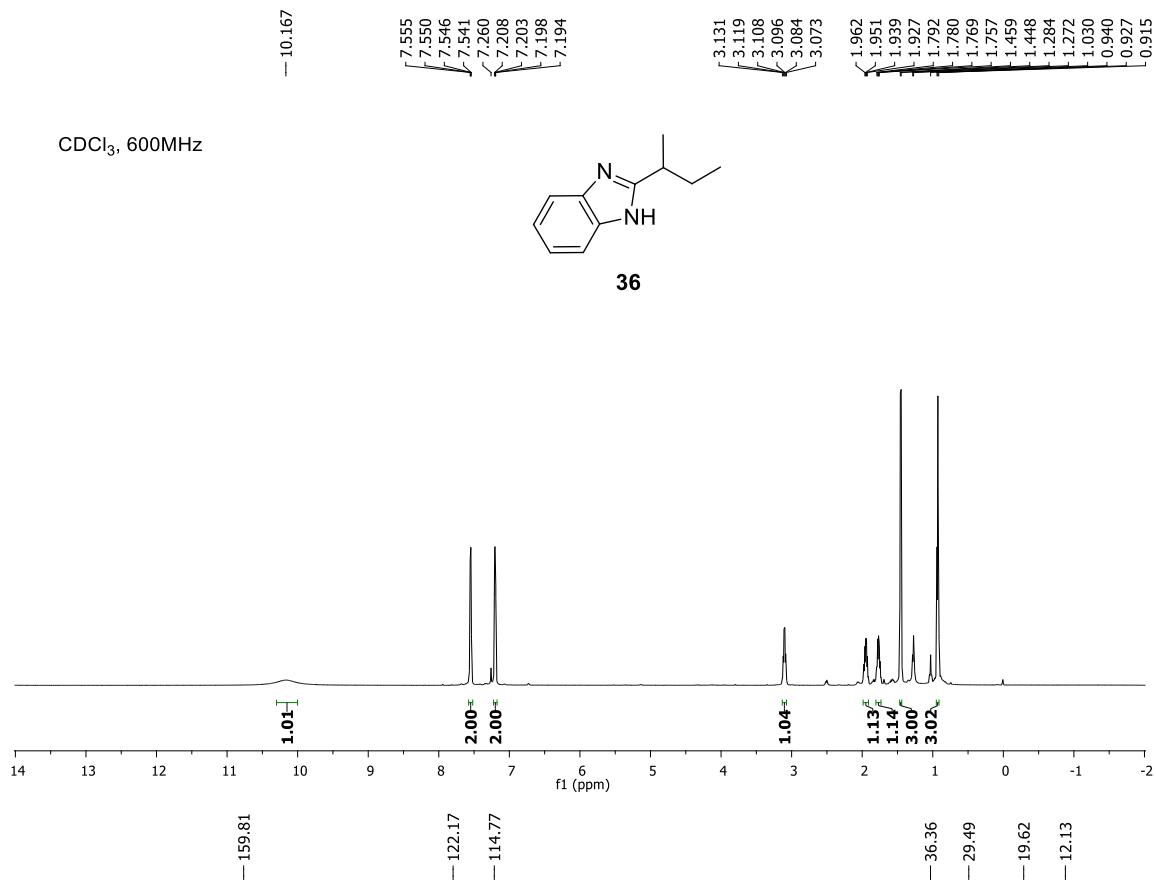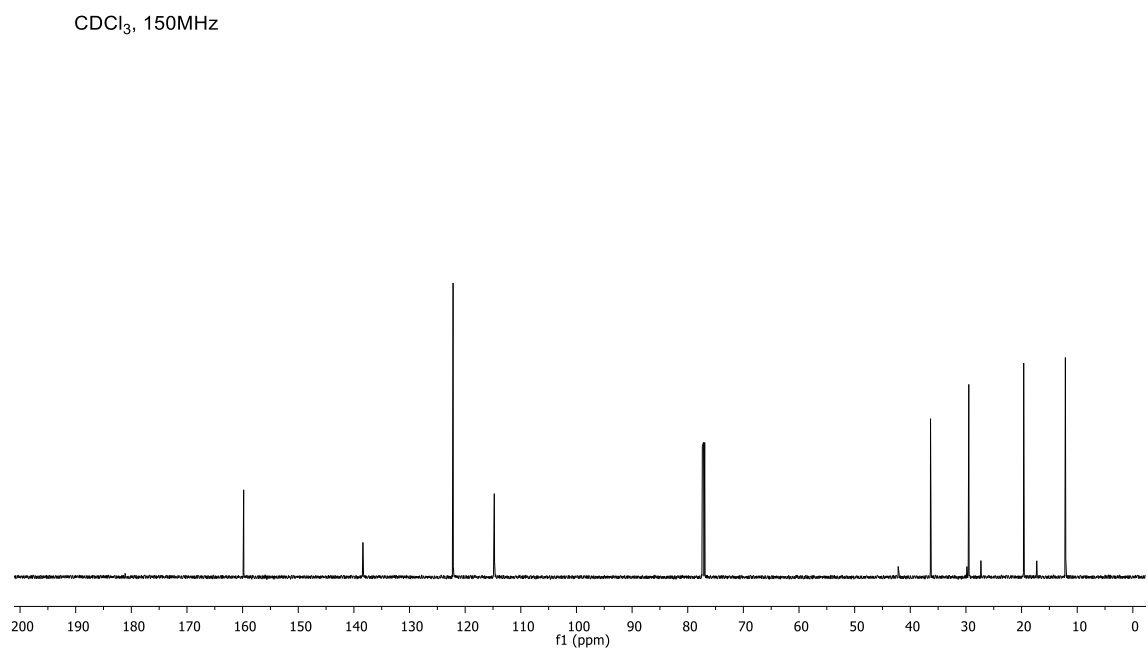

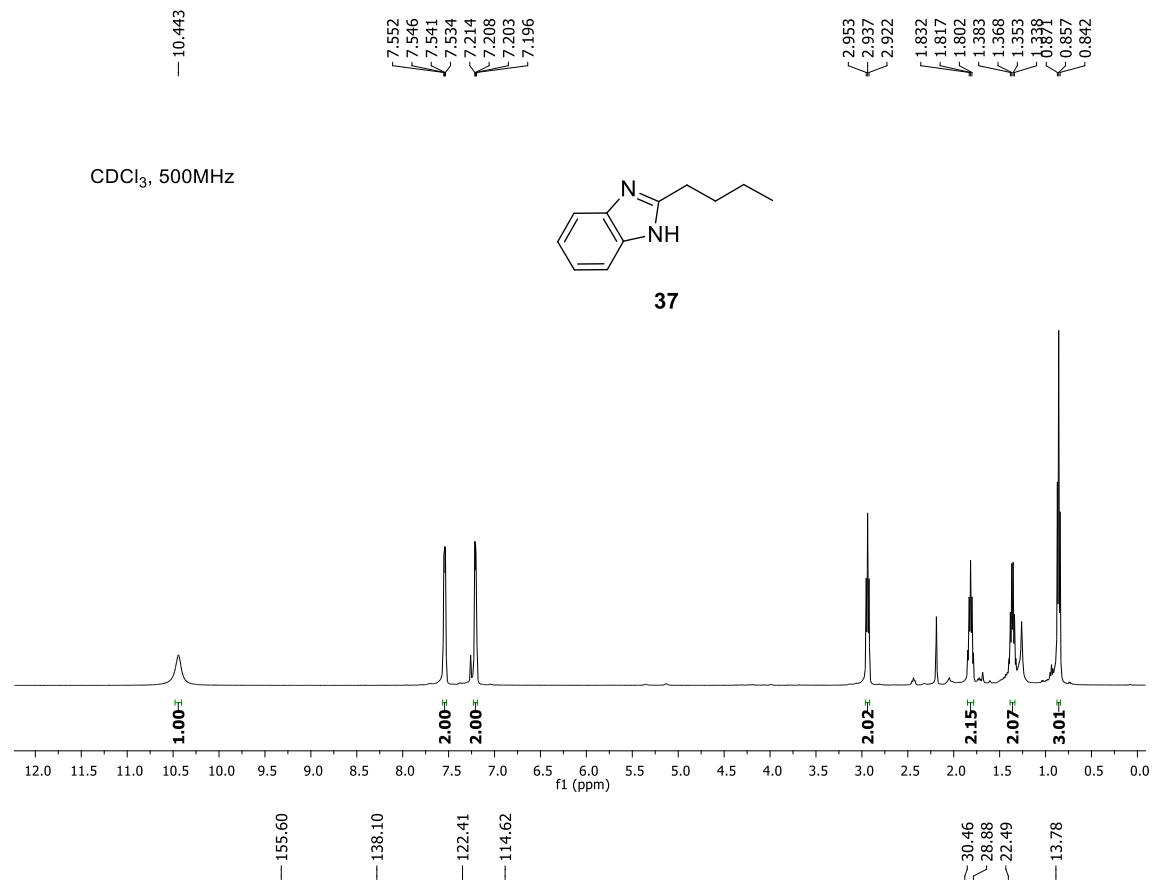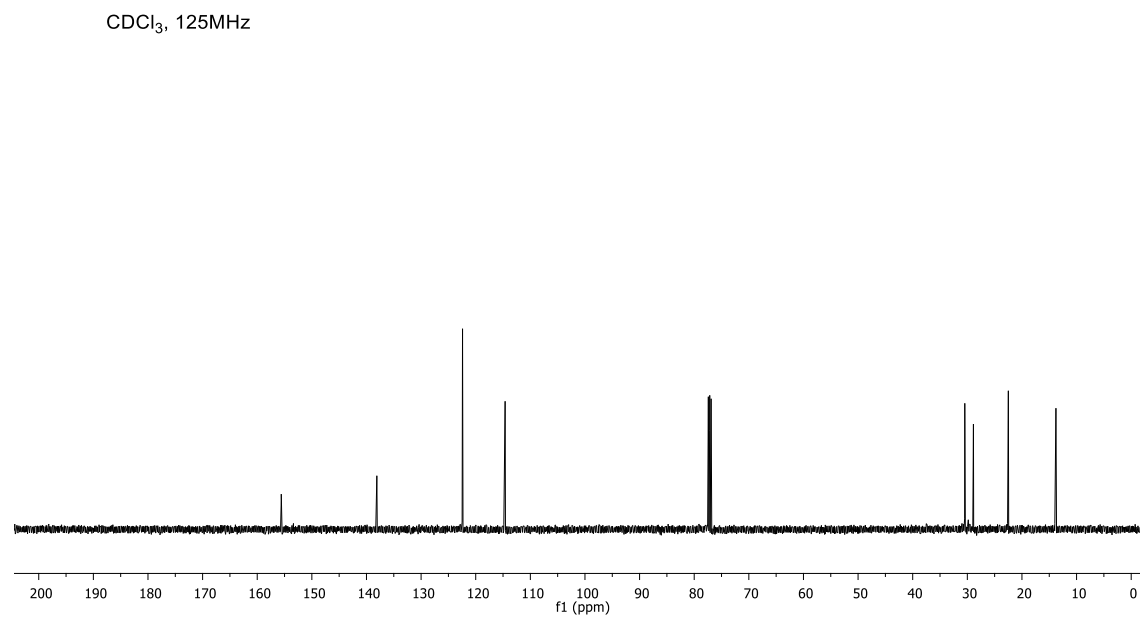

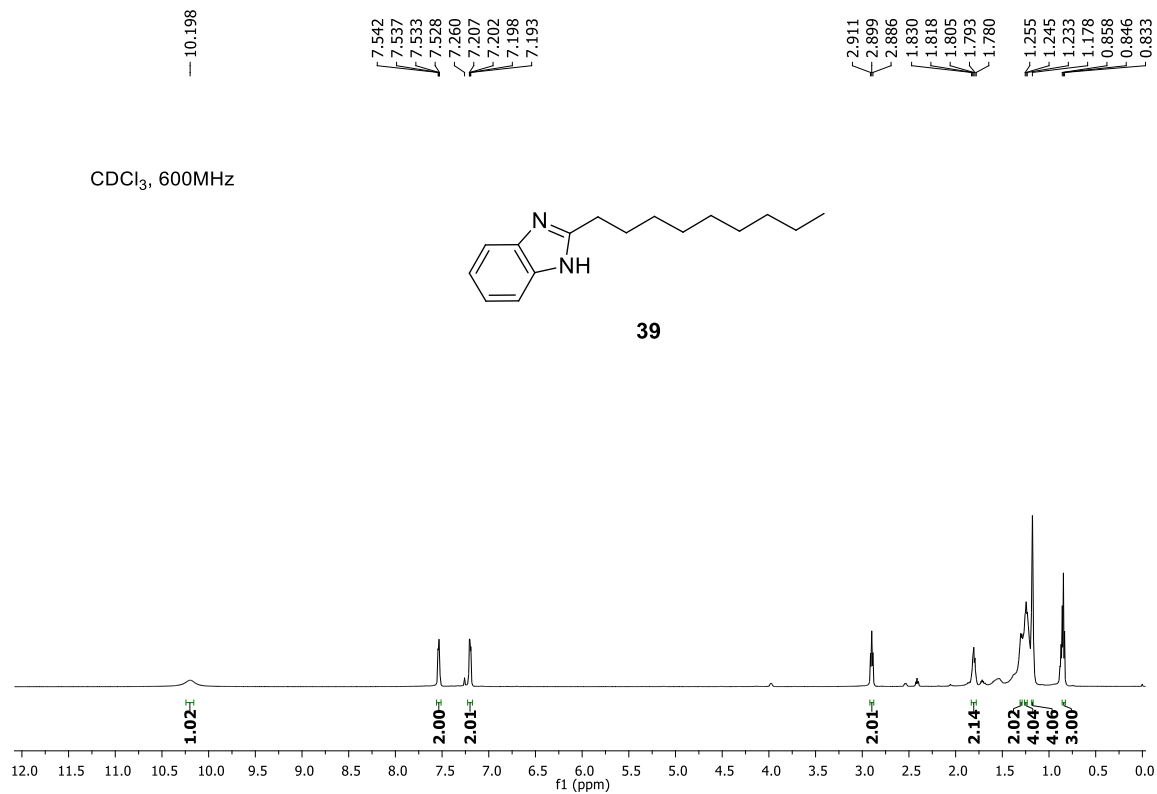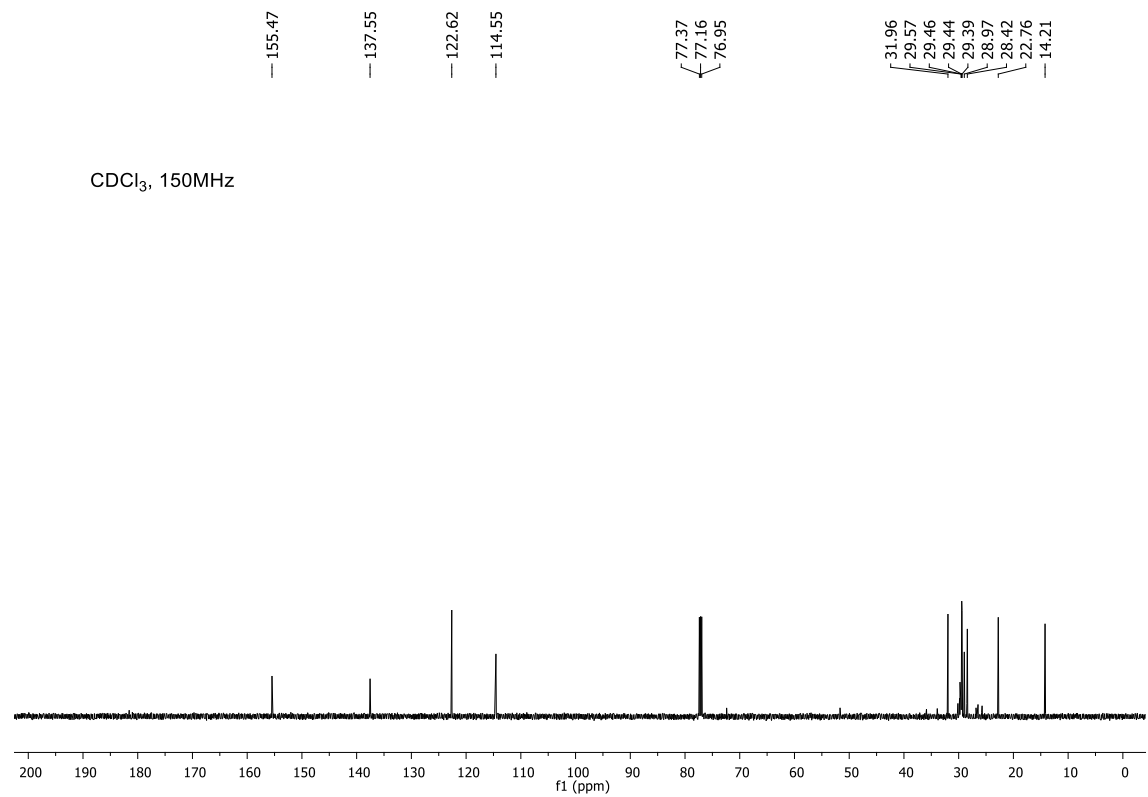

CD<sub>3</sub>OD, 600MHz

9.102  
8.465  
7.563  
7.558  
7.553  
7.548  
7.255  
7.250  
7.245  
7.240

C1=CC=C2N=C(N1)C3=CN=CS3

**44**

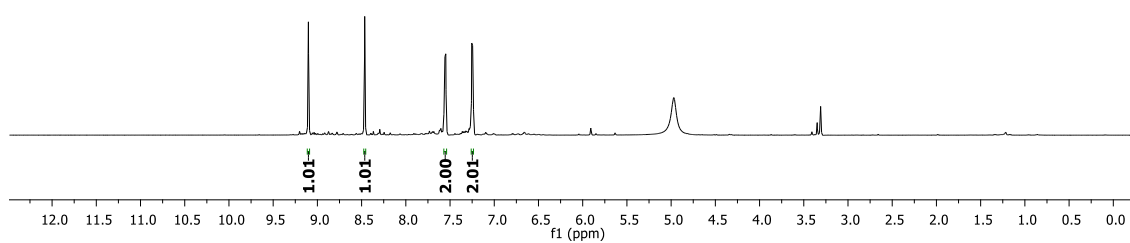

CD<sub>3</sub>OD, 150MHz

157.26  
145.71  
143.05  
130.35  
124.45  
124.26  
116.02

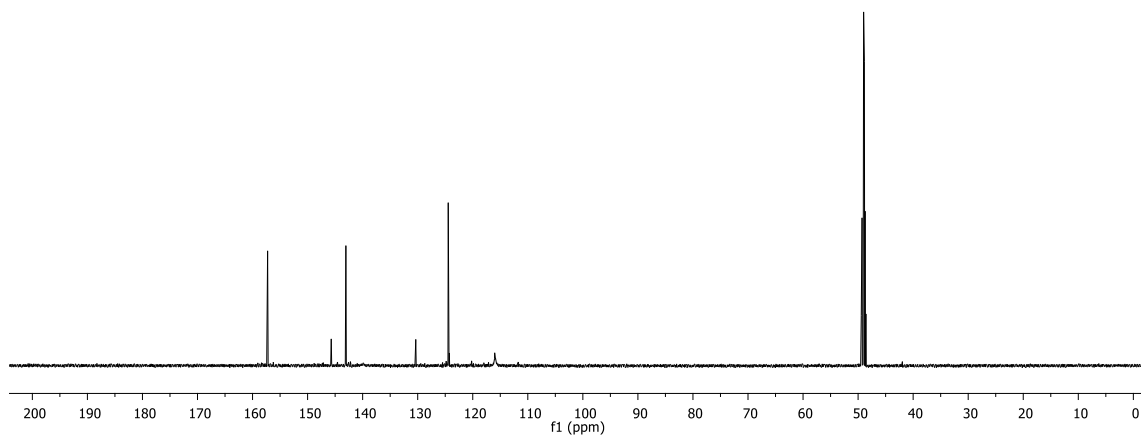

Supplement: nanomaterials-10-02405-s001.pdf [file nanomaterials-10-02405-s001.pdf]
